# Supplementary material for: Investigating the Biocontrol Potential of the Natural Microbiota of the Apple Blossom
Source: Microorganisms. 2022 Dec 15;10(12):2480. doi: 10.3390/microorganisms10122480 (PMC9784478; doi:10.3390/microorganisms10122480)
Supplement: Supplementary file 1 [file microorganisms-10-02480-s001.zip › microorganisms-2076844-Table S1.xlsx]

## Sheet: 1
Isolate number	Anti Phytophthora assay	Anti Fusarium assay	Anti Erwinia assay	Closest BLAST hit	PRK341F	PRK806R	UP-1	UP-2r	Bs-Fv	Bs-Rv	ITS4-5F	ITS4-5R
1	0	1	0	0	#N/A	#N/A	#N/A	#N/A	#N/A	#N/A	#N/A	#N/A
2	1	1	0	Pseudomonas extremaustralis strain WS-1 16S ribosomal RNA gene, partial sequence	GAAGGTCTTCGGATTGTAAAGCACTTTAAGTTGGGAGGAAGGGCAGTTACCTAATACGTGATTGTTTTGACGTTACCGACAGAATAAGCACCGGCTAACTCTGTGCCAGCAGCCGCGGTAATACAGAGGGTGCAAGCGTTAATCGGAATTACTGGGCGTAAAGCGCGCGTAGGTGGTTTGTTAAGTTGGATGTGAAATCCCCGGGCTCAACCTGGGAACTGCATTCAAAACTGACTGACTAGAGTATGGTAGAGGGTGGTGGAATTTCCTGTGTAGCGGTGAAATGCGTAGATATAGGAAGGAACACCAGTGGCGAAGGCGACCACCTGGACTGATACTGACACTGAGGTGCGAAAGCGTGGGGAGCAAACAGGATTAGATACCG	#N/A	#N/A	#N/A	#N/A	#N/A	#N/A	#N/A
3	0	0	0	Pseudomonas extremaustralis strain WS-1 16S ribosomal RNA gene, partial sequence	ACNTGATTGTTTTGACGTTACCGACAGAATAAGCACCGGCTAACTCTGTGCCAGCANCCGCGGTAATACAGAGGGTGCAAGCGTTAATCGGAATTACTGGGCGTAAAGCGCGCGTANGTGGTTTGTTAANTTGGATGTGAAATCCCCGGGCTCAACCTGGGAACTGCATTCAAAACTGACTGACTAGAGTATGGTAGAGGGTGGTGGAATTTCCTGTGTAGCGGTGAAATGCGTANATATAGGAAGGAACACCAGTGGCGAAGGCGACCACCTGGACTGATACTGACACTGANGTGCGAAAGCGTGGGGAGCAAACAGGATTANATACCC	#N/A	#N/A	#N/A	#N/A	#N/A	#N/A	#N/A
4	0	1	0	0	#N/A	#N/A	#N/A	#N/A	#N/A	#N/A	#N/A	#N/A
5	0	0	0	Pseudomonas sp. strain 2180 16S ribosomal RNA gene, partial sequence	CTTCGGATTGTAAAGCANTTTAAGTTGGGAGGAAGGGCAGTAAGCGAATACCTTGCTGTTTTGACGTTACCGACAGAATAAGCACCGGCTAACTCTGTGCCAGCAGCCGCGGTAATACAGAGGGTGCAAGCGTTAATCGGAATTACTGGGCGTAAAGCGCGCGTAGGTGGTTTGTTAAGTTGAATGTGAAATCCCCGGGCTCAACCTGGGAACTGCATCCAAAACTGGCAAGCTAGAGTANGGCAGAGGGTGGTGGAATTTCCTGTGTANCGGTGAAATGCGTAGATATAGGAAGGAACACCAGTGGCGAAGGCGACCACCTGGGCTCATACTGACACTGAGGTGCGAAAGCGTGGGGAGCAAACAGGATTANATACCCNAG	#N/A	#N/A	#N/A	#N/A	#N/A	#N/A	#N/A
6	0	0	0	Pseudomonas sp. strain 2180 16S ribosomal RNA gene, partial sequence	#N/A	GTCAGTATGAGCCCAGGTGGTCGCCTTCGCCACTGGTGTTCCTTCCTATATCTACGCATTTCACCGCTACACAGGAAATTCCACCACCCTCTGCCCTACTCTAGCTTGCCAGTTTTGGATGCAGTTCCCAGGTTGAGCCCGGGGATTTCACATTCAACTTAACAAACCACCTACGCGCGCTTTACGCCCAGTAATTCCGATTAACGCTTGCACCCTCTGTATTACCGCGGCTGCTGGCACAGAGTTAGCCGGTGCTTATTCTGTCGGTAACGTCAAAACAGCAAGGTATTCGCTTACTGCCCTTCCTCCCAACTTAAAGTGCTTTACAATCCGAAGACCTTCTTCACACACGCGGCATGGCTGGATCAGGCTTTCGCCCATTGTCCAATATTCCCCACT…	#N/A	#N/A	#N/A	#N/A	#N/A	#N/A
7	0	0	0	Pseudomonas extremaustralis strain WS-1 16S ribosomal RNA gene, partial sequence	CTTCGGATTGNAAAGCACTTTANGTTGGGAGGAAGGGNAGTAANCGAATACCTTGCTGTTTTGACGTTACCGACAGAATAAGCACCGGCTAACTCTGTGCCAGCAGCCGCGGTAATACAGAGGGTGCAAGCGTTAATCGGAATTACTGGGCGTAAAGCGCGCGTAGGTGGTTTGTTAAGTTGAATGTGAAATCCCCGGGCTCAACCTGGGAACTGCATCCAAAACTGGCAAGCTAGAGTAGGGCAGAGGGTGGTGGAATTTCCTGTGTAGCGGTGAAATGCGTAGATATAGGAAGGAACACCAGTGGCGAAGGCGACCACCTGGGCTCATACTGACACTGAGGTGCGAAAGCGTGGGGAGCAAACAGGATTAGATACCCAAG	#N/A	#N/A	#N/A	#N/A	#N/A	#N/A	#N/A
8	0	0	0	Bacillus cereus strain yasmun80b 16S ribosomal RNA gene, partial sequence	#N/A	TCCAGGTGGTCGCCTTCGCCACTGGTGTTCCTTCCTATATCTACGCATTTCACCGCTACACAGGAAATTCCACCACCCTCTACCATACTCTAGTCAGTCAGTTTTGAATGCAGTTCCCAGGTTGAGCCCGGGGATTTCACATCCNACTTAACAAACCACCTACGCGCGCTTTACGCCCAGTAATTCCGATTAACGCTTGCACCCTCTGTATTACCGCGGCTGCTGGCACAGAGTTAGCCGGTGCTTATTCTGTCNGTAACGTCAAAACAATCACGTATTANGTAACTGCCCTTCCTCCCAACTTAAAGTGCTTTACAATCCGAAGACCTTCTTCACACACGCGGCATGGCTGGATCAGGCTTTCGCCCATTGTCCAATATTCCCCACTGCTGA	#N/A	#N/A	#N/A	#N/A	#N/A	#N/A
9	0	0	0	0	#N/A	#N/A	#N/A	#N/A	#N/A	#N/A	#N/A	#N/A
10	0	1	0	Pseudomonas extremaustralis strain WS-1 16S ribosomal RNA gene, partial sequence	ATGCCGCGTGTGTGAAGAAGGTCTTCGGATTGTAAAGCACTTTAAGTTGGGAGGAAGGGCAGTTACCTAATACGTGATTGTTTTGACGTTACCGACAGAATAAGCACCGGCTAACTCTGTGCCAGCAGCCGCGGTAATACAGAGGGTGCAAGCGTTAATCGGAATTACTGGGCGTAAAGCGCGCGTAGGTGGTTTGTTAAGTTGGATGTGAAATCCCCGGGCTCAACCTGGGAACTGCATTCAAAACTGACTGACTAGAGTATGGTAGAGGGTGGTGGAATTTCCTGTGTAGCGGTGAAATGCGTAGATNTAGGAAGGAACACCAGTGGCGAAGGCGACCACCTGGACTGATACTGACACTGAGGTGCGAAAGCGTGGGGAGCAAACAGGATTAGATAC…	#N/A	#N/A	#N/A	#N/A	#N/A	#N/A	#N/A
11	0	1	0	Pseudomonas extremaustralis strain WS-1 16S ribosomal RNA gene, partial sequence	ATGCCGCGTGTGTGAAGAAGGTCTTCGGATTGTAAAGCACTTTAAGTTGGGAGGAAGGGCAGTTACCTAATACGTGATTGTTTTGACGTTACCGACAGAATAAGCACCGGCTAACTCTGTGCCAGCAGCCGCGGTAATACAGAGGGTGCAAGCGTTAATCGGAATTACTGGGCGTAAAGCGCGCGTAGGTGGTTTGTTAAGTTGGATGTGAAATCCCCGGGCTCAACCTGGGAACTGCATTCAAAACTGACTGACTAGAGTATGGTAGAGGGTGGTGGAATTTCCTGTGTAGCGGTGAAATGCGTAGATNTAGGAAGGAACACCAGTGGCGAAGGCGACCACCTGGACTGATACTGACACTGAGGTGCGAAAGCGTGGGGAGCAAACAGGATTAGATAC…	#N/A	#N/A	#N/A	#N/A	#N/A	#N/A	#N/A
12	0	1	0	0	#N/A	#N/A	#N/A	#N/A	#N/A	#N/A	#N/A	#N/A
13	0	0	0	0	#N/A	#N/A	#N/A	#N/A	#N/A	#N/A	#N/A	#N/A
14	0	1	0	Pseudomonas lurida strain WL94 16S ribosomal RNA gene, partial sequence	#N/A	GTCAGTATTAGTCCAGGTGGTCGCCTTCGCCACTGGTGTTCCTTCCTATATCTACGCATTTCACCGCTACACAGGAAATTCCACCACCCTCTACCATACTCTAGTCAGTCAGTTTTGAATGCAGTTCCCAGGTTGAGCCCGGGGATTTCACATCCAACTTAACAAACCACCTACGCGCGCTTTACGCCCAGTAATTCCGATTAACGCTTGCACCCTCTGTATTACCGCGGCTGCTGGCACAGAGTTAGCCGGTGCTTATTCTGTCGGTAACGTCAAAACAGTTACGTATTAGGCAACTGCCCTTCCTCCCAACTTAAAGTGCTTTACAATCCGAAGACCTTCTTCACACACGCGGCATGGCTGGATCAGGCTTTCGCCCATTGTCCAATATTCCCCACT…	#N/A	#N/A	#N/A	#N/A	#N/A	#N/A
15	0	1	0	0	#N/A	#N/A	#N/A	#N/A	#N/A	#N/A	#N/A	#N/A
16	0	1	0	Pseudomonas sp. strain AS491 16S ribosomal RNA gene, partial sequence	#N/A	AGTATTAGTCCAGGTGGTCGCCTTCGCCACTGGTGTTCCTTCCTATATCTACGCATTTCACCGCTACACAGGAAATTCCACCACCCTCTACCATACTCTAGTCAGTCAGTTTTGAATGCAGTTCCCAGGTTGAGCCCGGGGATTTCACATCCAACWTAACAAACCACCTACGCGCGCTTTACGCCCAGTAATTCCGATTAACGCTTGCACCCTCTGTATTACCGCGGCTGCTGGCACAGAGTTAGCCGGTGCTTATTCTGTCGGTAACGTCAAAACAGTTACGTATTAGGCAACTGCCCTTCCTCCCAACTTAAAGTGCTTTACAATCCGAAGACCWTCTTCACACACGCGGCATGGCTGGATCAGGCTTTCGCCCATTGTCCAATATTCCCCACTGCT…	#N/A	#N/A	#N/A	#N/A	#N/A	#N/A
17	0	0	0	Pseudomonas sp. strain 2180 16S ribosomal RNA gene, partial sequence	#N/A	GTCAGTATGAGCCCAGGTGGTCGCCTTCGCCACTGGTGTTCCTTCCTATATCTACGCATTTCACCGCTACACAGGAAATTCCACCACCCTCTGCCCTACTCTAGCTTGCCAGTTTTGGATGCAGTTCCCAGGTTGAGCCCGGGGATTTCACATTCAACTTAACAAACCACCTACGCGCGCTTTACGCCCAGTAATTCCGATTAACGCTTGCACCCTCTGTATTACCGCGGCTGCTGGCACAGAGTTAGCCGGTGCTTATTCTGTCGGTAACGTCAAAACAGCAAGGTATTCGCTTACTGCCCTTCCTCCCAACTTAAAGTGCTTTACAATCCGAAGACCTTCTTCACACACGCGGCATGGCTGGATCAGGCTTTCGCCCATTGTCCAATATTCCCCACT…	#N/A	#N/A	#N/A	#N/A	#N/A	#N/A
18	0	1	0	Pseudomonas tolaasii strain 63 16S ribosomal RNA gene, partial sequence	AGCCATGCCGCGTGTGTGAAGAAGGTCTTCGGATTGTAAAGCACTTTAAGTTGGGAGGAAGGGCAGTTGCCTAATACGTAACTGTTTTGACGTTACCGACAGAATAAGCACCGGCTAACTCTGTGCCAGCAGCCGCGGTAATACAGAGGGTGCAAGCGTTAATCGGAATTACTGGGCGTAAAGCGCGCGTAGGTGGTTTGTTAAGTTGGATGTGAAATCCCCGGGCTCAACCTGGGAACTGCATTCAAAACTGACTGACTAGAGTATGGTAGAGGGTGGTGGAATTTCCTGTGTAGCGGTGAAATGCGTAGATATAGGAAGGAACACCAGTGGCGAAGGCGACCACCTGGACTAATACTGACACTGAGGTGCGAAAGCGTGGGGAGCAAACAGGATTAN…	#N/A	#N/A	#N/A	#N/A	#N/A	#N/A	#N/A
19	0	0	0	Plesiomonas shigelloides strain FDAARGOS_725 chromosome	#N/A	CCTYCMKATMTCTACGCATTTCACCGCTACACMKGRAATTCNACCMCCCTCTRCMNNACTCTAGCTTGCCAGTTTNNNATGCAGTTCCCANGTTGAGCNCGGGGATTTCACATNNNACTTAACAAACCRCCTNCGNGCGCTTTACGCCCAGTAATTCCGATTAACGCTTGCACCCTCYGTATTACCGCGGCTGCTGGCACRGAGTTAGCCGGTGCTTMTTCTGNNAGTAACGTCAANGAANNNNGGTATTNACNNNNAGCCCTTCCTCCYMRCTNAAAGTGCTTTACAAYCCGAAGACCTTCTTCACACACGCGGCATGGCTGSATCAGGCTTKCGCCCATTGTSCAATATTCCCCACTGCTGCC	#N/A	#N/A	#N/A	#N/A	#N/A	#N/A
20	0	0	0	Uncultured Pseudomonas sp. clone 603 16S ribosomal RNA gene, partial sequence	GTGGTTTGTTAAGTTGAATGTGAAATCCCCGGGCTCAACCTGGGAACTGCATCCNAAACTGGCANGCTAGAGTANGGNAGAGGGNGGTGGAATTTCCTGTGNANCGGTGAAATGCNTANATNTAGGAAGGAACACCAGTGGCNAAGGCNACCACCTGGGCTCATACTGANACTGAGGTGCGAAAGCGTGGGGAGCAAAC	#N/A	#N/A	#N/A	#N/A	#N/A	#N/A	#N/A
21	0	0	0	0	#N/A	#N/A	#N/A	#N/A	#N/A	#N/A	#N/A	#N/A
22	0	1	0	0	#N/A	#N/A	#N/A	#N/A	#N/A	#N/A	#N/A	#N/A
23	0	0	0	0	#N/A	#N/A	#N/A	#N/A	#N/A	#N/A	#N/A	#N/A
24	1	0	0	0	#N/A	#N/A	#N/A	#N/A	#N/A	#N/A	#N/A	#N/A
25	2	1	0	Citrobacter freundii strain HF-17-2 16S ribosomal RNA gene, partial sequence	TGCCGCGTGTNTGAAGAAGGNCTTCGGNTTGTAAAGNACTTTCAGYKRGGAGGAAGGNGTTGTGGTTAATANCCNCANNNNTTGACGTTACTCNCAGAAKAAGCACCGGCTAACTCCGTGCCAGCAGCCGCGGTAATACNGAGGGTGCAAGCGTTAATCGGAATTACTGGGCGTAAAGCGCACGCAGGCGGTCTGTCAAGTCGGATGTGAAATCCCCGGGCTCAACCTGGGAACTGCATCCNAAACTGGCANGCTAGAGTCTTGTAGAGGGGGGTNNAATTCCAGGTGTAGCGGTGAAATGCGTAGANATCTGNAGGAATACCGGTGGCGAAGGCGNCCCCCTGGACAAAGACTGACGCTCAGGTGCGAAAGCGTGGGGAGCAAACAGGATTAGATACC…	#N/A	#N/A	#N/A	#N/A	#N/A	#N/A	#N/A
26	2	0	0	Pseudomonas sp. strain 2180 16S ribosomal RNA gene, partial sequence	#N/A	GTCAGTATGAGCCCAGGTGGTCGCCTTCGCCACTGGTGTTCCTTCCTATATCTACGCATTTCACCGCTACACAGGAAATTCCACCACCCTCTGCCCTACTCTAGCTTGCCAGTTTTGGATGCAGTTCCCAGGTTGAGCCCGGGGATTTCACATTCAACTTAACAAACCACCTACGCGCGCTTTACGCCCAGTAATTCCGATTAACGCTTGCACCCTCTGTATTACCGCGGCTGCTGGCACAGAGTTAGCCGGTGCTTATTCTGTCGGTAACGTCAAAACAGCAAGGTATTCGCTTACTGCCCTTCCTCCCAACTTAAAGTGCTTTACAATCCGAAGACCTTCTTCACACACGCGGCATGGCTGGATCAGGCTTTCGCCCATTGTCCAATATTCCCCACT…	#N/A	#N/A	#N/A	#N/A	#N/A	#N/A
27	0	0	0	Pseudomonas graminis strain PgKB30 chromosome, complete genome	#N/A	GTATGAGCCCAGGTGGTCGCCTTCGCCACTGGTGTTCCTTCCTATATCTACGCATTTCACCGCTACACAGGAAATTCCACCACCCTCTGCCCTACTCTAGCTTGCCAGTTTTGGATGCAGTTCCCAGGTTGAGCCCGGGGATTTCACATTCAACTTAACAAACCACCTACGCGCGCTTTACGCCCAGTAATTCCGATTAACGCTTGCACCCTCTGTATTACCGCGGCTGCTGGCACAGAGTTAGCCGGTGCTTATTCTGTCGGTAACGTCAAAACAGCAAGGTATTCGCTTACTGCCCTTCCTCCCAACTTAAAGTGCTTTACAATCCGAAGACCTTCTTCACACACGCGGCATGGCTGGATCAGGCTTTCGCCCATTGTCCAATATTCCCCACTGCTG…	#N/A	#N/A	#N/A	#N/A	#N/A	#N/A
28	0	0	0	Corynebacterium variabile strain 1486 16S ribosomal RNA gene, partial sequence	GGCCTTCGGGTTGTAAACTCCTTTCAACCATGACGAAGCATTATGTGACGGTAGTGGTAGAAGAAGCACCGGCTAACTACGTGCCAGCAGCCGCGGTAATACGTAGGGTGCGAGCGTTGTCCGGAATTACTGGGCGTAAAGAGCTCGTAGGTGGTTTGTCGCGTCGTCTGTGAAATTCCGGGGCTTAACTCCGGGCGTGCAGGCGATACGGGCATAACTTGAGTGCTGTAGGGGAGACTGGAATTCCTGGTGTAGCGGTGAAATGCGCANATATCAGGAGGAACACCGATGGCGAAGGCAGGTCTCTGGGCAGTAACTGACGCTGAGGAGCGAAAGCATGGGTAGCGAACAGGATTAGATACC	#N/A	#N/A	#N/A	#N/A	#N/A	#N/A	#N/A
29	0	0	0	Curtobacterium herbarum strain I-S-L1-2 16S ribosomal RNA gene, partial sequence	ACGCCGCGTGAGGGATGACGGCCTTCGGGTTGTAAACCTCTTTTAGTAGGGAAGAAGGGAGCTTCGGTTCTTGACGGTACCTGCAGAAAAAGCACCGGCTAACTACGTGCCAGCAGCCGCGGTAATACGTANGGTGCAAGCGTTGTCCGGAATTATTGGGCGTAAAGAGCTCGTAGGCGGTTTGTCGCGTCTGCTGTGAAATCCCGAGGCTCAACCTCGGGCTTGCAGTGGGTACGGGCAGACTAGAGTGCGGTAGGGGAGATTGGAATTCCTGGTGTAGCGGTGGAATGCGCAGATATCAGGAGGAACACCGATGGCGAAGGCAGATCTCTGGGCCGTAACTGACGCTGAGGAGCGAAAGCATGGGGAGCGAACAGGATTAGATACC	#N/A	#N/A	#N/A	#N/A	#N/A	#N/A	#N/A
30	1	0	0	0	#N/A	#N/A	#N/A	#N/A	#N/A	#N/A	#N/A	#N/A
31	2	1	0	Pseudomonas extremaustralis strain WS-1 16S ribosomal RNA gene, partial sequence	#N/A	GTATCAGTCCAGGTGGTCGCCTTCGCCACTGGTGTTCCTTCCTATATCTACGCATTTCACCGCTACACAGGAAATTCCACCACCCTCTACCATACTCTAGTCAGTCAGTTTTGAATGCAGTTCCCAGGTTGAGCCCGGGGATTTCACATCCAACTTAACAAACCACCTACGCGCGCTTTACGCCCAGTAATTCCGATTAACGCTTGCACCCTCTGTATTACCGCGGCTGCTGGCACAGAGTTAGCCGGTGCTTATTCTGTCGGTAACGTCAAAACAATCACGTATTAGGTAACTGCCCTTCCTCCCAACTTAAAGTGCTTTACAATCCGAAGACCTTCTTCACACACGCGGCATGGCTGGATCAGGCTTTCGCCCATTGTCCAATATTCCCCACTGCTG…	#N/A	#N/A	#N/A	#N/A	#N/A	#N/A
32	2	1	0	0	#N/A	#N/A	#N/A	#N/A	#N/A	#N/A	#N/A	#N/A
33	2	1	0	Citrobacter freundii strain 52323CZ chromosome, complete genome	CCTTCGGNTTGTAAAGNACTTTCAGYKRGGAGGAAGGNGTTGTGGTTAATANCCNCANNNNTTGACGTTACTCNCAGAANAAGCACCGGCTAACTCCGTGCCAGCAGCCGCGGTAATACGGAGGGTGCAAGCGTTAATCGGAATTACTGGGCGTAAAGCGCACGCAGGCGGTCTGTCAAGTCGNATGTGAAATCCCCGGGCTCAACCTGGGAACTGCATCCNAAACTGGCANGCTAGAGTCTTGTAGAGGGGGGTNGAATTCCAGGNGTAGCGGTGAAATGCGTAGANATCTGNAGGAANACCGGTGGCGAAGGCGNCCCCCTGGACAAAGACTGACGCTNAGGTGCGAAAGCGTGGGGAGCAAACAGGATTAGATACCCG	#N/A	#N/A	#N/A	#N/A	#N/A	#N/A	#N/A
34	0	0	0	Pseudomonas sp. strain 2180 16S ribosomal RNA gene, partial sequence	#N/A	CCACTGGTGTTCCTTCCTATATCTACGCATTTCACCGCTACACAGGAAATTCCACCACCCTCTGCCCTACTCTAGCTTGCCAGTTTTGNANGCANTTCCCAGGTTGAGCCCGGGGATTTCACATTCAACTTAACAAACCACCTACGCGCGCTTTACGCCCAGTAATTCCGATTAACGCTTGCNCCCTCTGTATTACCGCGGCTGCTGGCACANAGTTAGCCGGNGCTTATTCTGTCGGTAACGTCAAAACANCAAGGTATTCGCTTACTGCCCTTCCTCCCAANTTAAAGTGCTTTANAANCCGAANACCTTCTTCACACACNCGGCATGGCTGGATCAGGNTTTCNCCCATTGNCCAATANTCCCCA	#N/A	#N/A	#N/A	#N/A	#N/A	#N/A
35	0	0	0	Pseudomonas sp. strain 2180 16S ribosomal RNA gene, partial sequence	#N/A	AGTATGAGCCCAGGTGGTCGCCTTCGCCACTGGTGTTCCTTCCTATATCTACGCATTTCACCGCTACACAGGAAATTCCACCACCCTCTGCCCTACTCTAGCTTGCCAGTTTTGGATGCAGTTCCCAGGTTGAGCCCGGGGATTTCACATTCAACTTAACAAACCACCTACGCGCGCTTTACGCCCAGTAATTCCGATTAACGCTTGCACCCTCTGTATTACCGCGGCTGCTGGCACAGAGTTAGCCGGTGCTTATTCTGTCGGTAACGTCAAAACAGCAAGGTATTCGCTTACTGCCCTTCCTCCCAACTTAAAGTGCTTTACAATCCGAAGACCTTCTTCACACACGCGGCATGGCTGGATCAGGCTTTCGCCCATTGTCCAATATTCCCCACTGCT…	#N/A	#N/A	#N/A	#N/A	#N/A	#N/A
36	0	0	0	0	#N/A	#N/A	#N/A	#N/A	#N/A	#N/A	#N/A	#N/A
37	0	0	0	Pseudomonas sp. strain 2180 16S ribosomal RNA gene, partial sequence	#N/A	GTCAGTATGAGCCCAGGTGGTCGCCTTCGCCACTGGTGTTCCTTCCTATATCTACGCATTTCACCGCTACACAGGAAATTCCACCACCCTCTGCCCTACTCTAGCTTGCCAGTTTTGGATGCAGTTCCCAGGTTGAGCCCGGGGATTTCACATTCAACTTAACAAACCACCTACGCGCGCTTTACGCCCAGTAATTCCGATTAACGCTTGCACCCTCTGTATTACCGCGGCTGCTGGCACAGAGTTAGCCGGTGCTTATTCTGTCGGTAACGTCAAAACAGCAAGGTATTCGCTTACTGCCCTTCCTCCCAACTTAAAGTGCTTTACAATCCGAAGACCTTCTTCACACACGCGGCATGGCTGGATCAGGCTTTCGCCCATTGTCCAATATTCCCCACT…	#N/A	#N/A	#N/A	#N/A	#N/A	#N/A
38	0	0	0	0	#N/A	#N/A	#N/A	#N/A	#N/A	#N/A	#N/A	#N/A
39	1	0	0	0	#N/A	#N/A	#N/A	#N/A	#N/A	#N/A	#N/A	#N/A
40	2	0	0	Pseudomonas poae strain XJX-5 16S ribosomal RNA gene, partial sequence	#N/A	AGTATTAGTCCAGGTGGTCNCCTTCGCCACTGGTGTTCCTTCCTATATCTACGCATTTCACCGCTACACAGGAAATTCCACCACCCTCTACCATACTCTAGTCAGTCAGTTTTGAATGCAGTTCCCAGGTTGAGCCCGGGGATTTCACATCCAACTTAACAAACCACCTACGCGCGCTTTACGCCCAGTAATTCCGATTAACGCTTGCACNCTCTGTATTACCGCGGCTGCTGGCACAGAGTTAGCCGGTGCTTATTCTGTCGGTAACGTCAAAACAATCACGTATTAGGTAACTGCCCTTCCTCCCAACTTAAAGTGCTTTACAATCCGAAGACCTTCTTCACACACGCGGCATGGCTGGATCAGGCTTTCGCCCATTGTCCAATATTCCCCACTGCT…	#N/A	#N/A	#N/A	#N/A	#N/A	#N/A
41	0	1	0	Pseudomonas poae strain XJX-5 16S ribosomal RNA gene, partial sequence	#N/A	TGTCAGTATTAGTCCAGGTGGTCGCCTTCGCCACTGGTGTTCCTTCCTATATCTACGCATTTCACCGCTACACAGGAAATTCCACCACCCTCTACCATACTCTAGTCAGTCAGTTTTGAATGCAGTTCCCAGGTTGAGCCCGGGGATTTCACATCCAACTTAACAAACCACCTACGCGCGCTTTACGCCCAGTAATTCCGATTAACGCTTGCACCCTCTGTATTACCGCGGCTGCTGGCACAGAGTTAGCCGGTGCTTATTCTGTCGGTAACGTCAAAATTGCAGAGTATTAATCTACAACCCTTCCTCCCAACTTAAAGTGCTTTACAATCCGAAGACCTTCTTCACACACGCGGCATGGCTGGATCAGGCTTTCGCCCATTGTCCAATATTCCCCAC…	#N/A	#N/A	#N/A	#N/A	#N/A	#N/A
42	2	0	0	0	#N/A	#N/A	#N/A	#N/A	#N/A	#N/A	#N/A	#N/A
43	0	0	0	Pseudomonas helmanticensis strain IBLP24 16S ribosomal RNA gene, partial sequence	GTCTTCGGATTGTAAAGCACTTTAAGTTGGGAGGAAGGGCAGTAAATTANTACTTTGCTGTTTTGACGTTACCGACAGAATAAGCACCGGCTAACTCTGTGCCANCAGCCGCGGTAATACAGAGGGTGCAAGCGTTAATCGGAATTACTGGGCGTAAAGCGCGCGTAGGTGGTTCGTTAAGTTGGATGTGAAATCCCCGGGCTCAACCTGGGAACTGCATTCAAAACTGTCGAGCTAGAGTATGGTAGAGGGTGGTGGAATTTCCTGTGTAGCGGTGAAATGCGTAGATATAGGAAGGAACACCAGTGGCGAAGGCGACCACCTGGACTGATACTGACACTGAGGTGCGAAAGCGTGGGGAGCAAACAGGATTAGATACCCCG	#N/A	#N/A	#N/A	#N/A	#N/A	#N/A	#N/A
44	0	1	0	Pseudomonas azotoformans strain BS&H38 16S ribosomal RNA gene, partial sequence	#N/A	TGTCAGTATTAGTCCAGGTGGTCGCCTTCGCCACTGGTGTTCCTTCCTATATCTACGCATTTCACCGCTACACAGGAAATTCCACCACCCTCTACCATACTCTAGTCAGTCAGTTTTGAATGCAGTTCCCAGGTTGAGCCCGGGGATTTCACATCCAACTTAACAAACCACCTACGCGCGCTTTACGCCCAGTAATTCCGATTAACGCTTGCACCCTCTGTATTACCGCGGCTGCTGGCACAGAGTTAGCCGGTGCTTATTCTGTCGGTAACGTCAAAATTGCAGAGTATTAATCTACAACCCTTCCTCCCAACTTAAAGTGCTTTACAATCCGAAGACCTTCTTCACACACGCGGCATGGCTGGATCAGGCTTTCGCCCATTGTCCAATATTCCCCAC…	#N/A	#N/A	#N/A	#N/A	#N/A	#N/A
45	0	2	0	0	#N/A	#N/A	#N/A	#N/A	#N/A	#N/A	#N/A	#N/A
46	2	0	0	0	#N/A	#N/A	#N/A	#N/A	#N/A	#N/A	#N/A	#N/A
47	1	1	0	0	#N/A	#N/A	#N/A	#N/A	#N/A	#N/A	#N/A	#N/A
48	3	0	0	0	#N/A	#N/A	#N/A	#N/A	#N/A	#N/A	#N/A	#N/A
49	2	0	0	0	#N/A	#N/A	#N/A	#N/A	#N/A	#N/A	#N/A	#N/A
50	0	1	0	Pseudomonas extremaustralis strain WS-1 16S ribosomal RNA gene, partial sequence	#N/A	GTGTCAGTATCAGTCCAGGTGGTCGCCTTCGCCACTGGTGTTCCTTCCTATATCTACGCATTTCACCGCTACACAGGAAATTCCACCACCCTCTACCATACTCTAGTCAGTCAGTTTTGAATGCAGTTCCCAGGTTGAGCCCGGGGATTTCACATCCAACTTAACAAACCACCTACGCGCGCTTTACGCCCAGTAATTCCGATTAACGCTTGCACCCTCTGTATTACCGCGGCTGCTGGCACAGAGTTAGCCGGTGCTTATTCTGTCGGTAACGTCAAAACAATCACGTATTAGGTAACTGCCCTTCCTCCCAACTTAAAGTGCTTTACAATCCGAAGACCTTCTTCACACACGCGGCATGGCTGGATCAGGCTTTCGCCCATTGTCCAATATTCCCCA…	#N/A	#N/A	#N/A	#N/A	#N/A	#N/A
51	0	2	0	Pseudomonas tolaasii strain Pt11 chromosome, complete genome	#N/A	GTGTCAGTATTAGTCCAGGTGGTCGCCTTCGCCACTGGTGTTCCTTCCTATATCTACGCATTTCACCGCTACACAGGAAATTCCACCACCCTCTACCATACTCTAGTCAGTCAGTTTTGAATGCAGTTCCCAGGTTGAGCCCGGGGATTTCACATCCAACTTAACAAACCACCTACGCGCGCTTTACGCCCAGTAATTCCGATTAACGCTTGCACCCTCTGTATTACCGCGGCTGCTGGCACAGAGTTAGCCGGTGCTTATTCTGTCGGTAACGTCAAAAMAGTTACGTATTAGGCAACTGCCCTTCCTCCCAACTTAAAGTGCTTTACAATCCGAAGACCTTCTTCACACACGCGGCATGGCTGGATCAGGCTTTCGCCCATTGTCCAATATTCCCCA…	#N/A	#N/A	#N/A	#N/A	#N/A	#N/A
52	0	2	0	Pseudomonas sp. strain AS491 16S ribosomal RNA gene, partial sequence	#N/A	AGTATTAGTCCAGGTGGTCGCCTTCGCCACTGGTGTTCCTTCCTATATCTACGCATTTCACCGCTACACAGGAAATTCCACCACCCTCTACCATACTCTAGTCAGTCAGTTTTGAATGCAGTTCCCAGGTTGAGCCCGGGGATTTCACATCCAACTTAACAAACCACCTACGCGCGCTTTACGCCCAGTAATTCCGATTAACGCTTGCACCCTCTGTATTACCGCGGCTGCTGGCACAGAGTTAGCCGGTGCTTATTCTGTCGGTAACGTCAAAACAGTTACGTATTAGGCAACTGCCCTTCCTCCCAACTTAAAGTGCTTTACAATCCGAAGACCTTCTTCACACACGCGGCATGGCTGGATCAGGCTTTCGCCCATTGTCCAATATTCCCCACTGCT…	#N/A	#N/A	#N/A	#N/A	#N/A	#N/A
53	2	1	0	0	#N/A	#N/A	#N/A	#N/A	#N/A	#N/A	#N/A	#N/A
54	2	0	0	Pseudomonas poae strain XJX-5 16S ribosomal RNA gene, partial sequence	#N/A	AGTATTAGTCCAGGTGGTCNCCTTCGCCACTGGTGTTCCTNCCTATATCTACGCATTTCACNGCTACACAGGAAATTCCACCACCCTCTACCATACTCTAGTCAGTCAGTTTTGAATGCAGTTCCCAGGTTGAGCCCGGGGATTTCACATCCAACTTAACAAACCACCTACGCGCGCTTTACGCCCAGTAATTCCGATTAACGCTTGCACCCTCTGTATTACCGCGGCTGCTGGCACAGAGTTAGCCGGTGCTTATTCTGTCGGTAACGTCAAAACAATCACGTATTAGGTAACTGCCCTTCCTCCCAACTTAAAGTGCTTTACAATCCGAAGACCTTCTTCACACACGCGGCATGGCTGGATCAGGCTTTCGCCCATTGTCCAATATTCCCCACTGCT…	#N/A	#N/A	#N/A	#N/A	#N/A	#N/A
55	0	0	0	0	#N/A	#N/A	#N/A	#N/A	#N/A	#N/A	#N/A	#N/A
56	0	0	0	Serratia grimesii strain S9.2 16S ribosomal RNA gene, partial sequence	#N/A	CGTCAGTCTTTGTCCAGGGGGCCGCCTTCGCCACCGGTATTCCTCCAGATCTCTACGCATTTCACCGCTACACCTGGAATTCTACCCCCCTCTACAAGACTCTAGCTTGCCAGTTTCAAATGCAGTTCCCAAGTTAAGCTCGGGGATTTCACATCTGACTTAACAAACCGCCTGCGTGCGCTTTACGCCCAGTAATTCCGATTAACGCTTGCACCCTCCGTATTACCGCGGCTGCTGGCACGGAGTTAGCCGGTGCTTCTTCTGCGAGTAACGTCAATGCTCAGTGCTATTAACACTGAACCCTTCCTCCTCGCTGAAAGTGCTTTACAACCCTAAGGCCTTCTTCACACACGCGGCATGGCTGCATCAGGCTTGCGCCCATTGTGCAATATTCCCCAC…	#N/A	#N/A	#N/A	#N/A	#N/A	#N/A
57	0	0	0	Pseudomonas helmanticensis strain WK10/12 16S ribosomal RNA gene, partial sequence	#N/A	GTATCAGTCCAGGTGGTCGCCTTCGCCACTGGTGTTCCTTCCTATATCTACGCATTTCACCGCTACACAGGAAATTCCACCACCCTCTACCATACTCTAGCTCGACAGTTTTGAATGCAGTTCCCAGGTTGAGCCCGGGGATTTCACATCCAACTTAACGAACCACCTACGCGCGCTTTACGCCCAGTAATTCCGATTAACGCTTGCACCCTCTGTATTACCGCGGCTGCTGGCACAGAGTTAGCCGGTGCTTATTCTGTCGGTAACGTCAAAACAGCAAAGTATTAATTTACTGCCCTTCCTCCCAACTTAAAGTGCTTTACAATCCGAAGACCTTCTTCACACACGCGGCATGGCTGGATCAGGCTTTCGCCCATTGTCCAATATTCCCCACTGCTG…	#N/A	#N/A	#N/A	#N/A	#N/A	#N/A
58	2	1	0	Citrobacter freundii strain 52323CZ chromosome, complete genome	TGCCGCGTGTNTGAAGAAGGNCTTCGGNTTGTAAAGNACTTTCAGCNNGGAGGAAGGNGTTGTGGTTAATANCCNCANNNNTTGACGTTACTCNCAGAAKAAGCACCGGCTAACTCCGTGCCAGCAGCCGCGGTAATACRGAGGGTGCAAGCGTTAATCGGAATTACTGGGCGTAAAGCGCACGCAGGCGGTCTGTCAAGTCGGATGTGAAATCCCCGGGCTCAACCTGGGAACTGCATCCNAAACTGGCANGCTAGAGTCTTGTAGAGGGGGGTAAAATTCCAGGTGTAGCGGTGAAATGCGTANANATCTGNAGGAANACCGGTGGCGAAGGCGNCCCCCTGGACNNAGACTGACGCTNAGGTGCGAAAGCGTGGGGAGCAAACAGGATTAGATAC	#N/A	#N/A	#N/A	#N/A	#N/A	#N/A	#N/A
59	2	0	0	Pseudomonas helmanticensis strain WK10/12 16S ribosomal RNA gene, partial sequence	#N/A	GTATCAGTCCAGGTGGTCGCCTTCGCCACTGGTGTTCCTTCCTATATCTACGCATTTCACCGCTACACAGGAAATTCCACCACCCTCTACCATACTCTAGCTCGACAGTTTTGAATGCAGTTCCCAGGTTGAGCCCGGGGATTTCACATCCAACTTAACGAACCACCTACGCGCGCTTTACGCCCAGTAATTCCGATTAACGCTTGCACCCTCTGTATTACCGCGGCTGCTGGCACAGAGTTAGCCGGTGCTTATTCTGTCGGTAACGTCAAAACAGCAAAGTATTAATTTACTGCCCTTCCTCCCAACTTAAAGTGCTTTACAATCCGAAGACCTTCTTCACACACGCGGCATGGCTGGATCAGGCTTTCGCCCATTGTCCAATATTCCCCACTGCTG…	#N/A	#N/A	#N/A	#N/A	#N/A	#N/A
60	0	0	0	Citrobacter freundii strain 34-a blue 16S ribosomal RNA gene, partial sequence	NCTTCGGNTTGTAAAGNACTTTCAGYKRGGAGGAAGGNGTTGTGGTTAATANCCNCANNNNTTGACGTTACTCNCAGAAKAAGCACCGGCTAACTCCGTGCCAGCAGCCGCGGTAATACRGAGGGTGCAAGCGTTAATCGGAATTACTGGGCGTAAAGCGCACGCAGGCGGTCTGTCAAGTCGNATGTGAAATCCCCGGGCTCAACCTGGGAACTGCATCCNAAACTGGCANGCTAGAGTCTTGTAGAGGGGGGTAGAATTCCAGGTGTAGCGGTGAAATGCGTAGANATCTGNAGGAANACCGGTGGCGAAGGCGNCCCCCTGGACNNAGACTGACGCTNAGGTGCGAAAGCGTGGGGAGCAAACAGGATTAGATACCCG	#N/A	#N/A	#N/A	#N/A	#N/A	#N/A	#N/A
61	1	0	0	0	#N/A	#N/A	#N/A	#N/A	#N/A	#N/A	#N/A	#N/A
62	3	2	0	0	#N/A	#N/A	#N/A	#N/A	#N/A	#N/A	#N/A	#N/A
63	1	0	0	0	#N/A	#N/A	#N/A	#N/A	#N/A	#N/A	#N/A	#N/A
64	3	2	0	0	#N/A	#N/A	#N/A	#N/A	#N/A	#N/A	#N/A	#N/A
65	1	0	0	Pseudomonas sp. strain 2180 16S ribosomal RNA gene, partial sequence	#N/A	CAGGTGGTCGCCTTCGCCACTGGTGTTCCTTCCTATATCTACGCATTTCACCGCTACACAGGAAATTCCACCACCCTCTGCCCTACTCTAGCTTGCCAGTTTTGGATGCAGTTCCCAGGTTGAGCCCGGGGATTTCNCATTCAACTTAACAAACCACCTACGCGCGCTTTACGCCCAGTAATTCCGATTAACGCTTGCNCCCTCTGTATTACCGCGGCTGCTGGCACANANTTAGCCGGNGCTTATTCTGTCGGTAACGTCAAAACAGCAAGGTATTCGCTTACNGCCCTTCCTCCCAACTTAAAGNGNTTTACAATCCNAANACCTTCTTCACACACGCGGCANGGCNGGATCAGGCTTTCGCCCATTGTCCAANATTCCCCACTGCTGCCCCCCG	#N/A	#N/A	#N/A	#N/A	#N/A	#N/A
66	0	0	0	Serratia fonticola strain M472 16S ribosomal RNA gene, partial sequence	#N/A	CGTCAGTCTTTGTCCAGGGGGCCGCCTTCGCCACCGGTATTCCTCCAGATCTCTACGCATTTCACCGCTACACCTGGAATTCTACCCCCCTCTACAAGACTCTAGCTTGCCAGTTTCAAATGCAGTTCCCAAGTTAAGCTCGGGGATTTCACATCTGACTTAACAAACCGCCTGCGTGCGCTTTACGCCCAGTAATTCCGATTAACGCTTGCACCCTCCGTATTACCGCGGCTGCTGGCACGGAGTTAGCCGGTGCTTCTTCTGCGAGTAACGTCAATGAACRGTGCTATTAACACYGAACCCTTCCTCCTCGCTGAAAGTGCTTTACAACCCGAAGGCCTTCTTCACACACGCGGCATGGCTGCATCAGGCTTGCGCCCATTGTGCAATATTCCCCAC…	#N/A	#N/A	#N/A	#N/A	#N/A	#N/A
67	0	0	0	Pseudomonas sp. strain 2180 16S ribosomal RNA gene, partial sequence	#N/A	TGTCAGTATGAGCCCAGGTGGTCGCCTTCGCCACTGGTGTTCCTTCCTATATCTACGCATTTCACCGCTACACAGGAAATTCCACCACCCTCTGCCCTACTCTAGCTTGCCAGTTTTGGATGCAGTTCCCAGGTTGAGCCCGGGGATTTCACATTCAACTTAACAAACCACCTACGCGCGCTTTACGCCCAGTAATTCCGATTAACGCTTGCACCCTCTGTATTACCGCGGCTGCTGGCACAGAGTTAGCCGGTGCTTATTCTGTCGGTAACGTCAAAACAGCAAGGTATTCGCTTACTGCCCTTCCTCCCAACTTAAAGTGCTTTACAATCCGAAGACCTTCTTCACACACGCGGCATGGCTGGATCAGGCTTTCGCCCATTGTCCAATATTCCCCAC…	#N/A	#N/A	#N/A	#N/A	#N/A	#N/A
68	0	0	0	Pseudomonas sp. strain 2180 16S ribosomal RNA gene, partial sequence	#N/A	TGTCAGTATGAGCCCAGGTGGTCGCCTTCGCCACTGGTGTTCCTTCCTATATCTACGCATTTCACCGCTACACAGGAAATTCCACCACCCTCTGCCCTACTCTAGCTTGCCAGTTTTGGATGCAGTTCCCAGGTTGAGCCCGGGGATTTCACATTCAACTTAACAAACCACCTACGCGCGCTTTACGCCCAGTAATTCCGATTAACGCTTGCACCCTCTGTATTACCGCGGCTGCTGGCACAGAGTTAGCCGGTGCTTATTCTGTCGGTAACGTCAAAACAGCAAGGTATTCGCTTACTGCCCTTCCTCCCAACTTAAAGTGCTTTACAATCCGAAGACCTTCTTCACACACGCGGCATGGCTGGATCAGGCTTTCGCCCATTGTCCAATATTCCCCAC…	#N/A	#N/A	#N/A	#N/A	#N/A	#N/A
69	0	0	0	Pseudomonas sp. strain 2180 16S ribosomal RNA gene, partial sequence	#N/A	GTCAGTATGAGCCCAGGTGGTCGCCTTCGCCACTGGTGTTCCTTCCTATATCTACGCATTTCACCGCTACACAGGAAATTCCACCACCCTCTGCCCTACTCTAGCTTGCCAGTTTTGGATGCAGTTCCCAGGTTGAGCCCGGGGATTTCACATTCAACTTAACAAACCACCTACGCGCGCTTTACGCCCAGTAATTCCGATTAACGCTTGCACCCTCTGTATTACCGCGGCTGCTGGCACAGAGTTAGCCGGTGCTTATTCTGTCGGTAACGTCAAAACAGCAAGGTATTCGCTTACTGCCCTTCCTCCCAACTTAAAGTGCTTTACAATCCGAAGACCTTCTTCACACACGCGGCATGGCTGGATCAGGCTTTCGCCCATTGTCCAATATTCCCCACT…	#N/A	#N/A	#N/A	#N/A	#N/A	#N/A
70	0	0	0	0	#N/A	#N/A	#N/A	#N/A	#N/A	#N/A	#N/A	#N/A
71	0	0	0	Pseudomonas sp. strain 2180 16S ribosomal RNA gene, partial sequence	#N/A	GTCAGTATGAGCCCAGGTGGTCGCCTTCGCCACTGGTGTTCCTTCCTATATCTACGCATTTCACCGCTACACAGGAAATTCCACCACCCTCTGCCCTACTCTAGCTTGCCAGTTTTGGATGCAGTTCCCAGGTTGAGCCCGGGGATTTCACATTCAACTTAACAAACCACCTACGCGCGCTTTACGCCCAGTAATTCCGATTAACGCTTGCACCCTCTGTATTACCGCGGCTGCTGGCACAGAGTTAGCCGGTGCTTATTCTGTCGGTAACGTCAAAACAGCAAGGTATTCGCTTACTGCCCTTCCTCCCAACTTAAAGTGCTTTACAATCCGAAGACCTTCTTCACACACGCGGCATGGCTGGATCAGGCTTTCGCCCATTGTCCAATATTCCCCACT…	#N/A	#N/A	#N/A	#N/A	#N/A	#N/A
72	2	1	0	Citrobacter freundii complex strain ABFQG, complete genome	GGNCTTCGGNTTGTAAAGNACTTTCAGNNRGGAGGAAGGNGTTGTGGTTAATANCCNCANNNNTTGACGTTACTCNCAGAAKAAGCACCGGCTAACTCCGTGCCAGCAGCCGCGGTAATACNGAGGGTGCAAGCGTTAATCGGAATTACTGGGCGTAAAGCGCACGCAGGCGGTCTGTCAAGTCGGATGTGAAATCCCCGGGCTCAACCTGGGAACTGCATCCNAAACTGGCARGCTAGAGTCTTGTAGAGGGGGGTNGAATTNCAGGTGTAGCGGTGAAATGCGTAGANATCTGNAGGAATACCGGTGGCGAAGGCGNCCCCCTGGACNNAGACTGACGCTNAGGTGCGAAAGCGTGGGGAGCAAACAGGATTAGATA	#N/A	#N/A	#N/A	#N/A	#N/A	#N/A	#N/A
73	0	1	0	0	#N/A	#N/A	#N/A	#N/A	#N/A	#N/A	#N/A	#N/A
74	0	0	0	Citrobacter freundii strain CAU2094 16S ribosomal RNA gene, partial sequence	NCTTCGGNTTGTAAAGNACTTTCAGYKRGGAGGAAGGNGTTNTGGTTAATANCNNCANSNNTTGACGTTACTCNCAGAAKAAGCACCGGCTAACTCCGTGCCAGCAGCCGCGGTAATACNGAGGGTGCAAGCGTTAATCGGAATTACTGGGCGTAAAGCGCACGCAGGCGGTCTGTCAAGTCGNATGTGAAATCCCCGGGCTCAACCTGGGAACTGCATCCNAAACTGGCANGCTAGAGTCTTGTAGAGGGGGGTNGAATTCCAGGTGTAGCGGTGAAATGCGTAGANATCTGNAGGAANACCGGTGGCGAAGGCGNCCCCCTGGACNNANACTGACGCTNAGGTGCGAAAGCGTGGGGAGCAAACAGGATTAGATA	#N/A	#N/A	#N/A	#N/A	#N/A	#N/A	#N/A
75	2	0	0	0	#N/A	TTCCTNCNNATNTCTACGCATTTCACCGCTACACNNGNAATTCNACCCCCCTCTACCANACTCNAGNNTGNCAGTTTNNAATGCAGTTCCCAGGTTGAGCCCGGGGATTTCACATCNGACTTAACAAACCNCCTGCGCGCGCTTTACGCCCAGTAATTCCGATTAACGCTTGCACCCTCNGTATTACCGCGGCTGCTGGCACNGAGTTAGCCGGTGCTTNTTCTGTCNGTAACGTCAAAGCANGNANGTATTAAGTAANTGCCCTTCCTCCNGACTGAAAGTGCTTTACAANCCGAAGGCCTTCTTCANACACGCGGCATGGCTGNATCAGGCTTNCGCCCATTGNNCAATATTCCCCNCTGCTGCCCCCCGTAGGANC	#N/A	#N/A	#N/A	#N/A	#N/A	#N/A
76	0	1	0	0	#N/A	#N/A	#N/A	#N/A	#N/A	#N/A	#N/A	#N/A
77	0	1	0	0	#N/A	#N/A	#N/A	#N/A	#N/A	#N/A	#N/A	#N/A
78	1	0	0	Citrobacter freundii strain CitB chromosome, complete genome	AAGGNCTTCGGNTTGTAAAGNACTTTCAGYKRGGAGGAAGGNGTTNTGGTTAATANCCNCANNNNTTGACGTTACTCNCAGAANAAGCACCGGCTAACTCCGTGCCAGCAGCCGCGGTAATACNGAGGGTGCAAGCGTTAATCGGAATTACTGGGCGTAAAGCGCACGCAGGCGGTCTGTCAAGTCGGATGTGAAATCCCCGGGCTCAACCTGGGAACTGCATCCNAAACTGGCAGGCTAGAGTCTTGTAGAGGGGGGTAAAATTCCAGGTGTAGCGGTGAAATGCGTANANATCTGNAGGAANACCGGTGGCGAAGGCGNCCCCCTGGACNNAGACTGACNCTNAGGTGCGAAAGCGTGGGGAGCAAACAGGATTAGATACCCG	#N/A	#N/A	#N/A	#N/A	#N/A	#N/A	#N/A
79	2	1	0	Citrobacter freundii strain 52323CZ chromosome, complete genome	NCTTCGGNTTGTAAAGTACTTTCAGCNNGGAGGAAGGNGTTGTGGTTAATANCCNCANNNWTTGACGTTACTCNCAGAAKAAGCACCGGCTAACTCCGTGCCAGCAGCCGCGGTAATACNGAGGGTGCAAGCGTTAATCGGAATTACTGGGCGTAAAGCGCACGCAGGCGGTCTGTCAAGTCGGATGTGAAATCCCCGGGCTCAACCTGGGAACTGCATCCNAAACTGGCANGCTAGAGTCTTGTAGAGGGGGGTNGAATTCCAGGTGTAGCGGTGAAATGCGTAGANATCTGNAGGAATACCGGTGGCGAAGGCGNCCCCCTGGACNNANACTGACGCTCAGGTGCGAAAGCGTGGGGAGCAAACAGGATTAGATACCCNGGT	#N/A	#N/A	#N/A	#N/A	#N/A	#N/A	#N/A
80	2	0	0	Citrobacter freundii strain 52323CZ chromosome, complete genome	TGCCGCGTGTNTGAAGAAGGNCTTCGGNTTGTAAAGNACTTTCAGNNNGGAGGAAGGNGTTNTGGTTAATANCCGCANNNNTTGACGTTACTCNCAGAAKAAGCACCGGCTAACTCCGTGCCAGCAGCCGCGGTAATACNGAGGGTGCAAGCGTTAATCGGAATTACTGGGCGTAAAGCGCACGCAGGCGGTCTGTCAAGTCGGATGTGAAATCCCCGGGCTCAACCTGGGAACTGCATCCGAAACTGGCAGGCTAGAGTCTTGTAGAGGGGGGTAGAATTCCAGGTGTAGCGGTGAAATGCGTAGANATCTGNAGGAATACCGGTGGCGAAGGCGNCCCCCTGGACAAAGACTGACGCTCAGGTGCGAAAGCGTGGGGAGCAAACAGGATTAGATACC…	#N/A	#N/A	#N/A	#N/A	#N/A	#N/A	#N/A
81	2	1	0	0	#N/A	#N/A	#N/A	#N/A	#N/A	#N/A	#N/A	#N/A
82	0	0	0	0	#N/A	#N/A	#N/A	#N/A	#N/A	#N/A	#N/A	#N/A
83	0	1	0	0	#N/A	#N/A	#N/A	#N/A	#N/A	#N/A	#N/A	#N/A
84	0	0	0	Pantoea sp. strain YEx_03 16S ribosomal RNA gene, partial sequence	ATGCCGCGTGTATGAAGAAGGCCTTCGGGTTGTAAAGTACTTTCAGCGGGGAGGAAGGCGATGSGGTTAATAACCNNGTCGATTGACGTTACCCGCAGAAGAAGCACCGGCTAACTCCGTGCCAGCAGCCGCGGTAATACGGAGGGTGCAAGCGTTAATCGGAATTACTGGGCGTAAAGCGCACGCAGGCGGTCTGTTAAGTCAGATGTGAAATCCCCGGGCTTAACCTGGGAACTGCATTTGAAACTGGCAGGCTTGAGTCTTGTAGAGGGGGGTAGAATTCCAGGTGTAGCGGTGAAATGCGTAGAGATCTGGAGGAATACCGGTGGCGAAGGCGGCCCCCTGGACAAAGACTGACGCTCAGGTGCGAAAGCGTGGGGAGCAAACAGGATTANATACC	#N/A	#N/A	#N/A	#N/A	#N/A	#N/A	#N/A
85	2	2	0	Pantoea ananatis strain OsEp_Plm_30B2 16S ribosomal RNA gene, partial sequence	GCAGCCATGCCGCGTGTGTGAAGAAGGCCTTCGGGTTGTAAAGCACTTTCAGCGGGGAGGAAGGCGATAAGGTTAATAACCTTGTYGATTGACGTTACCCGCAGAAGAAGCACCGGCTAACTCCGTGCCAGCAGCCGCGGTAATACGGAGGGTGCGAGCGTTAATCGGAATTACTGGGCGTAAAGCGTACGCAGGCGGTCTGTTAAGTCAGATGTGAAATCCCCGGGCTTAACCCGGGAACTGCATTTGAAACTGGCAGGCTAGAGTCTCGTAGAGGGGGGTAGAATTCCAGGTGTAGCGGTGAAATGCGTAGAGATCTGGAGGAATACCGGTGGCGAAGGCGGCCCCCTGGACGAAGACTGACGCTCAGGTACGAAAGCGTGGGGAGCAAACAGGATT…	#N/A	#N/A	#N/A	#N/A	#N/A	#N/A	#N/A
86	0	0	0	Pantoea vagans strain PgBe307 16S ribosomal RNA gene, partial sequence	TGCCGCGTGTATGAAGAAGGCCTTCGGGTTGTAAAGTACTTTCAGCGGGGAGGAAGGCGATGSGGTTAATAACCNNGTCGATTGACGTTACCCGCAGAAGAAGCACCGGCTAACTCCGTGCCAGCAGCCGCGGTAATACGGAGGGTGCAAGCGTTAATCGGAATTACTGGGCGTAAAGCGCACGCAGGCGGTCTGTTAAGTCAGATGTGAAATCCCCGGGCTTAACCTGGGAACTGCATTTGAAACTGGCAGGCTTGAGTCTTGTAGAGGGGGGTAGAATTCCAGGTGTAGCGGTGAAATGCGTAGAGATCTGGAGGAATACCGGTGGCGAAGGCGGCCCCCTGGACAAAGACTGACGCTCAGGTGCGAAAGCGTGGGGAGCAAACAGGATTANATACC…	#N/A	#N/A	#N/A	#N/A	#N/A	#N/A	#N/A
87	0	0	0	Pantoea agglomerans strain K1 16S ribosomal RNA gene, partial sequence	ATGCCGCGTGTATGAAGAAGGCCTTCGGGTTGTAAAGTACTTTCAGCGGGGAGGAAGGCGATGSGGTTAATAACCNNGTCGATTGACGTTACCCGCAGAAGAAGCACCGGCTAACTCCGTGCCAGCAGCCGCGGTAATACGGAGGGTGCAAGCGTTAATCGGAATTACTGGGCGTAAAGCGCACGCAGGCGGTCTGTTAAGTCAGATGTGAAATCCCCGGGCTTAACCTGGGAACTGCATTTGAAACTGGCAGGCTTGAGTCTTGTAGAGGGGGGTAGAATTCCAGGTGTAGCGGTGAAATGCGTAGAGATCTGGAGGAATACCGGTGGCGAAGGCGGCCCCCTGGACAAAGACTGACGCTCAGGTGCGAAAGCGTGGGGAGCAAACAGGATTAGATAC…	#N/A	#N/A	#N/A	#N/A	#N/A	#N/A	#N/A
88	1	0	0	Pantoea agglomerans strain N6PI6 16S ribosomal RNA gene, partial sequence	TGCAGCCATGCCGCGTGTATGAAGAAGGCCTTCGGGTTGTAAAGTACTTTCAGCGGGGAGGAAGGCGATGNGGTTAATAACCSYGTCGATTGACGTTACCCGCAGAAGAAGCACCGGCTAACTCCGTGCCAGCAGCCGCGGTAATACGGAGGGTGCAAGCGTTAATCGGAATTACTGGGCGTAAAGCGCACGCAGGCGGTCTGTTAAGTCAGATGTGAAATCCCCGGGCTTAACCTGGGAACTGCATTTGAAACTGGCAGGCTTGAGTCTTGTAGAGGGGGGTAGAATTCCAGGTGTAGCGGTGAAATGCGTAGAGATCTGGAGGAATACCGGTGGCGAAGGCGGCCCCCTGGACAAAGACTGACGCTCAGGTGCGAAAGCGTGGGGAGCAAACAGGAT…	#N/A	#N/A	#N/A	#N/A	#N/A	#N/A	#N/A
89	1	0	0	Pantoea agglomerans strain BQC01 16S ribosomal RNA gene, partial sequence	GCAGCCATGCCGCGTGTATGAAGAAGGCCTTCGGGTTGTAAAGTACTTTCAGCGGGGAGGAAGGCGATGNGGTTAATAACCNNGTCGATTGACGTTACCCGCAGAAGAAGCACCGGCTAACTCCGTGCCAGCAGCCGCGGTAATACGGAGGGTGCAAGCGTTAATCGGAATTACTGGGCGTAAAGCGCACGCAGGCGGTCTGTTAAGTCAGATGTGAAATCCCCGGGCTTAACCTGGGAACTGCATTTGAAACTGGCAGGCTTGAGTCTTGTAGAGGGGGGTAGAATTCCAGGTGTAGCGGTGAAATGCGTAGAGATCTGGAGGAATACCGGTGGCGAAGGCGGCCCCCTGGACAAAGACTGACGCTCAGGTGCGAAAGCGTGGGGAGCAAACAGGATT…	#N/A	#N/A	#N/A	#N/A	#N/A	#N/A	#N/A
90	0	0	0	Pantoea agglomerans strain H242 16S ribosomal RNA gene, partial sequence	ATGCCGCGTGTATGAAGAAGGCCTTCGGGTTGTAAAGTACTTTCAGCGGGGAGGAAGGCGATGSGGTTAATAACCNNGTCGATTGACGTTACCCGCAGAAGAAGCACCGGCTAACTCCGTGCCAGCAGCCGCGGTAATACGGAGGGTGCAAGCGTTAATCGGAATTACTGGGCGTAAAGCGCACGCAGGCGGTCTGTTAAGTCAGATGTGAAATCCCCGGGCTTAACCTGGGAACTGCATTTGAAACTGGCAGGCTTGAGTCTTGTAGAGGGGGGTAGAATTCCAGGTGTAGCGGTGAAATGCGTAGAGATCTGGAGGAATACCGGTGGCGAAGGCGGCCCCCTGGACAAAGACTGACGCTCAGGTGCGAAAGCGTGGGGAGCAAACAGGATTAGATAC…	#N/A	#N/A	#N/A	#N/A	#N/A	#N/A	#N/A
91	1	0	0	Pantoea agglomerans strain KM1 16S ribosomal RNA gene, partial sequence	GCAGCCATGCCGCGTGTATGAAGAAGGCCTTCGGGTTGTAAAGTACTTTCAGCGGGGAGGAAGGCGATGSGGTTAATAACCNNGTCGATTGACGTTACCCGCAGAAGAAGCACCGGCTAACTCCGTGCCAGCAGCCGCGGTAATACGGAGGGTGCAAGCGTTAATCGGAATTACTGGGCGTAAAGCGCACGCAGGCGGTCTGTTAAGTCAGATGTGAAATCCCCGGGCTTAACCTGGGAACTGCATTTGAAACTGGCAGGCTTGAGTCTTGTAGAGGGGGGTAGAATTCCAGGTGTAGCGGTGAAATGCGTAGAGATCTGGAGGAATACCGGTGGCGAAGGCGGCCCCCTGGACAAAGACTGACGCTCAGGTGCGAAAGCGTGGGGAGCAAACAGGATT…	GCGTCAGTCTTTGTCCAGGGGGCCGCCTTCGCCACCGGTATTCCTCCAGATCTCTACGCATTTCACCGCTACACCTGGAATTCTACCCCCCTCTACAAGACTCAAGCCTGCCAGTTTCAAATGCAGTTCCCAGGTTAAGCCCGGGGATTTCACATCTGACTTAACAGACCGCCTGCGTGCGCTTTACGCCCAGTAATTCCGATTAACGCTTGCACCCTCCGTATTACCGCGGCTGCTGGCACGGAGTTAGCCGGTGCTTCTTCTGCGGGTAACGTCAATCGACNNGGTTATTAACCNCATCGCCTTCCTCCCCGCTGAAAGTACTTTACAACCCGAAGGCCTTCTTCATACACGCGGCATGGCTGCATCAGGCTTGCGCCCATTGTGCAATATTCCCCA…	#N/A	#N/A	#N/A	#N/A	#N/A	#N/A
92	0	0	0	Pantoea agglomerans strain H242 16S ribosomal RNA gene, partial sequence	TGCCGCGTGTATGAAGAAGGCCTTCGGGTTGTAAAGTACTTTCAGCGGGGAGGAAGGCGATGSGGTTAATAACCNNGTCGATTGACGTTACCCGCAGAAGAAGCACCGGCTAACTCCGTGCCAGCAGCCGCGGTAATACGGAGGGTGCAAGCGTTAATCGGAATTACTGGGCGTAAAGCGCACGCAGGCGGTCTGTTAAGTCAGATGTGAAATCCCCGGGCTTAACCTGGGAACTGCATTTGAAACTGGCAGGCTTGAGTCTTGTAGAGGGGGGTAGAATTCCAGGTGTAGCGGTGAAATGCGTAGAGATCTGGAGGAATACCGGTGGCGAAGGCGGCCCCCTGGACAAAGACTGACGCTCAGGTGCGAAAGCGTGGGGAGCAAACAGGATTAGATACC…	#N/A	#N/A	#N/A	#N/A	#N/A	#N/A	#N/A
93	2	4	3	Bacillus velezensis strain B268 chromosome, complete genome	CGGAGCACGCCGCGTGAGTGATGAAGGTTTTCGGATCGTAAAGCTCTGTTGTTAGGGAAGAACAAGTGCCGTTCAAATAGGGCGGCACCTTGACGGTACCTAACCAGAAAGCCACGGCTAACTACGTGCCAGCAGCCGCGGTAATACGTAGGTGGCAAGCGTTGTCCGGAATTATTGGGCGTAAAGGGCTCGCAGGCGGTTTCTTAAGTCTGATGTGAAAGCCCCCGGCTCAACCGGGGAGGGTCATTGGAAACTGGGGAACTTGAGTGCAGAAGAGGAGAGTGGAATTCCACGTGTAGCGGTGAAATGCGTAGAGATGTGGAGGAACACCAGTGGCGAAGGCGACTCTCTGGTCTGTAACTGACGCTGAGGAGCGAAAGCGTGGGGAGCGAACAGGAT…	AGTTACAGACCAGAGAGTCGCCTTCGCCACTGGTGTTCCTCCACATCTCTACGCATTTCACCGCTACACGTGGAATTCCACTCTCCTCTTCTGCACTCAAGTTCCCCAGTTTCCAATGACCCTCCCCGGTTGAGCCGGGGGCTTTCACATCAGACTTAAGAAACCGCCTGCGAGCCCTTTACGCCCAATAATTCCGGACAACGCTTGCCACCTACGTATTACCGCGGCTGCTGGCACGTAGTTAGCCGTGGCTTTCTGGTTAGGTACCGTCAAGGTGCCGCCCTATTTGAACGGCACTTGTTCTTCCCTAACAACAGAGCTTTACGATCCGAAAACCTTCATCACTCACGCGGCGTTGCTCCGTCAGACTTTCGTCCATTGCGGAAGATTCCCTACTGC…	TCCGGCGGTCTTCACGGTGTAGGGGCATCCGTCGTAAACGCCTTGTCGACCACTCTTGACGTTACGGTTCATCGTGACGGAAAAATCCATTATCAGGCGTACGAGCGCGGTGTACCTGTGGCCGATCTTGAAGTGATCGGCGAAACTGATAAGACCGGAACGATTACGCACTTCGTTCCGGACCCGGAAATTTTCAAAGAAACAACTGTATATGACTATGATCTGCTTTCAAACCGTGTCCGGGAATTGGCCTTCCTGACAAAAGGCGTAAACATCACGATTGAAGACAAACGTGAAGGACAAGAACGGAAAAACGAGTACCACTACGAAGGCGGAATCAAAAGCTATGTTGAGTACTTAAACCGTTCCAAAGAAGTCGTTCATGAAGAGCCGATTTAT…	TTAAAATCTTCTCCNATTCCKGTTCCGAGGGCCGTGATCATTGATCTGACCTCATTGTTTGAGAGAATCTTATCAAGTCTGGCTTTCTCAACGTTCAGAATCTTACCGCGCAGCGGCAGAATGGCTTGGAAATGACGGTCCCGTCCCTGTTTCGCTGATCCGCCCGCAGAGTCACCCTCTACGATATACAGCTCGGAAATGCTCGGATCTTTAGAAGAACAGTCCGCCAGTTTGCCCGGCAGATTGGAAATCTCAAGCGCACTTTTGCGCCGGGTCAATTCCCGGGCTTTTTTCGCCGCCATCCGCGCTCTTGCGGCCATTAAACCTTTTTCAACGATTTTGCGGGCTGAGTCCGGATTTTCAAGAAGGAATGTTTCCAGCGCAGAAGAAAACAGCGTA…	GCTGTCGTTGTATTGCAATGCAACTTCAACCGTTATGCCGTCTTTCTCGCCTTCNATATAAATCGGCTCTTCATGAACGACTTCTTTGGAACGGTTTAAGTACTCAACATAGCTTTTGATTCCGCCTTCGTAGNGGTACTCGTTTTTCCGTTCTTGTCCTTCACGTTTGTCTTCAATCGNGATGTTTACNCCTTTTGTCAGGAAGGCCAATTCCCGGACACGGTTTGAAAGCANATCATAGTCATATACAGTTGTTTCTTTGAAAATTTCCGGGTCCGGAACNAAGNGCGTAATCGTTCCGGTCTTATCAGTTTCNCCNATCACTTCAANATCGGCCACAGGTACACCGCGCTCGTACGCCTGATAATGGATTTTTCCGTCACNATGAACCGTAACGTC…	TGCTTGTATAGCTGTCGTTGTATTGCAATGCAACTTCAACCGTTATGCCGTCTTTCTCGCCTTCNATATAAATCGGCTCTTCATGAACGACTTCTTTGGAACGGTTTAAGTACTCAACATAGCTTTTGATTCCGCCTTCGTAGNGGTACTCGTTTTTCCGTTCTTGTCCTTCACGTTTGTCTTCAATCGNGATGTTTACNCCTTTTGTCAGGAAGGCCAATTCCCGGACACGGTTTGAAAGCANATCATAGTCATATACAGTTGTTTCTTTGAAAATTTCCGGGTCCGGAACNAAGTGCGTAATCGTTCCGGTCTTATCANTTTCNCCNATCACTTCAANATCGGCCACAGGTACNCCGCGCTCGTACNCCTGATAANGGATTTTTCCGTCACNATGAA…	#N/A	#N/A
94	0	0	0	Rahnella victoriana strain BL03NL1M2 16S ribosomal RNA gene, partial sequence	GCAGCCATGCCGCGTGTGTGAAGAAGGCCTTAGGGTTGTAAAGCACTTTCAGCGAGGAGGAAGGGTTCAGTGTTAATAGCACTGAACATTGACGTTACTCGCAGAAGAAGCACCGGCTAACTCCGTGCCAGCAGCCGCGGTAATACGGAGGGTGCAAGCGTTAATCGGAATTACTGGGCGTAAAGCGCACGCAGGCGGTTTGTTAAGTCAGATGTGAAATCCCCGAGCTTAACTTGGGAACTGCATTTGAAACTGGCAAGCTAGAGTCTTGTAGAGGGGGGTAGAATTCCAGGTGTAGCGGTGAAATGCGTAGAGATCTGGAGGAATACCGGTGGCGAAGGCGGCCCCCTGGACAAAGACTGACGCTCAGGTGCGAAAGCGTGGGGAGCAAACAGGATT…	#N/A	#N/A	#N/A	#N/A	#N/A	#N/A	#N/A
95	0	0	0	0	#N/A	#N/A	#N/A	#N/A	#N/A	#N/A	#N/A	#N/A
96	0	0	0	Pseudomonas rhodesiae strain NL2019 chromosome, complete genome	TGCCGCGTGTGTGAAGAAGGTCTTCGGATTGTAAAGCACTTTAAGTTGGGAGGAAGGGCCATTACCTAATACGTGATGGTYTTGACGTTACCGACAGAATAAGCACCGGCTAACTCTGTGCCAGCAGCCGCGGTAATACAGAGGGTGCAAGCGTTAATCGGAATTACTGGGCGTAAAGCGCGCGTAGGTGGTTTGTTAAGTTGGATGTGAAATCCCCGGGCTCAACCTGGGAACTGCATTCAAAACTGACTGACTAGAGTATGGTAGAGGGTGGTGGAATTTCCTGTGTAGCGGTGAAATGCGTAGATATAGGAAGGAACACCAGTGGCGAAGGCGACCACCTGGACTGATACTGACACTGAGGTGCGAAAGCGTGGGGAGCAAACAGGATTAGATACC…	#N/A	#N/A	#N/A	#N/A	#N/A	#N/A	#N/A
97	0	0	0	Rahnella victoriana strain BL03NL1M2 16S ribosomal RNA gene, partial sequence	GAAGGCCTTNGGNTTGTAAAGCACTTTCAGCGNGGAGGAAGGGTTCANTGTTAATASNNCTGAACNTTGACGTTACTCNCAGAANAAGCACCGGCTAACTCCGTGCCAGCAGCCGCGGTAATACNGAGGGTGCAAGCGTTAATCGGAATTACTGGGCGTAAAGCGCACGCAGGCGGTTTGTTAAGTCAGATGTGAAATCCCCGAGCTTAACTTGGGAACTGCATTTGAAACTGGCAAGCTAGAGTCTTGTAGAGGGGGGTAGAATTCCAGGTGTAGCGGTGAAATGCGTAGAGATCTGGAGGAATACCGGTGGCGAAGGCGGCCCCCTGGACAAAGACTGACGCTCAGGTGCGAAAGCGTGGGGAGCAAACAGGATTANATACCCCGGTAGT	#N/A	#N/A	#N/A	#N/A	#N/A	#N/A	#N/A
98	0	0	0	Pseudomonas sp. strain COR18 16S ribosomal RNA gene, partial sequence	TTGTAAAGCACTTTMAGNTGGGAGGAAGGGTTNTTNGTTAATACNNNTNNNNNTTGACGTTACCNACAGAATAAGCACCGGCTAACTCTGTGCCAGCAGCCGCGGTAATACNGAGGGTGCAAGCGTTAATCGGAATTACTGGGCGTAAAGCGCGCG	#N/A	#N/A	#N/A	#N/A	#N/A	#N/A	#N/A
99	1	0	0	Pseudomonas sp. strain B25 16S ribosomal RNA gene, partial sequence	GGTCTTCGGATTGTAAAGCACTTTAAGTTGGGAGGAAGGGTTGTAGATTAATACTCTGCAATTTTGACGTTACCGACAGAATAAGCACCGGCTAACTCTGTGCCAGCAGCCGCGGTAATACAGAGGGTGCAAGCGTTAATCGGAATTACTGGGCGTAAAGCGCGCGTAGGTGGTTTGTTAAGTTGGATGTGAAATCCCCGGGCTCAACCTGGGAACTGCATTCAAAACTGACTGACTAGAGTATGGTAGAGGGTGGTGGAATTTCCTGTGTAGCGGTGAAATGCGTAGATATAGGAAGGAACACCAGTGGCGAAGGCGACCACCTGGACTRATACTGACACTGAGGTGCGAAAGCGTGGGGAGCAAACAGGATTAGATACCCNGGGTAGTC	NAGTCCAGGTGGTCGCCTTCGCCACTGGTGTTCCTTCCTATATCTACGCATTTCACCGCTACACAGGAAATTCCACCACCCTCTACCATACTCTAGTCAGTCAGTTTTGAATGCAGTTCCCAGGTTGAGCCCGGGGATTTCACATCCAACTTAACAAACCACCTACGCGCGCTTTACGCCCAGTAATTCCGATTAACGCTTGCACCCTCTGTATTACCGCGGCTGCTGGCACAGAGTTAGCCGGTGCTTATTCTGTCGGTAACGTCAAAATTGCAGAGTATTAATCTACAACCCTTCCTCCCAACTTAAAGTGCTTTACAATCCGAAGACCTTCTTCACACACGCGGCATGGCTGGATCAGGCTTTCGCCCATTGTCCAATATTCCCCACTGCTGCCCC…	#N/A	#N/A	#N/A	#N/A	#N/A	#N/A
100	1	0	0	Rosenbergiella nectarea strain M75 16S ribosomal RNA gene, partial sequence	TGCAGCCATGCCGCGTGTATGAAGAAGGCCTTCGGGTTGTAAAGTACTTTCAGTCAGGAGGAAGGGTGTGAAATTAATACTTTCATGCATTGACGTTACTGACAGAAGAAGCACCGGCTAACTCCGTGCCAGCAGCCGCGGTAATACGGAGGGTGCAAGCGTTAATCGGAATTACTGGGCGTAAAGCGCACGCAGGCGGTTTGTTAAGTCAGATGTGAAATCCCCGGGCTCAACCTGGGAACTGCATTTGAAACTGGCAAGCTTGAGTCTTGTAGAGGGGGGTAGAATTCCAGGTGTAGCGGTGAAATGCGTAGAGATCTGGAGGAATACCGGTGGCGAAGGCGGCCCCCTGGACAAAGACTGACGCTCAGGTGCGAAAGCGTGGGGAGCAAACAGGAT…	#N/A	#N/A	#N/A	#N/A	#N/A	#N/A	#N/A
101	0	0	0	Pantoea agglomerans strain ASB05 chromosome, complete genome	GCCATGCCGCGTGTATGAAGAAGGCCTTCGGGTTGTAAAGTACTTTCAGCGGGGAGGAAGGCGATGSGGTTAATAACCNNGTCGATTGACGTTACCCGCAGAAGAAGCACCGGCTAACTCCGTGCCAGCAGCCGCGGTAATACGGAGGGTGCAAGCGTTAATCGGAATTACTGGGCGTAAAGCGCACGCAGGCGGTCTGTTAAGTCAGATGTGAAATCCCCGGGCTTAACCTGGGAACTGCATTTGAAACTGGCAGGCTTGAGTCTTGTAGAGGGGGGTAGAATTCCAGGTGTAGCGGTGAAATGCGTAGAGATCTGGAGGAATACCGGTGGCGAAGGCGGCCCCCTGGACAAAGACTGACGCTCAGGTGCGAAAGCGTGGGGAGCAAACAGGATTAGA…	#N/A	#N/A	#N/A	#N/A	#N/A	#N/A	#N/A
102	0	0	0	Bacillus cereus strain PJHDRD2 16S ribosomal RNA gene, partial sequence	TGAAGGCTTTCGGGTCGTAAAACTCTGTTGTTAGGGAAGAACAAGTGCTAGTTGAATAAGCTGGCACCTTGACGGTACCTAACCAGAAAGCCACGGCTAACTACGTGCCAGCAGCCGCGGTAATACGTAGGTGGCAAGCGTTATCCGGAATTATTGGGCGTAAAGCGCGCGCAGGTGGTTTCTTAAGTCTGATGTGAAAGCCCACGGCTCAACCGTGGAGGGTCATTGGAAACTGGGAGACTTGAGTGCAGAAGAGGAAAGTGGAATTCCATGTGTAGCGGTGAAATGCGTANAGATATGGAGGAACACCAGTGGCGAAGGCGACTTTCTGGTCTGTAACTGACACTGAGGCGCGAAAGCGTGGGGAGCAAACAGGATTANATAC	#N/A	#N/A	#N/A	#N/A	#N/A	#N/A	#N/A
103	3	1	0	Rosenbergiella nectarea strain ST23 16S ribosomal RNA gene, partial sequence	TCGGNTTGTAAAGNACTTTCAGTNGGGAGGAAGGGNGNNNANTTAATACTTNNNTGTTTGACGTTACNGACANAANAAGCACCGGCTAACTCNGTGCCAGCAGCCGCGGTAATACGGAGGGTGCAAGCGTTAATCGGAATTACTGGGCGTAAAGCGCNCGCAGGNGGTTTGTTAAGTNNGATGTGAAATCCCCGGGCTCAACCTGGGAACTGCATTT	#N/A	#N/A	#N/A	#N/A	#N/A	#N/A	#N/A
104	0	1	0	Bacillus paramycoides strain DT-85 16S ribosomal RNA gene, partial sequence	GAGTGATGAAGGCTTTCGGGTCGTAAAACTCTGTTGTTAGGGAAGAACAAGTGCTAGTTGAATAAGCTGGCACCTTGACGGTACCTAACCAGAAAGCCACGGCTAACTACGTGCCAGCAGCCGCGGTAATACGTAGGTGGCAAGCGTTATCCGGAATTATTGGGCGTAAAGCGCGCGCAGGTGGTTTCTTAAGTCTGATGTGAAAGCCCACGGCTCAACCGTGGAGGGTCATTGGAAACTGGGAGACTTGAGTGCAGAAGAGGAAAGTGGAATTCCATGTGTAGCGGTGAAATGCGTAGAGATATGGAGGAACNCCAGTGGCGAAGGCGACTTTCTGGTCTGTAACTGACACTGAGGCGCGAAAGCGTGGGGAGCAAACAGGATTAGATACCCNAGTAG	#N/A	#N/A	#N/A	#N/A	#N/A	#N/A	#N/A
105	0	1	0	Bacillus sp. (in: Bacteria) strain L18 16S ribosomal RNA gene, partial sequence	CCGCGTGAGTGATGAAGGCTTTCGGGTCGTAAAACTCTGTTGTTAGGGAAGAACAAGTGCTAGTTGAATAAGCTGGCACCTTGACGGTACCTAACCAGAAAGCCACGGCTAACTACGTGCCAGCAGCCGCGGTAATACGTAGGTGGCAAGCGTTATCCGGAATTATTGGGCGTAAAGCGCGCGCAGGTGGTTTCTTAAGTCTGATGTGAAAGCCCACGGCTCAACCGTGGAGGGTCATTGGAAACTGGGAGACTTGAGTGCAGAAGAGGAAAGTGGAATTCCATGTGTAGCGGTGAAATGCGTAGAGATATGGAGGAACACCAGTGGCGAAGGCGACTTTCTGGTCTGTAACTGACACTGAGGCGCGAAAGCGTGGGGAGCAAACAGGATTAGATACCC…	#N/A	#N/A	#N/A	#N/A	#N/A	#N/A	#N/A
106	0	2	0	Bacillus cereus strain SERA2 16S ribosomal RNA gene, partial sequence	GGAGCACGCCGCGTGAGTGATGAAGGCTTTCGGGTCGTAAAACTCTGTTGTTAGGGAAGAACAAGTGCTAGTTGAATAAGCTGGCACCTTGACGGTACCTAACCAGAAAGCCACGGCTAACTACGTGCCAGCAGCCGCGGTAATACGTAGGTGGCAAGCGTTATCCGGAATTATTGGGCGTAAAGCGCGCGCAGGTGGTTTCTTAAGTCTGATGTGAAAGCCCACGGCTCAACCGTGGAGGGTCATTGGAAACTGGGAGACTTGAGTGCAGAAGAGGAAAGTGGAATTCCATGTGTAGCGGTGAAATGCGTAGAGATATGGAGGAACACCAGTGGCGAAGGCGACTTTCTGGTCTGTAACTGACACTGAGGCGCGAAAGCGTGGGGAGCAAACAGGATT…	#N/A	#N/A	#N/A	#N/A	#N/A	#N/A	#N/A
107	2	1	0	0	#N/A	#N/A	#N/A	#N/A	#N/A	#N/A	#N/A	#N/A
108	2	1	0	0	#N/A	#N/A	#N/A	#N/A	#N/A	#N/A	#N/A	#N/A
109	0	0	0	Rosenbergiella nectarea strain M75 16S ribosomal RNA gene, partial sequence	GTNTGAAGAAGGNCTTCGGGTTGTAAAGNACTTTCAGNCNGGAGGAAGGGTGTGAANTTAATACTTTCNTGCATTGACGTTACNGACAGAAGAAGCACCGGCTAACTCCGTGCCAGCAGCCGCGGTAATACGGAGGGTGCAAGCGTTAATCGGAATTACTGGGCGTAAAGCGCACGCAGGCGGTTTGTTAAGTCAGATGTGAAATCCCCGGGCTNAACCTGGGAACTGCATTTGAAACTGGCAAGCTTGAGTCTTGTAGAGGGGGGTAGAATTCCAGGTGTAGCGGTGAAATGCGTANAGATCTGGAGGAATACCGGTGGCGAAGGCGGCCCCCTGGACAAAGACTGACGCTCAGGTGCGAAAGCGTGGGGAGCAAACAGGATTAGATACCCCAN	#N/A	#N/A	#N/A	#N/A	#N/A	#N/A	#N/A
110	1	1	0	0	#N/A	#N/A	#N/A	#N/A	#N/A	#N/A	#N/A	#N/A
111	0	0	0	Bacillus cereus strain SERA2 16S ribosomal RNA gene, partial sequence	GAGCACGCCGCGTGAGTGATGAAGGCTTTCGGGTCGTAAAACTCTGTTGTTAGGGAAGAACAAGTGCTAGTTGAATAAGCTGGCACCTTGACGGTACCTAACCAGAAAGCCACGGCTAACTACGTGCCAGCAGCCGCGGTAATACGTAGGTGGCAAGCGTTATCCGGAATTATTGGGCGTAAAGCGCGCGCAGGTGGTTTCTTAAGTCTGATGTGAAAGCCCACGGCTCAACCGTGGAGGGTCATTGGAAACTGGGAGACTTGAGTGCAGAAGAGGAAAGTGGAATTCCATGTGTAGCGGTGAAATGCGTAGAGATATGGAGGAACACCAGTGGCGAAGGCGACTTTCTGGTCTGTAACTGACACTGAGGCGCGAAAGCGTGGGGAGCAAACAGGATTA…	#N/A	#N/A	#N/A	#N/A	#N/A	#N/A	#N/A
112	0	2	0	Rosenbergiella nectarea strain M75 16S ribosomal RNA gene, partial sequence	ATGCCGCGTGTATGAAGAAGGCCTTCGGGTTGTAAAGTACTTTCAGTCAGGAGGAAGGGTGTGAAATTAATACTTTCATGCATTGACGTTACTGACAGAAGAAGCACCGGCTAACTCCGTGCCAGCAGCCGCGGTAATACGGAGGGTGCAAGCGTTAATCGGAATTACTGGGCGTAAAGCGCACGCAGGCGGTTTGTTAAGTCAGATGTGAAATCCCCGGGCTCAACCTGGGAACTGCATTTGAAACTGGCAAGCTTGAGTCTTGTAGAGGGGGGTAGAATTCCAGGTGTAGCGGTGAAATGCGTANAGATCTGGAGGAATACCGGTGGCGAAGGCGGCCCCCTGGACAAAGACTGACGCTCAGGTGCGAAAGCGTGGGGAGCAAACAGGATTANATAC…	#N/A	#N/A	#N/A	#N/A	#N/A	#N/A	#N/A
113	2	0	0	Rosenbergiella nectarea strain M75 16S ribosomal RNA gene, partial sequence	CCATGCCGCGTGTATGAAGAAGGCCTTCGGGTTGTAAAGTACTTTCAGTCAGGAGGAAGGGTGTGAAATTAATACTTTCATGCATTGACGTTACTGACAGAAGAAGCACCGGCTAACTCCGTGCCAGCAGCCGCGGTAATACGGAGGGTGCAAGCGTTAATCGGAATTACTGGGCGTAAAGCGCACGCAGGCGGTTTGTTAAGTCAGATGTGAAATCCCCGGGCTCAACCTGGGAACTGCATTTGAAACTGGCAAGCTTGAGTCTTGTAGAGGGGGGTAGAATTCCAGGTGTAGCGGTGAAATGCGTAGAGATCTGGAGGAATACCGGTGGCGAAGGCGGCCCCCTGGACAAAGACTGACGCTCAGGTGCGAAAGCGTGGGGAGCAAACAGGATTAGAT…	#N/A	#N/A	#N/A	#N/A	#N/A	#N/A	#N/A
114	0	0	0	0	#N/A	#N/A	#N/A	#N/A	#N/A	#N/A	#N/A	#N/A
115	0	4	0	Bacillus cereus partial 16S rRNA gene, isolate RZ9	GGAGCACGCCGCGTGAGTGATGAAGGCTTTCGGGTCGTAAAACTCTGTTGTTAGGGAAGAACAAGTGCTAGTTGAATAAGCTGGCACCTTGACGGTACCTAACCAGAAAGCCACGGCTAACTACGTGCCAGCAGCCGCGGTAATACGTAGGTGGCAAGCGTTATCCGGAATTATTGGGCGTAAAGCGCGCGCAGGTGGTTTCTTAAGTCTGATGTGAAAGCCCACGGCTCAACCGTGGAGGGTCATTGGAAACTGGGAGACTTGAGTGCAGAAGAGGAAAGTGGAATTCCATGTGTAGCGGTGAAATGCGTAGAGATATGGAGGAACACCAGTGGCGAAGGCGACTTTCTGGTCTGTAACTGACACTGAGGCGCGAAAGCGTGGGGAGCAAACAGGATT…	GTCAGTTACAGACCAGAAAGTCGCCTTCGCCACTGGTGTTCCTCCATATCTCTACGCATTTCACCGCTACACATGGAATTCCACTTTCCTCTTCTGCACTCAAGTCTCCCAGTTTCCAATGACCCTCCACGGTTGAGCCGTGGGCTTTCACATCAGACTTAAGAAACCACCTGCGCGCGCTTTACGCCCAATAATTCCGGATAACGCTTGCCACCTACGTATTACCGCGGCTGCTGGCACGTAGTTAGCCGTGGCTTTCTGGTTAGGTACCGTCAAGGTGCCAGCTTATTCAACTAGCACTTGTTCTTCCCTAACAACAGAGTTTTACGACCCGAAAGCCTTCATCACTCACGCGGCGTTGCTCCGTCAGACTTTCGTCCATTGCGGAAGATTCCCTAC…	#N/A	#N/A	#N/A	#N/A	#N/A	#N/A
116	0	0	0	Bacillus sp. (in: Bacteria) strain ESA 657 16S ribosomal RNA gene, partial sequence	CACGCCGCGTGAGTGATGAAGGCTTTCGGGTCGTAAAACTCTGTTGTTAGGGAAGAACAAGTGCTAGTTGAATAAGCTGGCACCTTGACGGTACCTAACCAGAAAGCCACGGCTAACTACGTGCCAGCAGCCGCGGTAATACGTAGGTGGCAAGCGTTATCCGGAATTATTGGGCGTAAAGCGCG	#N/A	#N/A	#N/A	#N/A	#N/A	#N/A	#N/A
117	1	0	0	0	#N/A	#N/A	#N/A	#N/A	#N/A	#N/A	#N/A	#N/A
118	4	2	0	Metschnikowia sp. 11-1120 clone Ian5 18S ribosomal RNA gene, partial sequence; internal transcribed spacer 1, 5.8S ribosomal RNA gene, and internal transcribed spacer 2, complete sequence; and 28S ribosomal RNA gene, partial sequence	#N/A	#N/A	#N/A	#N/A	#N/A	#N/A	AGNCTGGGGCTAAAACTTATTCTAGCGCCGTTGATATTAGGCCGAAGCAGGACCAAACCGGAGGTTTGAGAGTAAATATCGCTCACCCACGCATGCCCTGGGGAATACCCCGGGGCGCAATGTGCGTTCAAAGATTCAATGATTCACGTCTGCAAGTCATATTACGTATCGCAATTCGCTGCGTTCTTCATCGATGCGAGAACCAAGAGATCCGTTGTTGAAAGTTTTTTWAWNNANTWWTTGACGGTTAAGATTTAGAGTTTGTGCCTAAAAGGGTGTAAAAACAATNTTAATGATCCTTCCGCAGGTTCACCTACGGAAACCTTGTTACGACTTTTACTTCCAAA	#N/A
119	0	2	0	Bacillus sp. strain KGS-25-12 16S ribosomal RNA gene, partial sequence	CAACGCCGCGTGAGTGATGAAGGCTTTCGGGTCGTAAAACTCTGTTGTTAGGGAAGAACAAGTGCTAGTTGAATAAGCTGGCACCTTGACGGTACCTAACCAGAAAGCCACGGCTAACTACGTGCCAGCAGCCGCGGTAATACGTAGGTGGCAAGCGTTATCCGGAATTATTGGGCGTAAAGCGCGCGCAGGTGGTTTCTTAAGTCTGATGTGAAAGCCCACGGCTCAACCGTGGAGGGTCATTGGAAACTGGGAGACTTGAGTGCAGAAGAGGAAAGTGGAATTCCATGTGTAGCGGTGAAATGCGTAGAGATATGGAGGAACACCAGTGGCGAAGGCGACTTTCTGGTCTGTAACTGACACTGAGGCGCGAAAGCGTGGGGAGCAAACAGGATTAGA…	#N/A	#N/A	#N/A	#N/A	#N/A	#N/A	#N/A
120	0	2	0	Bacillus sp. (in: Bacteria) strain RP11 16S ribosomal RNA gene, partial sequence	GGAGCACGCCGCGTGAGTGATGAAGGCTTTCGGGTCGTAAAACTCTGTTGTTAGGGAAGAACAAGTGCTAGTTGAATAAGCTGGCACCTTGACGGTACCTAACCAGAAAGCCACGGCTAACTACGTGCCAGCAGCCGCGGTAATACGTAGGTGGCAAGCGTTATCCGGAATTATTGGGCGTAAAGCGCGCGCAGGTGGTTTCTTAAGTCTGATGTGAAAGCCCACGGCTCAACCGTGGAGGGTCATTGGAAACTGGGAGACTTGAGTGCAGAAGAGGAAAGTGGAATTCCATGTGTAGCGGTGAAATGCGTAGAGATATGGAGGAACACCAGTGGCGAAGGCGACTTTCTGGTCTGTAACTGACACTGAGGCGCGAAAGCGTGGGGAGCAAACAGGATT…	#N/A	#N/A	#N/A	#N/A	#N/A	#N/A	#N/A
121	0	0	0	0	#N/A	#N/A	#N/A	#N/A	#N/A	#N/A	#N/A	#N/A
122	0	0	0	0	#N/A	#N/A	#N/A	#N/A	#N/A	#N/A	#N/A	#N/A
123	0	0	0	Pseudomonas rhodesiae strain NL2019 chromosome, complete genome	ATGCCGCGTGTGTGAAGAAGGTCTTCGGATTGTAAAGCACTTTAAGTTGGGAGGAAGGGCCATTACCTAATACGTGATGGTYTTGACGTTACCGACAGAATAAGCACCGGCTAACTCTGTGCCAGCAGCCGCGGTAATACAGAGGGTGCAAGCGTTAATCGGAATTACTGGGCGTAAAGCGCGCGTAGGTGGTTTGTTAAGTTGGATGTGAAATCCCCGGGCTCAACCTGGGAACTGCATTCAAAACTGACTGACTAGAGTATGGTAGAGGGTGGTGGAATTTCCTGTGTAGCGGTGAAATGCGTAGATATAGGAAGGAACACCAGTGGCGAAGGCGACCACCTGGACTGATACTGACACTGAGGTGCGAAAGCGTGGGGAGCAAACAGGATTAGATAC…	#N/A	#N/A	#N/A	#N/A	#N/A	#N/A	#N/A
124	3	4	2	Bacillus velezensis strain B268 chromosome, complete genome	GCACGCCGCGTGAGTGATGAAGGTTTTCGGATCGTAAAGCTCTGTTGTTAGGGAAGAACAAGTGCCGTTCAAATAGGGCGGCACCTTGACGGTACCTAACCAGAAAGCCACGGCTAACTACGTGCCAGCAGCCGCGGTAATACGTAGGTGGCAAGCGTTGTCCGGAATTATTGGGCGTAAAGGGCTCGCAGGCGGTTTCTTAAGTCTGATGTGAAAGCCCCCGGCTCAACCGGGGAGGGTCATTGGAAACTGGGGAACTTGAGTGCAGAAGAGGAGAGTGGAATTCCACGTGTAGCGGTGAAATGCGTAGAGATGTGGAGGAACACCAGTGGCGAAGGCGACTCTCTGGTCTGTAACTGACGCTGAGGAGCGAAAGCGTGGGGAGCGAACAGGATTAGA…	AGTTACAGACCAGAGAGTCGCCTTCGCCACTGGTGTTCCTCCACATCTCTACGCATTTCACCGCTACACGTGGAATTCCACTCTCCTCTTCTGCACTCAAGTTCCCCAGTTTCCAATGACCCTCCCCGGTTGAGCCGGGGGCTTTCACATCAGACTTAAGAAACCGCCTGCGAGCCCTTTACGCCCAATAATTCCGGACAACGCTTGCCACCTACGTATTACCGCGGCTGCTGGCACGTAGTTAGCCGTGGCTTTCTGGTTAGGTACCGTCAAGGTGCCGCCCTATTTGAACGGCACTTGTTCTTCCCTAACAACAGAGCTTTACGATCCGAAAACCTTCATCACTCACGCGGCGTTGCTCCGTCAGACTTTCGTCCATTGCGGAAGATTCCCTACTGC…	TCCGGCGGTCTTCACGGTGTAGGGGCATCCGTCGTAAACGCCTTGTCGACCACTCTTGACGTTACGGTTCATCGTGACGGAAAAATCCATTATCAGGCGTACGAGCGCGGTGTACCTGTGGCCGATCTTGAAGTGATCGGCGAAACTGATAAGACCGGAACGATTACGCACTTCGTTCCGGACCCGGAAATTTTCAAAGAAACAACTGTATATGACTATGATCTGCTTTCAAACCGTGTCCGGGAATTGGCCTTCCTGACAAAAGGCGTAAACATCACGATTGAAGACAAACGTGAAGGACAAGAACGGAAAAACGAGTACCACTACGAAGGCGGAATCAAAAGCTATGTTGAGTACTTAAACCGTTCCAAAGAAGTCGTTCATGAAGAGCCGATTTAT…	ATANGCGCTTTTTCAGATTAAAATCTTCTCCRAWTCCKGTTCCGAGGGCCGTGATCATTGATCTGACCTCATTGTTTGAGAGAATCTTATCAAGTCTGGCTTTCTCAACGTTCAGAATCTTACCGCGCAGCGGCAGAATGGCTTGGAAATGACGGTCCCGTCCCTGTTTCGCTGATCCGCCCGCAGAGTCACCCTCTACGATATACAGCTCGGAAATGCTCGGATCTTTAGAAGAACAGTCCGCCAGTTTGCCCGGCAGATTGGAAATCTCAAGCGCACTTTTGCGCCGGGTCAATTCCCGGGCTTTTTTCGCCGCCATCCGCGCTCTTGCGGCCATTAAACCTTTTTCAACGATTTTGCGGGCTGAGTCCGGATTTTCAAGAAGGAATGTTTCCAGCG…	#N/A	TTGTATAGCTGTCGTTGTATTGCAATGCAACTTCAACCGTTATGCCGTCTTTCTCGCCTTCGATATAAATCGGCTCTTCATGAACGACTTCTTTGGAACGGTTTAAGTACTCAACATAGCTTTTGATTCCGCCTTCGTAGTGGTACTCGTTTTTCCGTTCTTGTCCTTCACGTTTGTCTTCAATCGTGATGTTTACNCCTTTTGTCAGGAAGGCCAATTCCCGGACACGGTTTGAAAGCANATCATAGTCATATACAGTTGTTTCTTTGAAAATTTCCGGGTCCGGAACGAAGTGCGTAATCGTTCCGGTCTTATCAGTTTCGCCNATCACTTCAAGATCGGCCACAGGTACACCGCGCTCGTACGCCTGATAATGGATTTTTCCGTCACGATGAACCG…	#N/A	#N/A
125	0	2	0	0	#N/A	#N/A	#N/A	#N/A	#N/A	#N/A	#N/A	#N/A
126	0	1	0	0	#N/A	#N/A	#N/A	#N/A	#N/A	#N/A	#N/A	#N/A
127	0	0	0	Bacillus sp. (in: Bacteria) strain ESA 657 16S ribosomal RNA gene, partial sequence	TCTGACGGAGCACGCCGCGTGAGTGATGAAGGCTTTCGGGTCGTAAAACTCTGTTGTTAGGGAAGAACAAGTGCTAGTTGAATAAGCTGGCACCTTGACGGTACCTAACCAGAAAGCCACGGCTAACTACGTGCCAGCAGCCGCGGTAATACGTAGGTGGCAAGCGTTATCCGGAATTATTGGGCGTAAAGCGCGCGCAGGTGGTTTCTTAAGTCTGATGTGAAAGCCCACGGCTCAACCGTGGAGGGTCATTGGAAACTGGGAGACTTGAGTGCAGAAGAGGAAAGTGGAATTCCATGTGTAGCGGTGAAATGCGTAGAGATATGGAGGAACACCAGTGGCGAAGGCGACTTTCTGGTCTGTAACTGACACTGAGGCGCGAAAGCGTGGGGAGCAAAC…	#N/A	#N/A	#N/A	#N/A	#N/A	#N/A	#N/A
128	0	1	0	Rosenbergiella nectarea strain ST23 16S ribosomal RNA gene, partial sequence	ATGCCGCGTGTNTGAAGAAGGCCTTCGGNTTGTAAAGNACTTTCAGTCNGGAGGAAGGGTGTGAAATTAATACTTTCNTGCATTGACGTTACTGACAGAANAAGCACCGGCTAACTCCGTGCCAGCAGCCGCGGTAATACGGAGGGTGCAAGCGTTAATCGGAATTACTGGGCGTAAAGCGCACGCAGGCGGTTTGTTAAGTNNGATGTGAAATCCCCGGGCTCAACCTGGGAACTGCATTTGAAACTGNCNNGCTTGAGTCTNGTAGAGGGGGGTNGAATTCCAGGTGTAGCGGTGAAATGCGTANANATCTGNAGGAATACCGGTGGCGAAGGCGNCCCCCTGGACNNANACTGACGCTNAGGTGCGAAAGCGTGGGGAGCAAACAGGATTAGAT	#N/A	#N/A	#N/A	#N/A	#N/A	#N/A	#N/A
129	4	0	0	Pseudomonas sp. J380 chromosome, complete genome	GTGTGAGAAGGTCTTCGGATTGTAAAGCACTTTAAGTTGGGAGGAAGGGTTGTAGATTAATACTCTGCAATTTTGACGTTACCGACAGAATAAGCACCGGCTAACTCTGTGCCAGCAGCCGCGGTAATACAGAGGGTGCAAGCGTTAATCGGAATTACTGGGCGTAAAGCGCGCGTAGGTGGTTTGTTAAGTTGGATGTGAAATCCCCGGGCTCAACCTGGGAACTGCATTCAAAACTGACTGACTAGAGTATGGTAGAGGGTGGTGGAATTTCCTGTGTAGCGGTGAAATGCGTAGATATAGGAAGGAACACCAGTGGCGAAGGCGACCACCTGGACTAATACTGACACTGAGGTGCGAAAGCGTGGGGAGCAAACAGGATTAGATAC	GTCCAGGTGGTCGCCTTCGCCACTGGTGTTCCTTCCTATATCTACGCATTTCACCGCTACACAGGAAATTCCACCACCCTCTACCATACTCTAGTCAGTCAGTTTTGAATGCAGTTCCCAGGTTGAGCCCGGGGATTTCACATCCAACTTAACAAACCACCTACGCGCGCTTTACGCCCAGTAATTCCGATTAACGCTTGCACCCTCTGTATTACCGCGGCTGCTGGCACAGAGTTAGCCGGTGCTTATTCTGTCGGTAACGTCAAAATTGCAGAGTATTAATCTACAACCCTTCCTCCCAACTTAAAGTGCTTTACAATCCGAAGACCTTCTTCACACACGCGGCATGGCTGGATCAGGCTTTCGCCCATTGTCCAATATTCCCCACTGCTC	TCCGGTGGTTTGCACGGTGTAGGCGTGTCGGTAGTGAACGCTCTGTCCGAAGAACTGATCCTCACTGTCCGCCGTAGCGGCAAGATTTGGGAGCAGACCTACGTCCACGGCGTACCACAGGAACCGATGAAAATCGTCGGTGATAGTGAAACCACCGGTACCCAGATCCACTTCAAGCCATCGGAAGAAACCTTCAAGAACATCCACTTCAGCTGGGACATCCTGGCCAAGCGGATTCGCGAACTGTCCTTCCTTAACTCCGGTGTCGGCATCGTCCTCAAGGATGAGCGCAGCGGCAAGGAAGAGCTGTTCAAGTACGAGGGTGGCCTGCGAGCGTTCGTTGAATACCTGAACACCAACAAGACCGCGGTCAACCAGGTGTTCCACTTCAACATTCAG…	GGTACGCAGCTTGTCGATGTTGTACTCATCGCGGCCAATACCGCAGCCCAATGCCGTGATCAAGGTGCCGACTTCCTGGGAAGAAATCATCTTGTCAAAGCGGGCCTTCTCAACGTTGAGGATCTTGCCCTTCAACGGCAGGATGGCCTGGGTGCGACGGTTACGACCCTGCTTGGCGGAACCGCCTGCAGAGTCACCTTCCACCAGATACAGTTCGGAGAGGGCAGGGTCTTTCTCTTGGCAGTCAGCCAGTTTGCCTGGCAGCCCGGCGATATCCAGCGCACCTTTACGGCGGGTCATCTCACGGGCCTTACGCGCGGCTTCACGAGCGCGGGCAGCATCGATCATCTTGCCGACGACCAGCTTGGCTTCGTTCGGGTTTTCCAACAGGAAGTCGGA…	#N/A	#N/A	#N/A	#N/A
130	0	0	0	Bacillus cereus strain YEBBR5 16S ribosomal RNA gene, partial sequence	GTGATGAAGGCTTTCGGGTCGTAAAACTCTGTTGTTAGGGAAGAACAAGTGCTAGTTGAATAAGCTGGCACCTTGACGGTACCTAACCAGAAAGCCACGGCTAACTACGTGCCAGCAGCCGCGGTAATACGTAGGTGGCAAGCGTTATCCGGAATTATTGGGCGTAAAGCGCGCGCAGGTGGTTTCTTAAGTCTGATGTGAAAGCCCACGGCTCAACCGTGGAGGGTCATTGGAAACTGGGAGACTTGAGTGCAGAAGAGGAAAGTGGAATTCCATGTGTAGCGGTGAAATGCGTAGAGATATGGAGGAACACCAGTGGCGAAGGCGACTTTCTGGTCTGTAACTGACACTGAGGCGCGAAAGCGTGGGGAGCAAACAGGATTAGATACCCNAAGTAG	#N/A	#N/A	#N/A	#N/A	#N/A	#N/A	#N/A
131	0	4	0	Pseudomonas sp. DTU12.3 chromosome, complete genome	TCTGACGGAGCACGCCGCGTGAGTGATGAAGGCTTTCGGGTCGTAAAACTCTGTTGTTAGGGAAGAACAAGTGCTAGTTGAATAAGCTGGCACCTTGACGGTACCTAACCAGAAAGCCACGGCTAACTACGTGCCAGCAGCCGCGGTAATACGTAGGTGGCAAGCGTTATCCGGAATTATTGGGCGTAAAGCGCGCGCAGGTGGTTTCTTAAGTCTGATGTGAAAGCCCACGGCTCAACCGTGGAGGGTCATTGGAAACTGGGAGACTTGAGTGCAGAAGAGGAAAGTGGAATTCCATGTGTAGCGGTGAAATGCGTAGAGATATGGAGGAACACCAGTGGCGAAGGCGACTTTCTGGTCTGTAACTGACACTGAGGCGCGAAAGCGTGGGGAGCAAAC…	GTCAGTTACAGACCAGAAAGTCGCCTTCGCCACTGGTGTTCCTCCATATCTCTACGCATTTCACCGCTACACATGGAATTCCACTTTCCTCTTCTGCACTCAAGTCTCCCAGTTTCCAATGACCCTCCACGGTTGAGCCGTGGGCTTTCACATCAGACTTAAGAAACCACCTGCGCGCGCTTTACGCCCAATAATTCCGGATAACGCTTGCCACCTACGTATTACCGCGGCTGCTGGCACGTAGTTAGCCGTGGCTTTCTGGTTAGGTACCGTCAAGGTGCCAGCTTATTCAACTAGCACTTGTTCTTCCCTAACAACAGAGTTTTACGACCCGAAAGCCTTCATCACTCACGCGGCGTTGCTCCGTCAGACTTTCGTCCATTGCGGAAGATTCCCTAC…	ACAAGTATCCGGCGGTCTGCACGGTGTAGGTGTTTCGGTAGTGAACGCGCTGTCCGAAGAACTGGTTCTGACCGTTCGCCGCAGCGGCAAGATCTGGGAACAGACCTACGTCCACGGCGTGCCTCAGGCACCGATGGCCATCGTTGGCGACAGCGAAACCACCGGCACCCAGATTCACTTCAAGCCGTCGGCTGACACCTTCAAGAATATCCACTTCAGCTGGGACATCCTGGCCAAGCGTATTCGTGAGCTGTCCTTCCTCAACTCCGGTGTCGGCATCGTCCTCAAGGATGAGCGCAGCGGCAAAGAAGAGCTGTTCAAGTACGAAGGCGGCCTGCGTGCGTTCGTTGAGTACCTGAACACCAACAAGACTGCGGTCAACCAGGTGTTCCACTTCAA…	AACGCAGCTTGTCGATGTTGTACTCGTCACRACCGATGCCGCAGCCCAGTGCGGTGATCAAGGTGCCCACTTCCTGGGAAGAGATCATCTTGTCGAAACGGGCTTTCTCGACGTTGAGGATCTTGCCCTTCAACGGCAGGATCGCCTGGGTCTTGCGGTTACGCCCCTGCTTGGCAGAGCCGCCCGCGGAGTCACCTTCCACGAGGTACAGTTCGGAAAGCGCAGGGTCTTTTTCCTGGCAGTCAGCGAGCTTGCCTGGCAGACCGGCGATGTCCAGCGCGCCTTTGCGGCGGGTCATCTCACGGGCTTTACGCGCCGCTTCACGGGCACGCGCAGCGTCRATCATCTTGCCGACGACCAGCTTGGCTTCGTTCGGGTTTTCCAAGAGGAAGTCGGAGA…	#N/A	#N/A	#N/A	#N/A
132	0	0	0	Kluyvera ascorbata strain 2521 16S ribosomal RNA gene, partial sequence	TGCCGCGTGTATGAAGAAGGCCTTCGGGTTGTAAAGTACTTTCAGCGAGGAGGAAGGCATTAAGGTTAATAACCTTAGTGATTGACGTTACTCGCAGAAGAAGCACCGGCTAACTCCGTGCCAGCAGCCGCGGTAATACGGAGGGTGCAAGCGTTAATCGGAATTACTGGGCGTAAAGCGCACGCAGGCGGTCTGTCAAGTCGGATGTGAAATCCCCGGGCTCAACCTGGGAACTGCATTCGAAACTGGCAGGCTAGAGTCTTGTAGAGGGGGGTAGAATTCCAGGTGTAGCGGTGAAATGCGTAGAGATCTGGAGGAATACCGGTGGCGAAGGCGGCCCCCTGGACAAAGACTGACGCTCAGGTGCGAAAGCGTGGGGAGCAAACAGGATTANATACCA	#N/A	#N/A	#N/A	#N/A	#N/A	#N/A	#N/A
133	0	0	0	Bacillus cereus strain SERA2 16S ribosomal RNA gene, partial sequence	CACGCCGCGTGAGTGATGAAGGCTTTCGGGTCGTAAAACTCTGTTGTTAGGGAAGAACAAGTGCTAGTTGAATAAGCTGGCACCTTGACGGTACCTAACCAGAAAGCCACGGCTAACTACGTGCCAGCAGCCGCGGTAATACGTAGGTGGCAAGCGTTATCCGGAATTATTGGGCGTAAAGCGCGCGCAGGTGGTTTCTTAAGTCTGATGTGAAAGCCCACGGCTCAACCGTGGAGGGTCATTGGAAACTGGGAGACTTGAGTGCAGAAGAGGAAAGTGGAATTCCATGTGTAGCGGTGAAATGCGTAGAGATATGGAGGAACACCAGTGGCGAAGGCGACTTTCTGGTCTGTAACTGACACTGAGGCGCGAAAGCGTGGGGAGCAAACAGGATTAGAT…	#N/A	#N/A	#N/A	#N/A	#N/A	#N/A	#N/A
134	0	0	0	Bacillus sp. (in: Bacteria) strain ESA 657 16S ribosomal RNA gene, partial sequence	GCACGCCGCGTGAGTGATGAAGGCTTTCGGGTCGTAAAACTCTGTTGTTAGGGAAGAACAAGTGCTAGTTGAATAAGCTGGCACCTTGACGGTACCTAACCAGAAAGCCACGGCTAACTACGTGCCAGCAGCCGCGGTAATACGTAGGTGGCAAGCGTTATCCGGAATTATTGGGCGTAAAGCGCGCGCAGGTGGTTTCTTAAGTCTGATGTGAAAGCCCACGGCTCAACCGTGGAGGGTCATTGGAAACTGGGAGACTTGAGTGCAGAAGAGGAAAGTGGAATTCCATGTGTAGCGGTGAAATGCGTAGAGATATGGAGGAACACCAGTGGCGAAGGCGACTTTCTGGTCTGTAACTGACACTGAGGCGCGAAAGCGTGGGGAGCAAACAGGATTAGA…	#N/A	#N/A	#N/A	#N/A	#N/A	#N/A	#N/A
135	0	0	0	Uncultured Pseudomonas sp. clone 93 16S ribosomal RNA gene, partial sequence	GGGAGGAAGGGTTGTANATTAATACTCTGCNATTTTGACNTTACCNACANAATAANCNCCGGCTAACTCTGTGCCNNCNGCCNCGGTAATACNGAGGGTGCAAGCGTTAATCNGAATTACTGGGCGTAAAGCGCGCGTANGTGGTTTGTTAANTTGGATGTGAAATCCCCGGGCTCNACCTGGGAACTGCATTCNAAACTGACTGACTANAGTATGGTANANGGNGGTGGAATTTCCTGTGTAGCGGTGAAATGCGTANATATAGGAAGGAACACCAGTGGCGAAGGCGACCACCTGGACTANTACTGACACTGAGGTGCGAAAGCGTGGGGAGCAAACAGGATTAGATACCCCA	#N/A	#N/A	#N/A	#N/A	#N/A	#N/A	#N/A
136	0	0	0	0	#N/A	#N/A	#N/A	#N/A	#N/A	#N/A	#N/A	#N/A
137	0	0	0	Pseudomonas sp. strain 2180 16S ribosomal RNA gene, partial sequence	TGCCGCGTGTGTGAAGAAGGTCTTCGGATTGTAAAGCACTTTAAGTTGGGAGGAAGGGCAGTAAGCGAATACCTTGCTGTTTTGACGTTACCGACAGAATAAGCACCGGCTAACTCTGTGCCAGCAGCCGCGGTAATACAGAGGGTGCAAGCGTTAATCGGAATTACTGGGCGTAAAGCGCGCGTAGGTGGTTTGTTAAGTTGAATGTGAAATCCCCGGGCTCAACCTGGGAACTGCATCCAAAACTGGCAAGCTAGAGTAGGGCAGAGGGTGGTGGAATTTCCTGTGTAGCGGTGAAATGCGTAGATATAGGAAGGAACACCAGTGGCGAAGGCGACCACCTGGGCTCATACTGACACTGAGGTGCGAAAGCGTGGGGAGCAAACAGGATTANATACC…	#N/A	#N/A	#N/A	#N/A	#N/A	#N/A	#N/A
138	0	1	0	Pseudomonas sp. strain 2-27 16S ribosomal RNA gene, partial sequence	TGTAAAGCNCTTTNNNTTGGGAGGAAGGGCAGTAAATTAATACTTTGCTGTTTTGACNTTACCGACAGAATAAGCNCCGGCTAACTCTGTGCCNGCAGCCGCGGTAATACAGAGGGTGCAAGCGTTAATCGGAATTACTGGGCGTAAAGCGCGCGTAGGTGGTTCGTTNAGTTGGATGTGAAATCCCCGGGCTCAACCTGGGAACTGCATTCAAAACTGNCGAGCTANAGTANGGTANANGGTGGTGGAATTTCCTGTGTAGCGGTGAAATGCGTAGATATNGGAAGGAACACCAGTGGCGAAGGCGACCACCTGGACTGATACTGACACTGAGGTGCGAAAGCGTGGGGAGCAAACAGGATTAGATACC	#N/A	#N/A	#N/A	#N/A	#N/A	#N/A	#N/A
139	0	0	0	Pseudomonas sp. strain 2180 16S ribosomal RNA gene, partial sequence	TGCCGCGTGTGTGAAGAAGGTCTTCGGATTGTAAAGCACTTTAAGTTGGGAGGAAGGGCAGTAAATTAATACTTTGCTGTTTTGACGTTACCGACAGAATAAGCACCGGCTAACTCTGTGCCAGCAGCCGCGGTAATACAGAGGGTGCAAGCGTTAATCGGAATTACTGGGCGTAAAGCGCGCGTAGGTGGTTCGTTAAGTTGGATGTGAAATCCCCGGGCTCAACCTGGGAACTGCATTCAAAACTGTCGAGCTAGAGTATGGTAGAGGGTGGTGGAATTTCCTGTGTAGCGGTGAAATGCGTAGATATAGGAAGGAACACCAGTGGCGAAGGCGACCACCTGGACTGATACTGACACTGAGGTGCGAAAGCGTGGGGAGCAAACAGGATTANATACC…	#N/A	#N/A	#N/A	#N/A	#N/A	#N/A	#N/A
140	1	0	0	Pseudomonas sp. strain 2180 16S ribosomal RNA gene, partial sequence	TGCCGCGTGTGTGAAGAAGGTCTTCGGATTGTAAAGCACTTTAAGTTGGGAGGAAGGGCAGTAAGCGAATACCTTGCTGTTTTGACGTTACCGACAGAATAAGCACCGGCTAACTCTGTGCCAGCAGCCGCGGTAATACAGAGGGTGCAAGCGTTAATCGGAATTACTGGGCGTAAAGCGCGCGTAGGTGGTTTGTTAAGTTGAATGTGAAATCCCCGGGCTCAACCTGGGAACTGCATCCAAAACTGGCAAGCTAGAGTAGGGCAGAGGGTGGTGGAATTTCCTGTGTAGCGGTGAAATGCGTAGATATAGGAAGGAACACCAGTGGCGAAGGCGACCACCTGGGCTCATACTGACACTGAGGTGCGAAAGCGTGGGGAGCAAACAGGATTANATAC	#N/A	#N/A	#N/A	#N/A	#N/A	#N/A	#N/A
141	0	0	0	0	#N/A	#N/A	#N/A	#N/A	#N/A	#N/A	#N/A	#N/A
142	1	0	0	0	#N/A	#N/A	#N/A	#N/A	#N/A	#N/A	#N/A	#N/A
143	1	0	0	0	#N/A	#N/A	#N/A	#N/A	#N/A	#N/A	#N/A	#N/A
144	1	2	0	0	#N/A	#N/A	#N/A	#N/A	#N/A	#N/A	#N/A	#N/A
145	0	0	0	0	#N/A	#N/A	#N/A	#N/A	#N/A	#N/A	#N/A	#N/A
146	0	1	0	0	#N/A	#N/A	#N/A	#N/A	#N/A	#N/A	#N/A	#N/A
147	0	0	0	0	#N/A	#N/A	#N/A	#N/A	#N/A	#N/A	#N/A	#N/A
148	0	0	0	Pseudomonas umsongensis strain SeaQual_P_81/6 16S ribosomal RNA gene, partial sequence	#N/A	AGGNGGTCGCCTTCGCCACNGGTGTTCCTTCCTATMTCTACGCATTTCACCGCTACACMNGAAATTCCACCMCCCTCTACCATACTCTAGCNNGNCAGTTTTGAATGCAGTTCCCAGGTTGAGCCCGGGGATTTCACATCNNACTTAACAAACCRCCTRCGNGCGCTTTACGCCCAGTAATTCCGATTAACGCTTGCACCCTCYGTATTACCGCGGCTGCTGGCACRGAGTTAGCCGGTGCTTMTTCTGTCGGTAACGTCAAANCANNAANGTATTAANNNACTGCCCTTCCTCCCAACTTAAAGTGCTTTACAAYCCGAAGACCTTCTTCANACACGCGGCATGGCTGNATCAGGCTTNCGCCCATTGTNCAATATTCCCCACTGCTG	#N/A	#N/A	#N/A	#N/A	#N/A	#N/A
149	0	0	0	0	#N/A	#N/A	#N/A	#N/A	#N/A	#N/A	#N/A	#N/A
150	0	0	0	Pantoea agglomerans strain cqsM7 16S ribosomal RNA gene, partial sequence	#N/A	CGTCAGTCTTTGTCCAGGGGGCCGCCTTCGCCACCGGTATTCCTCCAGATCTCTACGCATTTCACCGCTACACCTGGAATTCTACCCCCCTCTACAAGACTCAAGCCTGCCAGTTTCAAATGCAGTTCCCAGGTTAAGCCCGGGGATTTCACATCTGACTTAACAGACCGCCTGCGTGCGCTTTACGCCCAGTAATTCCGATTAACGCTTGCACCCTCCGTATTACCGCGGCTGCTGGCACGGAGTTAGCCGGTGCTTCTTCTGCGGGTAACGTCAATCGACGCGGTTATTAACCNCNTCGCCTTCCTCCCCGCTGAAAGTACTTTACAACCCGAAGGCCTTCTTCATACACGCGGCATGGCTGCATCAGGCTTGCGCCCATTGTGCAATATTCCCCAC…	#N/A	#N/A	#N/A	#N/A	#N/A	#N/A
151	0	0	0	0	#N/A	#N/A	#N/A	#N/A	#N/A	#N/A	#N/A	#N/A
152	0	0	0	Pseudomonas gessardii strain SeaQual_P_B791/1 16S ribosomal RNA gene, partial sequence	#N/A	GTATCAGTCCAGGTGGTCGCCTTCGCCACTGGTGTTCCTTCCTATATCTACGCATTTCACCGCTACACAGGAAATTCCACCACCCTCTACCATACTCTAGTCAGTCAGTTTTGAATGCAGTTCCCAGGTTGAGCCCGGGGATTTCACATCCAACTTAACTAACCACCTACGCGCGCTTTACGCCCAGTAATTCCGATTAACGCTTGCACCCTCTGTATTACCGCGGCTGCTGGCACAGAGTTAGCCGGTGCTTATTCTGTCGGTAACGTCAAAATTGCAGAGTATTAATCTACAACCCTTCCTCCCAACTTAAAGTGCTTTACAATCCGAAGACCTTCTTCACACACGCGGCATGGCTGGATCAGGCTTTCGCCCATTGTCCAATATTCCCCACTGCTG…	#N/A	#N/A	#N/A	#N/A	#N/A	#N/A
153	0	0	0	Pseudomonas sp. strain 2180 16S ribosomal RNA gene, partial sequence	#N/A	GTCAGTATGAGCCCAGGTGGTCGCCTTCGCCACTGGTGTTCCTTCCTATATCTACGCATTTCACCGCTACACAGGAAATTCCACCACCCTCTGCCCTACTCTAGCTTGCCAGTTTTGGATGCAGTTCCCAGGTTGAGCCCGGGGATTTCACATTCAACTTAACAAACCACCTACGCGCGCTTTACGCCCAGTAATTCCGATTAACGCTTGCACCCTCTGTATTACCGCGGCTGCTGGCACAGAGTTAGCCGGTGCTTATTCTGTCGGTAACGTCAAAACAGCAAGGTATTCGCTTACTGCCCTTCCTCCCAACTTAAAGTGCTTTACAATCCGAAGACCTTCTTCACACACGCGGCATGGCTGGATCAGGCTTTCGCCCATTGTCCAATATTCCCCACT…	#N/A	#N/A	#N/A	#N/A	#N/A	#N/A
154	0	0	0	Pantoea agglomerans strain cqsM7 16S ribosomal RNA gene, partial sequence	#N/A	GTCTTTGTCCAGGGGGCCGCCTTCGCCACCGGTRTTCCTCCAGATCTCTACGCATTTCACCGCTACACCTGNAATTCTACCCCCCTCTACAAGACTCAAGCCTGCCAGTTTCAAATGCAGTTCCCAGGTTAAGCCCGGGGATTTCACATCTGACTTAACANACCGCCTGCGTGCGCTTTACGCCCAGTAATTCCGATTAACGCTTGCACCCTCCGTATTACCGCGGCTGCTGGCACGGAGTTAGCCGGTGCTTCTTCTGCGGGTAACGTCAATCGANGCGNTTATTAACCNCATCGCCTTCCTCCCCGCTGAAAGTACTTTACAACCCGAAGGCCTTCTTCATACACGCGGCATGGCTGCATCAGGCTTGCGCCCATTGTGCAATATTCCCCACTGCTG…	#N/A	#N/A	#N/A	#N/A	#N/A	#N/A
155	2	1	0	0	#N/A	#N/A	#N/A	#N/A	#N/A	#N/A	#N/A	#N/A
156	0	0	0	Pseudomonas sp. strain 2180 16S ribosomal RNA gene, partial sequence	#N/A	GTCAGTATGAGCCCAGGTGGTCGCCTTCGCCACTGGTGTTCCTTCCTATATCTACGCATTTCACCGCTACACAGGAAATTCCACCACCCTCTGCCCTACTCTAGCTTGCCAGTTTTGGATGCAGTTCCCAGGTTGAGCCCGGGGATTTCACATTCAACTTAACAAACCACCTACGCGCGCTTTACGCCCAGTAATTCCGATTAACGCTTGCACCCTCTGTATTACCGCGGCTGCTGGCACAGAGTTAGCCGGTGCTTATTCTGTCGGTAACGTCAAAACAGCAAGGTATTCGCTTACTGCCCTTCCTCCCAACTTAAAGTGCTTTACAATCCGAAGACCTTCTTCACACACGCGGCATGGCTGGATCAGGCTTTCGCCCATTGTCCAATATTCCCCACT…	#N/A	#N/A	#N/A	#N/A	#N/A	#N/A
157	0	0	0	0	#N/A	#N/A	#N/A	#N/A	#N/A	#N/A	#N/A	#N/A
158	0	0	0	0	#N/A	#N/A	#N/A	#N/A	#N/A	#N/A	#N/A	#N/A
159	0	0	0	Pseudomonas gessardii strain ESR9 16S ribosomal RNA gene, partial sequence	#N/A	GTCAGTATTAGTCCAGGTGGTCGCCTTCGCCACTGGTGTTCCTTCCTATATCTACGCATTTCACCGCTACACAGGAAATTCCACCACCCTCTACCATACTCTAGTCAGTCAGTTTTGAATGCAGTTCCCAGGTTGAGCCCGGGGATTTCACATCCAACTTAACAAACCACCTACGCGCGCTTTACGCCCAGTAATTCCGATTAACGCTTGCACCCTCTGTATTACCGCGGCTGCTGGCACAGAGTTAGCCGGTGCTTATTCTGTCGGTAACGTCAAAATTGCAGAGTATTAATCTACAACCCTTCCTCCCAACTTAAAGTGCTTTACAATCCGAAGACCTTCTTCACACACGCGGCATGGCTGGATCAGGCTTTCGCCCATTGTCCAATATTCCCCACT…	#N/A	#N/A	#N/A	#N/A	#N/A	#N/A
160	1	1	0	0	#N/A	#N/A	#N/A	#N/A	#N/A	#N/A	#N/A	#N/A
161	2	2	0	Pseudomonas sp. HN8-3 chromosome, complete genome	#N/A	GTCAGTATNAGTCCAGGTGGTCGCCTTCGCCACTGGTGTTCCTTCCTATATCTACGCATTTCACCGCTACACAGGAAATTCCACCACCCTCTACCATACTCTAGTCAGTCAGTTTTGAATGCAGTTCCCAGGTTGAGCCCGGGGATTTCACATCCAACTTAACAAACCACCTACGCGCGCTTTACGCCCAGTAATTCCGATTAACGCTTGCACCCTCTGTATTACCGCGGCTGCTGGCACAGAGTTAGCCGGTGCTTATTCTGTCGGTAACGTCAAAATTGCAGAGTATTAATCTACAACCCTTCCTCCCAACTTAAAGTGCTTTACAATCCGAAGACCTTCTTCACACACGCGGCATGGCTGGATCAGGCTTTCGCCCATTGTCCAATATTCCCCACT…	#N/A	#N/A	#N/A	#N/A	#N/A	#N/A
162	2	2	0	Pseudomonas sp. HN8-3 chromosome, complete genome	#N/A	GTGTCAGTATNAGTCCAGGTGGTCGCCTTCGCCACTGGTGTTCCTTCCTATATCTACGCATTTCACCGCTACACAGGAAATTCCACCACCCTCTACCATACTCTAGTCAGTCAGTTTTGAATGCAGTTCCCAGGTTGAGCCCGGGGATTTCACATCCAACTTAACAAACCACCTACGCGCGCTTTACGCCCAGTAATTCCGATTAACGCTTGCACCCTCTGTATTACCGCGGCTGCTGGCACAGAGTTAGCCGGTGCTTATTCTGTCGGTAACGTCAAAATTGCAGAGTATTAATCTACAACCCTTCCTCCCAACTTAAAGTGCTTTACAATCCGAAGACCTTCTTCACACACGCGGCATGGCTGGATCAGGCTTTCGCCCATTGTCCAATATTCCCCA…	#N/A	#N/A	#N/A	#N/A	#N/A	#N/A
163	3	2	0	Pseudomonas synxantha strain NCTC10696 genome assembly, chromosome: 1	CTTCGGATTGTAAAGCACTTTAAGTTGGGAGGAAGGGTTGTAGATTAATACTCTGCAATTTTGACGTTACCGACAGAATAAGCACCGGCTAACTCTGTGCCAGCAGCCGCGGTAATACAGAGGGTGCAAGCGTTAATCGGAATTACTGGGCGTAAAGCGCGCGTAGGTGGTTTGTTAAGTTGGATGTGAAATCCCCGGGCTCAACCTGGGAACTGCATTCAAAACTGACTGACTAGAGTATGGTAGAGGGTGGTGGAATTTCCTGTGTAGCGGTGAAATGCGTAGATATAGGAAGGAACACCAGTGGCGAAGGCGACCACCTGGACTGATACTGACACTGAGGTGCGAAAGCGTGGGGAGCAAACAGGATTAGATACACA	GTCCAGGTGGTCGCCTTCGCCACTGGTGTTCCTTCCTATATCTACGCATTTCACCGCTACACAGGAAATTCCACCACCCTCTACCATACTCTAGTCAGTCAGTTTTGAATGCAGTTCCCAGGTTGAGCCCGGGGATTTCACATCCAACTTAACAAACCACCTACGCGCGCTTTACGCCCAGTAATTCCGATTAACGCTTGCACCCTCTGTATTACCGCGGCTGCTGGCACAGAGTTAGCCGGTGCTTATTCTGTCGGTAACGTCAAAATTGCAGAGTATTAATCTACAACCCTTCCTCCCAACTTAAAGTGCTTTACAATCCGAAGACCTTCTTCACACACGCGGCATGGCTGGATCAGGCTTTCGCCCATTGTCCAATATTCCCCACTGCTC	CCGGTGGTTTGCACGGTGTAGGTGTGTCGGTAGTGAACGCGCTGTCCGAAGAGTTGATTCTCACCGTTCGCCGCAGCGGCAAGATCTGGGAACAGACCTATGTCCACGGTGTGCCACAGGAGCCGATGAAAATCGTTGGCGACAGTGAAACCACGGGCACCCAGATCCACTTCAAGCCATCGGCTGAAACCTTCAAGAACATCCACTTCAGCTGGGACATCCTGGCCAAGCGGATTCGTGAACTGTCCTTCCTCAACTCCGGTGTCGGTATCGTCCTCAAGGATGAACGCAGCGGCAAGGAAGAACTGTTCAAGTACGAAGGCGGCCTGCGTGCATTCGTTGAATACCTGAACACCAACAAGACTGCGGTCAACCAGGTGTTCCACTTCAACATCCAGC…	AGCGCAGCTTGTCGATGTTGTACTCGTCACGGCCAATACCGCAGCCCAGCGCTGTGATCAAGGTGCCGACTTCCTGGGAGGAAATCATCTTGTCGAAACGAGCCTTCTCGACGTTGAGGATCTTACCCTTCAACGGCAGGATGGCCTGGGTGCGACGGTTGCGACCCTGCTTGGCGGAACCGCCAGCAGAGTCACCTTCCACCAGGTACAGTTCGGAGAGGGCAGGGTCCTTCTCCTGGCAGTCAGCCAGTTTGCCTGGCAAGCCGGCGATATCCAACGCGCCTTTACGACGGGTCATCTCACGGGCTTTACGTGCGGCTTCACGGGCACGGGCAGCATCGATCATCTTGCCAACGACCAGCTTGGCTTCGTTCGGGTTTTCCAACAGGAAGTCGGAGA…	#N/A	#N/A	#N/A	#N/A
164	3	1	0	Pseudomonas synxantha strain PLA-28 16S ribosomal RNA gene, partial sequence	#N/A	AGTATNAGTCCAGGTGGTCGCCTTCGCCACTGGTGTTCCTTCCTATATCTACGCATTTCACCGCTACACAGGAAATTCCACCACCCTCTACCATACTCTAGTCAGTCAGTTTTGAATGCAGTTCCCAGGTTGAGCCCGGGGATTTCACATCCAACTTAACAAACCACCTACGCGCGCTTTACGCCCAGTAATTCCGATTAACGCTTGCACCCTCTGTATTACCGCGGCTGCTGGCACAGAGTTAGCCGGTGCTTATTCTGTCGGTAACGTCAAAATTGCAGAGTATTAATCTACAACCCTTCCTCCCAACTTAAAGTGCTTTACAATCCGAAGACCTTCTTCACACACGCGGCATGGCTGGATCAGGCTTTCGCCCATTGTCCAATATTCCCCACTGCT…	#N/A	#N/A	#N/A	#N/A	#N/A	#N/A
165	0	0	0	Bacillus cereus strain yasmun80b 16S ribosomal RNA gene, partial sequence	#N/A	GTCAGTTACAGACCAGAAAGTCGCCTTCGCCACTGGTGTTCCTCCATATCTCTACGCATTTCACCGCTACACATGGAATTCCACTTTCCTCTTCTGCACTCAAGTCTCCCAGTTTCCAATGACCCTCCACGGTTGAGCCGTGGGCTTTCACATCAGACTTAAGAAACCACCTGCGCGCGCTTTACGCCCAATAATTCCGGATAACGCTTGCCACCTACGTATTACCGCGGCTGCTGGCACGTAGTTAGCCGTGGCTTTCTGGTTAGGTACCGTCAAGGTGCCAGCTTATTCAACTAGCACTTGTTCTTCCCTAACAACAGAGTTTTACGACCCGAAAGCCTTCATCACTCACGCGGCGTTGCTCCGTCAGACTTTCGTCCATTGCGGAAGATTCCCTAC…	#N/A	#N/A	#N/A	#N/A	#N/A	#N/A
166	0	0	0	Bacillus cereus strain yasmun80b 16S ribosomal RNA gene, partial sequence	#N/A	GTCAGTTACAGACCAGAAAGTCGCCTTCGCCACTGGTGTTCCTCCATATCTCTACGCATTTCACCGCTACACATGGAATTCCACTTTCCTCTTCTGCACTCAAGTCTCCCAGTTTCCAATGACCCTCCACGGTTGAGCCGTGGGCTTTCACATCAGACTTAAGAAACCACCTGCGCGCGCTTTACGCCCAATAATTCCGGATAACGCTTGCCACCTACGTATTACCGCGGCTGCTGGCACGTAGTTAGCCGTGGCTTTCTGGTTAGGTACCGTCAAGGTGCCAGCTTATTCAACTAGCACTTGTTCTTCCCTAACAACAGAGTTTTACGACCCGAAAGCCTTCATCACTCACGCGGCGTTGCTCCGTCAGACTTTCGTCCATTGCGGAAGATTCCCTAC…	#N/A	#N/A	#N/A	#N/A	#N/A	#N/A
167	0	0	0	Bacillus cereus strain yasmun80b 16S ribosomal RNA gene, partial sequence	#N/A	AGTTACAGACCAGAAAGTCGCCTTCGCCACTGGTGTTCCTCCATATCTCTACGCATTTCACCGCTACACATGGAATTCCACTTTCCTCTTCTGCACTCAAGTCTCCCAGTTTCCAATGACCCTCCACGGTTGAGCCGTGGGCTTTCACATCAGACTTAAGAAACCACCTGCGCGCGCTTTACGCCCAATAATTCCGGATAACGCTTGCCACCTACGTATTACCGCGGCTGCTGGCACGTAGTTAGCCGTGGCTTTCTGGTTAGGTACCGTCAAGGTGCCAGCTTATTCAACTAGCACTTGTTCTTCCCTAACAACAGAGTTTTACGACCCGAAAGCCTTCATCACTCACGCGGCGTTGCTCCGTCAGACTTTCGTCCATTGCGGAAGATTCCCTACTGC…	#N/A	#N/A	#N/A	#N/A	#N/A	#N/A
168	0	0	0	Bacillus cereus strain yasmun80b 16S ribosomal RNA gene, partial sequence	#N/A	AGTTACAGACCAGAAAGTCGCCTTCGCCACTGGTGTTCCTCCATATCTCTACGCATTTCACCGCTACACATGGAATTCCACTTTCCTCTTCTGCACTCAAGTCTCCCAGTTTCCAATGACCCTCCACGGTTGAGCCGTGGGCTTTCACATCAGACTTAAGAAACCACCTGCGCGCGCTTTACGCCCAATAATTCCGGATAACGCTTGCCACCTACGTATTACCGCGGCTGCTGGCACGTAGTTAGCCGTGGCTTTCTGGTTAGGTACCGTCAAGGTGCCAGCTTATTCAACTAGCACTTGTTCTTCCCTAACAACAGAGTTTTACGACCCGAAAGCCTTCATCACTCACGCGGCGTTGCTCCGTCAGACTTTCGTCCATTGCGGAAGATTCCCTACTGC…	#N/A	#N/A	#N/A	#N/A	#N/A	#N/A
169	2	0	0	0	#N/A	#N/A	#N/A	#N/A	#N/A	#N/A	#N/A	#N/A
170	0	0	0	Bacillus cereus strain yasmun80b 16S ribosomal RNA gene, partial sequence	#N/A	AGTTACAGACCAGAAAGTCGCCTTCGCCACTGGTGTTCCTCCATATCTCTACGCATTTCACCGCTACACATGGAATTCCACTTTCCTCTTCTGCACTCAAGTCTCCCAGTTTCCAATGACCCTCCACGGTTGAGCCGTGGGCTTTCACATCAGACTTAAGAAACCACCTGCGCGCGCTTTACGCCCAATAATTCCGGATAACGCTTGCCACCTACGTATTACCGCGGCTGCTGGCACGTAGTTAGCCGTGGCTTTCTGGTTAGGTACCGTCAAGGTGCCAGCTTATTCAACTAGCACTTGTTCTTCCCTAACAACAGAGTTTTACGACCCGAAAGCCTTCATCACTCACGCGGCGTTGCTCCGTCAGACTTTCGTCCATTGCGGAAGATTCCCTACTGC…	#N/A	#N/A	#N/A	#N/A	#N/A	#N/A
171	3	3	0	0	#N/A	#N/A	#N/A	#N/A	#N/A	#N/A	#N/A	#N/A
172	2	0	0	0	#N/A	#N/A	#N/A	#N/A	#N/A	#N/A	#N/A	#N/A
173	0	0	0	Sodalis sp. strain Bb-Pol-5 16S ribosomal RNA gene, partial sequence	NCCATGCCGCGTGTGTGAAGAAGGCCTTCGGGTTGTAAAGCACTTTCAGCGGGGAGGAAGGCAAYAAGGTTAATAACCTTGTTGATTGACGTTACCCGCAGAAGAAGCACCGGCTAACTCCGTGCCAGCAGCCGCGGTAATACGGAGGGTGCGAGCGTTAATCGGAATTACTGGGCGTAAAGCGTACGCAGGCGGTTTGTTAAGTCAGATGTGAAATCCCCGAGCTTAACTCGGGAACTGCATTTGAAACTGGCAAGCTAGAGTCTCGTAGAGGGGGGTAGAATTCCAGGTGTAGCGGTGAAATGCGTAGAGATCTGGAGGAATACCGGTGGCGAAGGCGGCCCCCTGGACGAAGACTGACGCTCAGGTACGAAAGCGTGGGGAGCAAACAGGATTAGA…	#N/A	#N/A	#N/A	#N/A	#N/A	#N/A	#N/A
174	3	3	0	0	#N/A	CGNATTTCACCGCTACACNNGGAATTCCNANNNCCYCTACCGNACTCTAGCNTGCCMGTATCGAATGCNGANCCGGGGTTGAGCCCCGGGCTTTCACNTCCGACTNNACAAGCCGCCTACGAGCNCTTTACGCCCANTAATTCCGAACAACGCTNGCMCCCTNCGTATTACCGCGGCTGCTGGCACGNAGTTAGCCGGNGCTTNTTCTGCNGGTACCGTCA	#N/A	#N/A	#N/A	#N/A	#N/A	#N/A
175	0	1	0	Bacillus cereus gene for 16S rRNA, partial sequence, strain: GMC437	CGCCGCGTGAGTGATGAAGGCTTTCGGGTCGTAAAACTCTGTTGTTAGGGAAGAACAAGTGCTAGTTGAATAAGCTGGCACCTTGACGGTACCTAACCAGAAAGCCACGGCTAACTACGTGCCAGCAGCCGCGGTAATACGTAGGTGGCAAGCGTTATCCGGAATTATTGGGCGTAAAGCGCGCGCAGGTGGTTTCTTAAGTCTGATGTGAAAGCCCACGGCTCAACCGTGGAGGGTCATTGGAAACTGGGAGACTTGAGTGCAGAAGAGGAAAGTGGAATTCCATGTGTAGCGGTGAAATGCGTAGAGATATGGAGGAACACCAGTGGCGAAGGCGACTTTCTGGTCTGTAACTGACACTGAGGCGCGAAAGCGTGGGGAGCAAACAGGATTAGATAC…	#N/A	#N/A	#N/A	#N/A	#N/A	#N/A	#N/A
176	0	1	0	Bacillus anthracis strain AIMST 10.Mi.6 16S ribosomal RNA gene, partial sequence	GAGTGATGAAGGCTTTCGGGTCGTAAAACTCTGTTGTTAGGGAAGAACAAGTGCTAGTTGAATAAGCTGGCACCTTGACGGTACCTAACCAGAAAGCCACGGCTAACTACGTGCCAGCAGCCGCGGTAATACGTAGGTGGCAAGCGTTATCCGGAATTATTGGGCGTAAAGCGCGCGCAGGTGGTTTCTTAAGTCTGATGTGAAAGCCCACGGCTCAACCGTGGAGGGTCATTGGAAACTGGGAGACTTGAGTGCAGAAGAGGAAAGTGGAATTCCATGTGTAGCGGTGAAATGCGTAGAGATATGGAGGAACACCAGTGGCGAAGGCGACTTTCTGGTCTGTAACTGACACTGAGGCGCGAAAGCGTGGGGAGCAAACAGGATTAGATACTGGGGTAG…	#N/A	#N/A	#N/A	#N/A	#N/A	#N/A	#N/A
177	0	0	0	Bacillus thuringiensis strain Bc601, complete genome	#N/A	GTTACAGACCAGAAAGTCGCCTTCGCCACTGGTGTTCCTCCATATCTCTACGCATTTCACCGCTACACATGGAATTCCACTTTCCTCTTCTGCACTCAAGTCTCCCAGTTTCCAATGACCCTCCACGGTTGAGCCGTGGGCTTTCACATCAGACTTAAGAAACCACCTGCGCGCGCTTTACGCCCAATAATTCCGGATAACGCTTGCCACCTACGTATTACCGCGGCTGCTGGCACGTAGTTAGCCGTGGCTTTCTGGTTAGGTACCGTCAAGGTGCCAGCTTATTCAACTAGCACTTGTTCTTCCCTAACAACAGAGTTTTACGACCCGAAAGCCTTCATCACTCACGCGGCGTTGCTCCGTCAGACTTTCGTCCATTGCGGAAGATTCCCTACTGCT…	#N/A	#N/A	#N/A	#N/A	#N/A	#N/A
178	0	0	0	Bacillus cereus strain yasmun80b 16S ribosomal RNA gene, partial sequence	#N/A	GTTACAGACCAGAAAGTCGCCTTCGCCACTGGTGTTCCTCCATATCTCTACGCATTTCACCGCTACACATGGAATTCCACTTTCCTCTTCTGCACTCAAGTCTCCCAGTTTCCAATGACCCTCCACGGTTGAGCCGTGGGCTTTCACATCAGACTTAAGAAACCACCTGCGCGCGCTTTACGCCCAATAATTCCGGATAACGCTTGCCACCTACGTATTACCGCGGCTGCTGGCACGTAGTTAGCCGTGGCTTTCTGGTTAGGTACCGTCAAGGTGCCAGCTTATTCAACTAGCACTTGTTCTTCCCTAACAACAGAGTTTTACGACCCGAAAGCCTTCATCACTCACGCGGCGTTGCTCCGTCAGACTTTCGTCCATTGCGGAAGATTCCCTACTGCT…	#N/A	#N/A	#N/A	#N/A	#N/A	#N/A
179	0	0	0	Bacillus cereus strain yasmun80b 16S ribosomal RNA gene, partial sequence	#N/A	AGTTACAGACCAGAAAGTCGCCTTCGCCACTGGTGTTCCTCCATATCTCTACGCATTTCACCGCTACACATGGAATTCCACTTTCCTCTTCTGCACTCAAGTCTCCCAGTTTCCAATGACCCTCCACGGTTGAGCCGTGGGCTTTCACATCAGACTTAAGAAACCACCTGCGCGCGCTTTACGCCCAATAATTCCGGATAACGCTTGCCACCTACGTATTACCGCGGCTGCTGGCACGTAGTTAGCCGTGGCTTTCTGGTTAGGTACCGTCAAGGTGCCAGCTTATTCAACTAGCACTTGTTCTTCCCTAACAACAGAGTTTTACGACCCGAAAGCCTTCATCACTCACGCGGCGTTGCTCCGTCAGACTTTCGTCCATTGCGGAAGATTCCCTACTGC…	#N/A	#N/A	#N/A	#N/A	#N/A	#N/A
180	0	0	0	Sodalis sp. strain Bb-Pol-5 16S ribosomal RNA gene, partial sequence	#N/A	CGTCAGTCTTCGTCCAGGGGGCCGCCTTCGCCACCGGTATTCCTCCAGATCTCTACGCATTTCACCGCTACACCTGGAATTCTACCCCCCTCTACGAGACTCTAGCTTGCCAGTTTCAAATGCAGTTCCCGAGTTAAGCTCGGGGATTTCACATCTGACTTAACAAACCGCCTGCGTACGCTTTACGCCCAGTAATTCCGATTAACGCTCGCACCCTCCGTATTACCGCGGCTGCTGGCACGGAGTTAGCCGGTGCTTCTTCTGCGGGTAACGTCAATCAACAAGGTTATTAACCTTRTTGCCTTCCTCCCCGCTGAAAGTGCTTTACAACCCGAAGGCCTTCTTCACACACGCGGCATGGCTGCATCAGGCTTGCGCCCATTGTGCAATATTCCCCAC…	#N/A	#N/A	#N/A	#N/A	#N/A	#N/A
181	0	0	0	Moraxella sp. strain CRE4 16S ribosomal RNA gene, partial sequence	TGCCGCGTGTGTGAAGAAGGNCTTTTGGTTGTAAAGCACTTTAAGCAGGGAGGAGAGGCTAATGGTTAATACCCATTAGATTAGACGTTACCTGCAGAATAAGCACCGGCTAACTCTGTGCCAGCAGCCGCGGTAATACAGAGGGTGCGAGCGTTAATCGGAATTACTGGGCGTAAAGCGAGTGTAGGTGGCTCATTAAGTCACATGTGAAATCCCCGGGCTTAACCTGGGAACTGCATGTGATACTGGTGGTGCTAGAATATGTGAGAGGGAAGTAGAATTCCAGGTGTAGCGGTGAAATGCGTAGAGATCTGGAGGAATACCGATGGCGAAGGCAGCTTCCTGGCATAATATTGACACTGAGATTCGAAAGCGTGGGTAGCAAACAGGATTAGATAC…	#N/A	#N/A	#N/A	#N/A	#N/A	#N/A	#N/A
182	0	0	2	Pseudomonas congelans strain 508 chromosome, complete genome	ATGCCGCGTGTGTGAAGAAGGTCTTCGGATTGTAAAGCACTTTAAGTTGGGAGGAAGGGCAGTTACCTAATACGTGATTGTTTTGACGTTACCGACAGAATAAGCACCGGCTAACTCTGTGCCAGCAGCCGCGGTAATACAGAGGGTGCAAGCGTTAATCGGAATTACTGGGCGTAAAGCGCGCGTAGGTGGTTTGTTAAGTTGAATGTGAAATCCCCGGGCTCAACCTGGGAACTGCATCCAAAACTGGCAAGCTAGAGTATGGTAGAGGGTGGTGGAATTTCCTGTGTAGCGGTGAAATGCGTAGATATAGGAAGGAACACCAGTGGCGAAGGCGACCACCTGGACTGATACTGACACTGAGGTGCGAAAGCGTGGGGAGCAAACAGGATTAGATAC…	CAGTCCAGGTGGTCGCCTTCGCCACTGGTGTTCCTTCCTATATCTACGCATTTCACCGCTACACAGGAAATTCCACCACCCTCTACCATACTCTAGCTTGCCAGTTTTGGATGCAGTTCCCAGGTTGAGCCCGGGGATTTCACATTCAACTTAACAAACCACCTACGCGCGCTTTACGCCCAGTAATTCCGATTAACGCTTGCACCCTCTGTATTACCGCGGCTGCTGGCACAGAGTTAGCCGGTGCTTATTCTGTCGGTAACGTCAAAACAATCACGTATTAGGTAACTGCCCTTCCTCCCAACTTAAAGTGCTTTACAATCCGAAGACCTTCTTCACACACGCGGCATGGCTGGATCAGGCTTTCGCCCATTGTCCAATATTCCCCACTGCTGN	CANGTATCCGGCGGTTTGCACGGTGTAGGTGTTTCCGTGGTTAACGCCCTTTCAGAGCTTTTGCTGCTGACGGTTCGTCGTAGCGGCAAGATCTGGGAACAGACCTACGTCCATGGTGTTCCACAGGAACCGATGAAGATCGTCGGTGAAAGTGACAGCACAGGCACTCAGATTCACTTCAAGCCTTCCGCTGAAACGTTCAAGAACATCCATTTCAGCTGGGACATCCTGGCCAAGCGGATTCGTGAACTGTCCTTCCTGAACTCCGGTGTCGGCATTGTCCTCAAGGACGAGCGCAGTGGTAAGGAAGAGTTGTTCAAATACGAAGGCGGTCTGCGTGCATTCGTTGAATACCTGAACACCAACAAGACGCCGGTCAACGAAGTGTTCCACTTCAAC…	GATACGCAACTTGTCGATGTTGTACTCTTCACGGCCGATACCGCAGCCCAACGCAGTGATCAAGGTGCCCACTTCCTGCGAAGAGATCATCTTGTCGAAACGCGCTTTTTCAACGTTCAGGATCTTGCCCTTGAGCGGCAGGATGGCCTGGGTTCTACGGTTACGCCCCTGCTTGGCTGATCCGCCAGCAGAGTCCCCTTCCACCAGGTACAGTTCGGAGAGGGCAGGGTCCTTCTCCTGGCAGTCCGCCAGTTTGCCCGGCAGGCCAGCGATATCCAGCGCGCCTTTACGACGTGTCATCTCACGCGCCTTGCGCGCAGCTTCACGAGCACGGGCAGCGTCGATCATCTTGCCGACAACCGCTTTGGCTTCGTTCGGGTTTTCCAACAGGAAGTCGGA…	#N/A	#N/A	#N/A	#N/A
183	2	0	0	Rosenbergiella nectarea strain M75 16S ribosomal RNA gene, partial sequence	TGAAGAAGGCCTTCGGGTTGTAAAGTACTTTCAGTCAGGAGGAAGGGTGTGAAATTAATACTTTCATGCATTGACGTTACTGACAGAAGAAGCACCGGCTAACTCCGTGCCAGCAGCCGCGGTAATACGGAGGGTGCAAGCGTTAATCGGAATTACTGGGCGTAAAGCGCACGCAGGCGGTTTGTTAAGTCAGATGTGAAATCCCCGGGCTCAACCTGGGAACTGCATTTGAAACTGGCAAGCTTGAGTCTTGTAGAGGGGGGTAGAATTCCAGGTGTAGCGGTGAAATGCGTAGAGATCTGGAGGAATACCGGTGGCGAAGGCGGCCCCCTGGACAAAGACTGACGCTCAGGTGCGAAAGCGTGGGGAGCAAACAGGATTAGATACCCCNNGTAGT	#N/A	#N/A	#N/A	#N/A	#N/A	#N/A	#N/A
184	2	1	0	0	#N/A	#N/A	#N/A	#N/A	#N/A	#N/A	#N/A	#N/A
185	2	0	0	0	#N/A	#N/A	#N/A	#N/A	#N/A	#N/A	#N/A	#N/A
186	2	0	0	0	#N/A	#N/A	#N/A	#N/A	#N/A	#N/A	#N/A	#N/A
187	2	0	0	0	#N/A	#N/A	#N/A	#N/A	#N/A	#N/A	#N/A	#N/A
188	0	1	0	Bacillus sp. (in: Bacteria) strain HCV9 16S ribosomal RNA gene, partial sequence	GCCGCGTGAGTGATGAAGGCTTTCGGGTCGTAAAACTCTGTTGTTAGGGAAGAACAAGTGCTAGTTGAATAAGCTGGCACCTTGACGGTACCTAACCAGAAAGCCACGGCTAACTACGTGCCAGCAGCCGCGGTAATACGTAGGTGGCAAGCGTTATCCGGAATTATTGGGCGTAAAGCGCGCGCAGGTGGTTTCTTAAGTCTGATGTGAAAGCCCACGGCTCAACCGTGGAGGGTCATTGGAAACTGGGAGACTTGAGTGCAGAAGAGGAAAGTGGAATTCCATGTGTAGCGGTGAAATGCGTAGAGATATGGAGGAACACCAGTGGCGAAGGCGACTTTCTGGTCTGTAACTGACACTGAGGCGCGAAAGCGTGGGGAGCAAACAGGATTAGATACC…	#N/A	#N/A	#N/A	#N/A	#N/A	#N/A	#N/A
189	2	0	0	0	#N/A	#N/A	#N/A	#N/A	#N/A	#N/A	#N/A	#N/A
190	2	0	0	0	#N/A	#N/A	#N/A	#N/A	#N/A	#N/A	#N/A	#N/A
191	2	3	0	Pseudomonas panacis strain EU-LWNA-38 16S ribosomal RNA gene, partial sequence	TTGTAAAGCNCTTTNAGTTGGGAGGAAGGGCTGNNANTTAATACTTTNNNGTTTTGACNTTACCCACANAATAAGCNCCGGCTAACTCTGTGCCNNCNNCCGCGGTAATACNGAGGGTGCAAGCGTTNATCNGAATTNCTGGGCGTAAAGCGCNC	#N/A	#N/A	#N/A	#N/A	#N/A	#N/A	#N/A
192	0	0	0	0	#N/A	#N/A	#N/A	#N/A	#N/A	#N/A	#N/A	#N/A
193	0	0	0	0	#N/A	#N/A	#N/A	#N/A	#N/A	#N/A	#N/A	#N/A
194	1	0	0	0	#N/A	#N/A	#N/A	#N/A	#N/A	#N/A	#N/A	#N/A
195	3	1	0	Metschnikowia sp. 11-1089 clone Izi13364/e 18S ribosomal RNA gene, partial sequence; internal transcribed spacer 1 and 5.8S ribosomal RNA gene, complete sequence; and internal transcribed spacer 2, partial sequence	#N/A	#N/A	#N/A	#N/A	#N/A	#N/A	AGNNTGGGGCTAAAACTTATTCTAGCGCCGTTGATATTAGGCCGAAGCAGGACCAAACCGGAGGTTTGAGAGTAAATATCGCTCACCCACGCATGCCCTGGGGAATACCCCGGGGCGCAATGTGCGTTCAAAGATTCAATGATTCACGTCTGCAAGTCATATTACGTATCGCAATTCGCTGCGTTCTTCATCGATGCGAGAACCAAGAGATCCGTTGTTGAAAGTTTTTNAANANANTNWTTGACGGTTAAGATTTANAGTTTGTGCCTAAAAGGGTGTAAANTNNATTNTAATGANCCTTCCGCAGGTNCACCTACGGAAACCTTGTNACGACNTTTAC	CTTTTAGGCACAAACTCTAAATCTTAACCGTCAANNATTTTTTNAAAAAACTTTCAANAACGGATCTCTTGGTTCTCGCATCGANGAANAACGCAGCGAATTGCGATACGTAATATGACTTGCAGACGTGAATCNTTGAATCTTTGAACGCACATTGCGCCCCGGGGTATTCCCCAGGGCATGCGTGGGNGAGCGATATTTACTCTCAAACCTCCGGTTTGG
196	3	1	0	Metschnikowia aff. pulcherrima strain APC 1.2 chromosome VI, complete sequence	#N/A	#N/A	#N/A	#N/A	#N/A	#N/A	GGNTGGGGCTAAAACTTATTCTAGCGCCGTTGATATTAGGCCGAAGCAGGACCAAACCGGAGGTTTGAGAGTAAATATCGCTCACCCACGCATGCCCTGGGGAATACCCCGGGGCGCAATGTGCGTTCAAAGATTCAATGATTCACGTCTGCAAGTCATATTACGTATCGCAATTCGCTGCGTTCTTCATCGATGCGAGAACCAAGAGATCCGTTGTTGAAAGTTTTTTNATNNAGTNNTTGANGGTTAAGNTTTAGAGNTTGTGCCTAAAAGGGTGTAATWWYANTWTTAATGATCCTTCCGCAGGTTCACCTACGGAAACCTTGTTACGACTTTTACTTCCAAAG	ANTTTNTNAAAAAACTTTCAACAACGGATCTCTTGGTTCTCGCATCGATGAANAACGCAGCGAATTGCGATACGTAATATGACTTGCAGACGTGAATCATTGAATCTTTGAACGCACATTGCGCCCCGGGGTATTCCCCAGGGCATGCGTGGGTGAGCGATATTTACTCTCAAACCTCNGGTTTGGTCCTGCTTCGGCCTAATATCAACGGCGCTAGAATAAGTTTTAGCCCCANNCTTTTTCCTCACCCTCGTAANACTACCCGCTGAACTTAAGCATATCAATAAGNGGAGGAAAA
197	3	1	0	Metschnikowia aff. pulcherrima strain APC 1.2 chromosome VI, complete sequence	#N/A	#N/A	#N/A	#N/A	#N/A	#N/A	GGNTGGGGCTAAAACTTATTCTAGCGCCGTTGATATTAGGCCGAAGCAGGACCAAACCRGAGGTTTGAGAGTAAATATCGCTCACCCACGCATGCCCTGGGGAATACCCCGGGGCGCAATGTGCGTTCAAAGATTCAATGATTCACGTCTGCAAGTCATATTACGTATCGCAATTCGCTGCGTTCTTCATCGATGCGAGAACCAAGAGATCCGTTGTTGAAAGTTTTTTAATNNAGTNNTTGANGGTTAAGATTTAGAGTTTGTGCCTAAAAGGGTGTAATWWYAWTNTTAATGATCCTTCCGCAGGTTCACCTACGGAAACCTTGTTACGAT	NAAAAACTTTCNACAACGGATCTCTTGGTTCTCGCATCGATGAAGAACGCAGCGAATTGCGATACGTAATATGACTTGCANACGTGAATCATTGAATCTTTGAACGCACATTGCGCCCCGGGGTATTCCCCAGGGCATGCGTGGGNGAG
198	2	0	0	0	#N/A	#N/A	#N/A	#N/A	#N/A	#N/A	#N/A	#N/A
199	0	0	0	Pseudomonas sp. strain PG-260.1-B(133)JM 16S ribosomal RNA gene, partial sequence	AGGNCTTCGGATTGTAAAGCACTTTNAGTTGGGAGGAAGGGNNKKTNCCTAATACNNGATTGTTTTGACGTTACCNACAGAATAAGCACCGGCTAACTCNGTGCCAGCAGCCGCGGTAATACNGAGGGTGCAAGCGTTAATCGGAATTACTGGGCGTAAAGCGCNCGTAGGTGGTTTGTTAAGTTGGATGTGAAATCCCCGGGCTCAACCTGGGAACTGCATTCAAAACTGA	#N/A	#N/A	#N/A	#N/A	#N/A	#N/A	#N/A
200	0	0	0	Uncultured Pseudomonas sp. clone 603 16S ribosomal RNA gene, partial sequence	ATGCCGCGTGTGTGAAGAAGGTCTTCGGATTGTAAAGCACTTTAAGTTGGGAGGAAGGGCAGTAAGCGAATACCTTGCTGTTTTGACGTTACCGACAGAATAAGCACCGGCTAACTCTGTGCCAGCAGCCGCGGTAATACAGAGGGTGCAAGCGTTAATCGGAATTACTGGGCGTAAAGCGCGCGTAGGTGGTTTGTTAAGTTGAATGTGAAATCCCCGGGCTCAACCTGGGAACTGCATCCAAAACTGGCAAGCTAGAGTAGGGCAGAGGGTGGTGGAATTTCCTGTGTAGCGGTGAAATGCGTAGATATAGGAAGGAACACCAGTGGCGAAGGCGACCACCTGGGCTCATACTGACACTGAGGTGCGAAAGCGTGGGGAGCAAACAGGATTANATAC…	#N/A	#N/A	#N/A	#N/A	#N/A	#N/A	#N/A
201	0	0	0	Pseudomonas sp. strain 2180 16S ribosomal RNA gene, partial sequence	NTTTANGTTGGGAGGAAGGGCAGTAAGCGAATACCTTGCTGTTTTGACGTTACCGACAGAATAAGCACCGGCTAACTCTGTGCCNGCAGCCGCGGTAATACAGAGGGTGCAAGCGTTAATCGGAATTACTGGGCGTAAAGCNCGCGTAGGTGGTTTGTTAAGTTGAATGTGAAATCCCCGGGCTCAACCTGGGAACTGCATCCAAAACTGGCAAGCTAGAGTANGGNAGAGGGTGGTGGAATTTCCTGTGTANCGGTGAAATGCGTANATATANGAAGGAACACCAGTGGCGAAGGCGACCACCTGGGCTCATACTGACACTGAGGTGCGAAAGCGTGGGGAGCAAACAGGATTANATACC	#N/A	#N/A	#N/A	#N/A	#N/A	#N/A	#N/A
202	0	0	0	0	#N/A	#N/A	#N/A	#N/A	#N/A	#N/A	#N/A	#N/A
203	0	0	0	Pseudomonas sp. strain 2180 16S ribosomal RNA gene, partial sequence	ATGCCGCGTGTGTGAAGAAGGTCTTCGGATTGTAAAGCACTTTAAGTTGGGAGGAAGGGCAGTAAGCGAATACCTTGCTGTTTTGACGTTACCGACAGAATAAGCACCGGCTAACTCTGTGCCAGCAGCCGCGGTAATACAGAGGGTGCAAGCGTTAATCGGAATTACTGGGCGTAAAGCGCGCGTAGGTGGTTTGTTAAGTTGAATGTGAAATCCCCGGGCTCAACCTGGGAACTGCATCCAAAACTGGCAAGCTAGAGTAGGGCAGAGGGTGGTGGAATTTCCTGTGTAGCGGTGAAATGCGTAGATATAGGAAGGAACACCAGTGGCGAAGGCGACCACCTGGGCTCATACTGACACTGAGGTGCGAAAGCGTGGGGAGCAAACAGGATTANATAC…	#N/A	#N/A	#N/A	#N/A	#N/A	#N/A	#N/A
204	0	0	0	Pseudomonas sp. strain EB42 16S ribosomal RNA gene, partial sequence	#N/A	#N/A	#N/A	#N/A	#N/A	#N/A	#N/A	#N/A
205	0	0	0	Pantoea agglomerans strain cqsM7 16S ribosomal RNA gene, partial sequence	AGCCATGCCGCGTGTATGAAGAAGGCCTTCGGGTTGTAAAGTACTTTCAGCGGGGAGGAAGGCGANGNGGTTAATAACCGCGTCGATTGACGTTACCCGCAGAANAAGCACCGGCTAACTCCGTGCCAGCAGCCGCGGTAATACGGAGGGTGCAAGCGTTAATCGGAATTACTGGGCGTAAAGCGCACGCAGGCGGTCTGTTAAGTCAGATGTGAAATCCCCGGGCTTAACCTGGGAACTGCATTTGAAACTGGCAGGCTTGAGTCTTGTAGAGGGGGGTAGAATTCCAGGTGTAGCGGTGAAATGCGTAGAGATCTGGAGGAATACCGGTGGCGAAGGCGGCCCCCTGGACAAAGACTGACGCTCAGGTGCGAAAGCGTGGGGAGCAAACAGGATTAG…	#N/A	#N/A	#N/A	#N/A	#N/A	#N/A	#N/A
206	0	0	0	Pseudomonas poae strain XJX-5 16S ribosomal RNA gene, partial sequence	ATGCCGCGTGTGTGAAGAAGGTCTTCGGATTGTAAAGCACTTTAAGTTGGGAGGAAGGGCAGTTACCTAATACGTGATTGTTTTGACGTTACCGACAGAATAAGCACCGGCTAACTCTGTGCCAGCAGCCGCGGTAATACAGAGGGTGCAAGCGTTAATCGGAATTACTGGGCGTAAAGCGCGCGTAGGTGGTTTGTTAAGTTGGATGTGAAATCCCCGGGCTCAACCTGGGAACTGCATTCAAAACTGACTGACTAGAGTATGGTAGAGGGTGGTGGAATTTCCTGTGTAGCGGTGAAATGCGTAGATATAGGAAGGAACACCAGTGGCGAAGGCGACCACCTGGACTAATACTGACACTGAGGTGCGAAAGCGTGGGGAGCAAACAGGATTAGATAC…	#N/A	#N/A	#N/A	#N/A	#N/A	#N/A	#N/A
207	0	2	0	0	#N/A	#N/A	#N/A	#N/A	#N/A	#N/A	#N/A	#N/A
208	2	0	0	Uncultured Pseudomonas sp. clone 61 16S ribosomal RNA gene, partial sequence	CCATGCCGCGTGTGTGAAGAAGGTCTTCGGATTGTAAAGCACTTTAAGTTGGGAGGAAGGGCAGTTACCTAATACGTGATTGTTTTGACGTTACCGACAGAATAAGCACCGGCTAACTCTGTGCCAGCAGCCGCGGTAATACAGAGGGTGCAAGCGTTAATCGGAATTACTGGGCGTAAAGCGCGCGTAGGTGGTTTGTTAAGTTGGATGTGAAATCCCCGGGCTCAACCTGGGAACTGCATTCAAAACTGACTGACTAGAGTATGGTAGAGGGTGGTGGAATTTCCTGTGTAGCGGTGAAATGCGTAGATATAGGAAGGAACACCAGTGGCGAAGGCGACCACCTGGACTAATACTGACACTGAGGTGCGAAAGCGTGGGGAGCAAACAGGATTAGAT…	#N/A	#N/A	#N/A	#N/A	#N/A	#N/A	#N/A
209	0	0	0	Pseudomonas sp. strain MZ3 16S ribosomal RNA gene, partial sequence	GGTCTTCGGATTGTAAAGCACTTTAAGTTGGGAGGAAGGGCAGTTACCTAATACGTGATTGTTTTGACGTTACCGACAGAATAAGCACCGGCTAACTCTGTGCCAGCAGCCGCGGTAATACAGAGGGTGCAAGCGTTAATCGGAATTACTGGGCGTAAAGCGCGCGTAGGTGGTTTGTTAAGTTGGATGTGAAATCCCCGGGCTCAACCTGGGAACTGCATTCAAAACTGACTGACTAGAGTATGGTAGAGGGTGGTGGAATTTCCTGTGTAGCGGTGAAATGCGTAGATATAGGAAGGAACACCAGTGGCGAAGGCGACCACCTGGACTAATACTGACACTGAGGTGCGAAAGCGTGGGGAGCAAACAGGATTAGATACCCGNGTAG	#N/A	#N/A	#N/A	#N/A	#N/A	#N/A	#N/A
210	1	0	0	Pantoea agglomerans strain cqsM7 16S ribosomal RNA gene, partial sequence	GCCATGCCGCGTGTATGAAGAAGGCCTTCGGGTTGTAAAGTACTTTCAGCGGGGAGGAAGGCGANGSGGTTAATAACCGCGTCGATTGACGTTACCCGCAGAAGAAGCACCGGCTAACTCCGTGCCAGCAGCCGCGGTAATACGGAGGGTGCAAGCGTTAATCGGAATTACTGGGCGTAAAGCGCACGCAGGCGGTCTGTTAAGTCAGATGTGAAATCCCCGGGCTTAACCTGGGAACTGCATTTGAAACTGGCAGGCTTGAGTCTTGTAGAGGGGGGTAGAATTCCAGGTGTAGCGGTGAAATGCGTAGAGATCTGGAGGAATACCGGTGGCGAAGGCGGCCCCCTGGACAAAGACTGACGCTCAGGTGCGAAAGCGTGGGGAGCAAACAGGATTAGA…	#N/A	#N/A	#N/A	#N/A	#N/A	#N/A	#N/A
211	2	0	0	Rosenbergiella nectarea strain ST23 16S ribosomal RNA gene, partial sequence	TGCAGCCATGCCGCGTGTATGAAGAAGGCCTTCGGGTTGTAAAGTACTTTCAGTCAGGAGGAAGGGTGTGAAATTAATACTTTCATGCATTGACGTTACTGACAGAAGAAGCACCGGCTAACTCCGTGCCAGCAGCCGCGGTAATACGGAGGGTGCAAGCGTTAATCGGAATTACTGGGCGTAAAGCGCACGCAGGCGGTTTGTTAAGTCAGATGTGAAATCCCCGGGCTCAACCTGGGAACTGCATTTGAAACTGGCAAGCTTGAGTCTTGTAGAGGGGGGTAGAATTCCAGGTGTAGCGGTGAAATGCGTAGAGATCTGGAGGAATACCGGTGGCGAAGGCGGCCCCCTGGACAAAGACTGACGCTCAGGTGCGAAAGCGTGGGGAGCAAACAGGAT…	#N/A	#N/A	#N/A	#N/A	#N/A	#N/A	#N/A
212	2	0	0	Rosenbergiella nectarea strain ST23 16S ribosomal RNA gene, partial sequence	ATGAAGAAGGCCTTCGGGTTGTAAAGTACTTTCAGTCAGGAGGAAGGGTGTGAAATTAATACTTTCATGCATTGACGTTACTGACAGAAGAAGCACCGGCTAACTCCGTGCCAGCAGCCGCGGTAATACGGAGGGTGCAAGCGTTAATCGGAATTACTGGGCGTAAAGCGCACGCAGGCGGTTTGTTAAGTCAGATGTGAAATCCCCGGGCTCAACCTGGGAACTGCATTTGAAACTGGCAAGCTTGAGTCTTGTAGAGGGGGGTAGAATTCCAGGTGTAGCGGTGAAATGCGTAGAGATCTGGAGGAATACCGGTGGCGAAGGCGGCCCCCTGGACAAAGACTGACGCTCAGGTGCGAAAGCGTGGGGAGCAAACAGGATTAGATACCCCNGTAG	#N/A	#N/A	#N/A	#N/A	#N/A	#N/A	#N/A
213	2	0	0	Rosenbergiella nectarea strain ST23 16S ribosomal RNA gene, partial sequence	ATGCCGCGTGTATGAAGAAGGCCTTCGGGTTGTAAAGTACTTTCAGTCAGGAGGAAGGGTGTGAAATTAATACTTTCATGCATTGACGTTACTGACAGAAGAAGCACCGGCTAACTCCGTGCCAGCAGCCGCGGTAATACGGAGGGTGCAAGCGTTAATCGGAATTACTGGGCGTAAAGCGCACGCAGGCGGTTTGTTAAGTCAGATGTGAAATCCCCGGGCTCAACCTGGGAACTGCATTTGAAACTGGCAAGCTTGAGTCTTGTAGAGGGGGGTAGAATTCCAGGTGTAGCGGTGAAATGCGTAGAGATCTGGAGGAATACCGGTGGCGAAGGCGGCCCCCTGGACAAAGACTGACGCTCAGGTGCGAAAGCGTGGGGAGCAAACAGGATTAGATAC…	#N/A	#N/A	#N/A	#N/A	#N/A	#N/A	#N/A
214	2	0	0	Rosenbergiella nectarea strain ST23 16S ribosomal RNA gene, partial sequence	AGCCATGCCGCGTGTATGAAGAAGGCCTTCGGGTTGTAAAGTACTTTCAGTCAGGAGGAAGGGTGTGAAATTAATACTTTCATGCATTGACGTTACTGACAGAAGAAGCACCGGCTAACTCCGTGCCAGCAGCCGCGGTAATACGGAGGGTGCAAGCGTTAATCGGAATTACTGGGCGTAAAGCGCACGCAGGCGGTTTGTTAAGTCAGATGTGAAATCCCCGGGCTCAACCTGGGAACTGCATTTGAAACTGGCAAGCTTGAGTCTTGTAGAGGGGGGTAGAATTCCAGGTGTAGCGGTGAAATGCGTAGAGATCTGGAGGAATACCGGTGGCGAAGGCGGCCCCCTGGACAAAGACTGACGCTCAGGTGCGAAAGCGTGGGGAGCAAACAGGATTAG…	#N/A	#N/A	#N/A	#N/A	#N/A	#N/A	#N/A
215	2	0	0	Rosenbergiella nectarea strain ST23 16S ribosomal RNA gene, partial sequence	ATGCCGCGTGTATGAAGAAGGCCTTCGGGTTGTAAAGTACTTTCAGTCAGGAGGAAGGGTGTGAAATTAATACTTTCATGCATTGACGTTACTGACAGAAGAAGCACCGGCTAACTCCGTGCCAGCAGCCGCGGTAATACGGAGGGTGCAAGCGTTAATCGGAATTACTGGGCGTAAAGCGCACGCAGGCGGTTTGTTAAGTCAGATGTGAAATCCCCGGGCTCAACCTGGGAACTGCATTTGAAACTGGCAAGCTTGAGTCTTGTAGAGGGGGGTAGAATTCCAGGTGTAGCGGTGAAATGCGTAGAGATCTGGAGGAATACCGGTGGCGAAGGCGGCCCCCTGGACAAAGACTGACGCTCAGGTGCGAAAGCGTGGGGAGCAAACAGGATTAGATACC	#N/A	#N/A	#N/A	#N/A	#N/A	#N/A	#N/A
216	2	0	0	Rosenbergiella nectarea strain M75 16S ribosomal RNA gene, partial sequence	TGCCGCGTGTATGAAGAAGGCCTTCGGGTTGTAAAGTACTTTCAGTCAGGAGGAAGGGTGTGAAATTAATACTTTCATGCATTGACGTTACTGACAGAAGAAGCACCGGCTAACTCCGTGCCAGCAGCCGCGGTAATACGGAGGGTGCAAGCGTTAATCGGAATTACTGGGCGTAAAGCGCACGCAGGCGGTTTGTTAAGTCAGATGTGAAATCCCCGGGCTCAACCTGGGAACTGCATTTGAAACTGGCAAGCTTGAGTCTTGTAGAGGGGGGTAGAATTCCAGGTGTAGCGGTGAAATGCGTAGAGATCTGGAGGAATACCGGTGGCGAAGGCGGCCCCCTGGACAAAGACTGACGCTCAGGTGCGAAAGCGTGGGGAGCAAACAGGATTAGATACC…	#N/A	#N/A	#N/A	#N/A	#N/A	#N/A	#N/A
217	2	0	0	Rosenbergiella nectarea strain ST23 16S ribosomal RNA gene, partial sequence	CCATGCCGCGTGTATGAAGAAGGCCTTCGGGTTGTAAAGTACTTTCAGTCAGGAGGAAGGGTGTGAAATTAATACTTTCATGCATTGACGTTACTGACAGAAGAAGCACCGGCTAACTCCGTGCCAGCAGCCGCGGTAATACGGAGGGTGCAAGCGTTAATCGGAATTACTGGGCGTAAAGCGCACGCAGGCGGTTTGTTAAGTCAGATGTGAAATCCCCGGGCTCAACCTGGGAACTGCATTTGAAACTGGCAAGCTTGAGTCTTGTAGAGGGGGGTAGAATTCCAGGTGTAGCGGTGAAATGCGTAGAGATCTGGAGGAATACCGGTGGCGAAGGCGGCCCCCTGGACAAAGACTGACGCTCAGGTGCGAAAGCGTGGGGAGCAAACAGGATTAGAT…	#N/A	#N/A	#N/A	#N/A	#N/A	#N/A	#N/A
218	2	0	0	Pseudomonas sp. strain 2180 16S ribosomal RNA gene, partial sequence	GATTGNAAAGCACTTTAAGTTGGGAGGAAGGGCAGTAAGCGAATACCTTGCTGTTTTGACGTTACCGACAGAATAAGCACCGGCTAACTCTGTGCCANCAGCCGCGGTAATACAGAGGGTGCAAGCGTTAATCGGAATTACNGGGCGTAAAGCGCGCGTAGGTGGTTTGTTAAGTTGAATGTGAAATCCCCGGGCTCAACCTGGGAACTGCATCCAAAACTGGCAAGCTAGAGTANGGCAGAGGGTGGTGGAATTTCCTGTGTANCGGTGAAATGCGTAGATATAGGAAGGAACACCAGTGGCGAAGGCGACCACCTGGGCTCATACTGACACTGAGGTGCGAAAGCGTGGGGAGCAAACAGGATTAGATACCCNNGTAG	#N/A	#N/A	#N/A	#N/A	#N/A	#N/A	#N/A
219	2	0	0	Pseudomonas sp. strain 2180 16S ribosomal RNA gene, partial sequence	GTCTTCGGATTGTAAAGCACTTTAAGTTGGGAGGAAGGGCAGTAAGCGAATACCTTGCTGTTTTGACGTTACCGACAGAATAAGCACCGGCTAACTCTGTGCCAGCAGCCGCGGTAATACAGAGGGTGCAAGCGTTAATCGGAATTACNGGGCGTAAAGCGCGCGTAGGTGGTTTGTTAAGTTGAATGTGAAATCCCCGGGCTCAACCTGGGAACTGCATCCAAAACTGGCAAGCTAGAGTAGGGCAGAGGGTGGTGGAATTTCCTGTGTAGCGGTGAAATGCGTAGATATAGGAAGGAACACCAGTGGCGAAGGCGACCACCTGGGCTCATACTGACACTGAGGTGCGAAAGCGTGGGGAGCAAACAGGATTANATACCCGNGTAG	#N/A	#N/A	#N/A	#N/A	#N/A	#N/A	#N/A
220	2	0	0	Pseudomonas sp. strain 2180 16S ribosomal RNA gene, partial sequence	GGATTGNAAAGCACTTTAAGTTGGGAGGAAGGGCAGTAAGCGAATACCTTGCTGTTTTGACGTTACCGACAGAATAAGCACCGGCTAACTCTGTGCCAGCAGCCGCGGTAATACAGAGGGTGCAAGCGTTAATCGGAATTACTGGGCGTAAAGCGCGCGTAGGTGGTTTGTTAAGTTGAATGTGAAATCCCCGGGCTCAACCTGGGAACTGCATCCAAAACTGGCAAGCTAGAGTAGGGCAGAGGGTGGTGGAATTTCCTGTGTAGCGGTGAAATGCGTAGATATAGGAAGGAACACCAGTGGCGAAGGCGACCACCTGGGCTCATACTGACACTGAGGTGCGAAAGCGTGGGGAGCAAACAGGATTAGATACCCG	#N/A	#N/A	#N/A	#N/A	#N/A	#N/A	#N/A
221	2	0	0	Pseudomonas sp. strain 2180 16S ribosomal RNA gene, partial sequence	ATGCCGCGTGTGTGAAGAAGGTCTTCGGATTGTAAAGCACTTTAAGTTGGGAGGAAGGGCAGTAAGCGAATACCTTGCTGTTTTGACGTTACCGACAGAATAAGCACCGGCTAACTCTGTGCCAGCAGCCGCGGTAATACAGAGGGTGCAAGCGTTAATCGGAATTACTGGGCGTAAAGCGCGCGTAGGTGGTTTGTTAAGTTGAATGTGAAATCCCCGGGCTCAACCTGGGAACTGCATCCAAAACTGGCAAGCTAGAGTAGGGCAGAGGGTGGTGGAATTTCCTGTGTAGCGGTGAAATGCGTAGATATAGGAAGGAACACCAGTGGCGAAGGCGACCACCTGGGCTCATACTGACACTGAGGTGCGAAAGCGTGGGGAGCAAACAGGATTAGATAC…	#N/A	#N/A	#N/A	#N/A	#N/A	#N/A	#N/A
222	2	0	0	0	CCATGCCGCGTGTATGAAGAAGGCCTTCGGGTTGTAAAGTACTTTCAGTCAGGAGGAAGGGTGTGAAATTAATACTTTCATGCATTGACGTTACTGACAGAAGAAGCACCGGCTAACTCCGTGCCAGCAGCCGCGGTAATACGGAGGGTGCAAGCGTTAATCGGAATTACTGGGCGTAAAGCGCACGCAGGCGGTTTGTTAAGTCAGATGTGAAATCCCCGGGCTCAACCTGGGAACTGCATTTGAAACTGGCAAGCTTGAGTCTTGTAGAGGGGGGTAGAATTCCAGGTGTAGCGGTGAAATGCGTAGAGATCTGGAGGAATACCGGTGGCGAAGGCGGCCCCCTGGACAAAGACTGACGCTCAGGTGCGAAAGCGTGGGGAGCAAACAGGATTAGAT…	#N/A	#N/A	#N/A	#N/A	#N/A	#N/A	#N/A
223	1	0	0	0	CCATGCCGCGTGTATGAAGAAGGCCTTCGGGTTGTAAAGTACTTTCAGTCAGGAGGAAGGGTGTGAAATTAATACTTTCATGCATTGACGTTACTGACAGAAGAAGCACCGGCTAACTCCGTGCCAGCAGCCGCGGTAATACGGAGGGTGCAAGCGTTAATCGGAATTACTGGGCGTAAAGCGCACGCAGGCGGTTTGTTAAGTCAGATGTGAAATCCCCGGGCTCAACCTGGGAACTGCATTTGAAACTGGCAAGCTTGAGTCTTGTAGAGGGGGGTAGAATTCCAGGTGTAGCGGTGAAATGCGTAGAGATCTGGAGGAATACCGGTGGCGAAGGCGGCCCCCTGGACAAAGACTGACGCTCAGGTGCGAAAGCGTGGGGAGCAAACAGGATTAGAT…	#N/A	#N/A	#N/A	#N/A	#N/A	#N/A	#N/A
224	0	0	0	0	#N/A	#N/A	#N/A	#N/A	#N/A	#N/A	#N/A	#N/A
225	2	0	0	0	TGCCGCGTGTGTGAAGAAGGTCTTCGGATTGTAAAGCACTTTAAGTTGGGAGGAAGGGCAGTAAGCGAATACCTTGCTGTTTTGACGTTACCGACAGAATAAGCACCGGCTAACTCTGTGCCAGCAGCCGCGGTAATACAGAGGGTGCAAGCGTTAATCGGAATTACTGGGCGTAAAGCGCGCGTAGGTGGTTTGTTAAGTTGAATGTGAAATCCCCGGGCTCAACCTGGGAACTGCATCCAAAACTGGCAAGCTAGAGTAGGGCAGAGGGTGGTGGAATTTCCTGTGTAGCGGTGAAATGCGTAGATATAGGAAGGAACACCAGTGGCGAAGGCGACCACCTGGGCTCATACTGACACTGAGGTGCGAAAGCGTGGGGAGCAAACAGGATTAGATACC…	#N/A	#N/A	#N/A	#N/A	#N/A	#N/A	#N/A
226	2	0	0	0	AGCCATGCCGCGTGTATGAAGAAGGCCTTCGGGTTGTAAAGTACTTTCAGTCAGGAGGAAGGGTGTGAAATTAATACTTTCATGCATTGACGTTACTGACAGAAGAAGCACCGGCTAACTCCGTGCCAGCAGCCGCGGTAATACGGAGGGTGCAAGCGTTAATCGGAATTACTGGGCGTAAAGCGCACGCAGGCGGTTTGTTAAGTCAGATGTGAAATCCCCGGGCTCAACCTGGGAACTGCATTTGAAACTGGCAAGCTTGAGTCTTGTAGAGGGGGGTAGAATTCCAGGTGTAGCGGTGAAATGCGTAGAGATCTGGAGGAATACCGGTGGCGAAGGCGGCCCCCTGGACAAAGACTGACGCTCAGGTGCGAAAGCGTGGGGAGCAAACAGGATTAG…	#N/A	#N/A	#N/A	#N/A	#N/A	#N/A	#N/A
227	2	0	0	0	TGCCGCGTGTATGAAGAAGGCCTTCGGGTTGTAAAGTACTTTCAGTCAGGAGGAAGGGTGTGAAATTAATACTTTCATGCATTGACGTTACTGACAGAAGAAGCACCGGCTAACTCCGTGCCAGCAGCCGCGGTAATACGGAGGGTGCAAGCGTTAATCGGAATTACTGGGCGTAAAGCGCACGCAGGCGGTTTGTTAAGTCAGATGTGAAATCCCCGGGCTCAACCTGGGAACTGCATTTGAAACTGGCAAGCTTGAGTCTTGTAGAGGGGGGTAGAATTCCAGGTGTAGCGGTGAAATGCGTAGAGATCTGGAGGAATACCGGTGGCGAAGGCGGCCCCCTGGACAAAGACTGACGCTCAGGTGCGAAAGCGTGGGGAGCAAACAGGATTAGATACC…	#N/A	#N/A	#N/A	#N/A	#N/A	#N/A	#N/A
228	2	0	0	0	TGCCGCGTGTATGAAGAAGGCCTTCGGGTTGTAAAGTACTTTCAGTCAGGAGGAAGGGTGTGAAATTAATACTTTCATGCATTGACGTTACTGACAGAAGAAGCACCGGCTAACTCCGTGCCAGCAGCCGCGGTAATACGGAGGGTGCAAGCGTTAATCGGAATTACTGGGCGTAAAGCGCACGCAGGCGGTTTGTTAANTCAGATGTGAAATCCCCGGGCTCAACCTGGGAACTGCATTTGAAACTGGCAAGCTTGAGTCTTGTAGAGGGGGGTAGAATTCCAGGTGTAGCGGTGAAATGCGTAGAGATCTGGAGGAATACCGGTGGCGAAGGCGGCCCCCTGGACAAAGACTGACGCTCAGGTGCGAAAGCGTGGGGAGCAAACAGGATTAGATACC…	#N/A	#N/A	#N/A	#N/A	#N/A	#N/A	#N/A
229	2	0	0	0	AGCCATGCCGCGTGTATGAAGAAGGCCTTCGGGTTGTAAAGTACTTTCAGTCAGGAGGAAGGGTGTGAAATTAATACTTTCATGCATTGACGTTACTGACAGAAGAAGCACCGGCTAACTCCGTGCCAGCAGCCGCGGTAATACGGAGGGTGCAAGCGTTAATCGGAATTACTGGGCGTAAAGCGCACGCAGGCGGTTTGTTAAGTCAGATGTGAAATCCCCGGGCTCAACCTGGGAACTGCATTTGAAACTGGCAAGCTTGAGTCTTGTAGAGGGGGGTAGAATTCCAGGTGTAGCGGTGAAATGCGTAGAGATCTGGAGGAATACCGGTGGCGAAGGCGGCCCCCTGGACAAAGACTGACGCTCAGGTGCGAAAGCGTGGGGAGCAAACAGGATTAN…	#N/A	#N/A	#N/A	#N/A	#N/A	#N/A	#N/A
230	0	0	0	0	NCCATGCCGCGTGTGTGAAGAAGGCCTTCGGGTTGTAAAGCACTTTCAGCGGGGAGGAAGGCAATAAGGTTAATAACCTTGTTGATTGACGTTACCCGCAGAAGAAGCACCGGCTAACTCCGTGCCAGCAGCCGCGGTAATACGGAGGGTGCGAGCGTTAATCGGAATTACTGGGCGTAAAGCGTACGCAGGCGGTTTGTTAAGTCAGATGTGAAATCCCCGAGCTTAACTCGGGAACTGCATTTGAAACTGGCAAGCTAGAGTCTCGTAGAGGGGGGTAGAATTCCAGGTGTAGCGGTGAAATGCGTAGAGATCTGGAGGAATACCGGTGGCGAAGGCGGCCCCCTGGACGAAGACTGACGCTCAGGTACGAAAGCGTGGGGAGCAAACAGGATTANA…	#N/A	#N/A	#N/A	#N/A	#N/A	#N/A	#N/A
231	2	1	0	0	#N/A	#N/A	#N/A	#N/A	#N/A	#N/A	#N/A	#N/A
232	0	0	0	0	GCTGNTTTGACGTTACCGACAGAATAAGCACCGGCTAACTCTGTGCCANCAGCCGCGGTAATACAGAGGGTGCAAGCGTTAATCGGAATTACTGGGCGTAAAGCGCGCNTANGTGGTTCGTTAANTTGGATGTGAAATCCCCGGGCTCAACCTGGNAACTGCATTCAAAACTGNCNAGCTAGANTATGGTAGAGGGTGGTGGAATTTCCTGTGTANCGGTGAAATGCGTANATATAGGAAGGAACACCANTGGCGAAGGCNACCACCTGGACTGATACTGACACTGAGGTGCGAAAGCGTGGGGAGCAAACAGGATTAGATACCCGAGTAGT	#N/A	#N/A	#N/A	#N/A	#N/A	#N/A	#N/A
233	2	0	0	0	AGGNNTTCGGATTGTAAAGCNCTTTNAGTTGGGANGAAGGGNNGTAAATTNATACTNTGNNGTTTTGACNTTACCGACAGAATAAGCNCCGGCTAACTCTGTGCCNNCANCCGCGGTAATACNGAGGGTGCAAGCGTTAATCGGAATTACTGGGCGTAAAGCGCGCGTANGTGGTTTGTTAAGTTGGATGTGAAATCCCCGGGCTCNACCTGGGAACTGCATTCNAAACTGNCNANNTANANTANGGTANANGGNGGTGGAATTTCCTGTGTAGCGGTGAAATGCGTANATATNGGAAGGAACACCAGTGGCGAAGGCGACCACCTGGACTGATACTGACACTGAGGTGCGAAAGCGTGGGGAGCAAACAGGATTAGATACCC	#N/A	#N/A	#N/A	#N/A	#N/A	#N/A	#N/A
234	0	1	0	0	#N/A	#N/A	#N/A	#N/A	#N/A	#N/A	#N/A	#N/A
235	2	0	0	0	ATGCCGCGTGTGTGAAGAAGGTCTTCGGATTGTAAAGCACTTTAAGTTGGGAGGAAGGGCAGTAAGCGAATACCTTGCTGTTTTGACGTTACCGACAGAATAAGCACCGGCTAACTCTGTGCCAGCAGCCGCGGTAATACAGAGGGTGCAAGCGTTAATCGGAATTACTGGGCGTAAAGCGCGCGTAGGTGGTTTGTTAAGTTGAATGTGAAATCCCCGGGCTCAACCTGGGAACTGCATCCAAAACTGGCAAGCTAGAGTAGGGCAGAGGGTGGTGGAATTTCCTGTGTAGCGGTGAAATGCGTAGATATAGGAAGGAACACCAGTGGCGAAGGCGACCACCTGGGCTCATACTGACACTGAGGTGCGAAAGCGTGGGGAGCAAACAGGATTAGATAC…	#N/A	#N/A	#N/A	#N/A	#N/A	#N/A	#N/A
236	1	0	0	0	ATGCCGCGTGTGTGAAGAAGGCCTTAGGGTTGTAAAGCACTTTCAGCGAGGAGGAAGGGTTCAGTGTTAATAGCACTGNACATTGACGTTACTCGCANAAGAAGCACCGGCTAACTCCGTGCCAGCANCCGCGGTAATACGGAGGGTGCAAGCGTTAATCGGAATTACTGGGCGTAAAGCGCACGCAGGCGGTTTGTTAAGTCAGATGTGAAATCCCCGAGCTTAACTTGGGAACTGCATTTGAAACTGGCAAGCTAGAGTCTTGTAGAGGGGGGTAGAATTCCNGGTGTAGCGGTGAAATGCGTAGAGATCTGGAGGAATACCGGTGGCGAAGGCGGCCCCCTGGACAAAGACTGACGCTCAGGTGCGAAAGCGTGGGGAGCAAACAGGATTAGATACC	#N/A	#N/A	#N/A	#N/A	#N/A	#N/A	#N/A
237	0	0	0	0	ATGCCGCGTGTGTGAAGAAGGNCTTNGGNTTGTAAAGCACTTTNAGYNRGGAGGAAGGGTTCNNTGTTAATACNNNTGAANWTTGACGTTACYSRCAGAAKAAGCACCGGCTAACTCYGTGCCAGCAGCCGCGGTAATACRGAGGGTGCAAGCGTTAATCGGAATTACTGGGCGTAAAGCGCAC	#N/A	#N/A	#N/A	#N/A	#N/A	#N/A	#N/A
238	0	0	0	0	ATGCCGCGTGTGTGAAGAAGGTCTTCGGATTGTAAAGCACTTTAAGTTGGGAGGAAGGGCCATTACCTAATACGTGATGGTYTTGACGTTACCGACAGAATAAGCACCGGCTAACTCTGTGCCAGCAGCCGCGGTAATACAGAGGGTGCAAGCGTTAATCGGAATTACTGGGCGTAAAGCGCGCGTAGGTGGTTTGTTAAGTTGGATGTGAAATCCCCGGGCTCAACCTGGGAACTGCATTCAAAACTGACTGACTAGAGTATGGTAGAGGGTGGTGGAATTTCCTGTGTAGCGGTGAAATGCGTAGATATAGGAAGGAACACCAGTGGCGAAGGCGACCACCTGGACTGATACTGACACTGAGGTGCGAAAGCGTGGGGAGCAAACAGGATTAGATAC…	#N/A	#N/A	#N/A	#N/A	#N/A	#N/A	#N/A
239	2	0	0	0	CNGCCATGCCGCGTGTGTGAAGAAGGTCTTCGGATTGTAAAGCACTTTAAGTTGGGAGGAAGGGTTGTAGATTAATACTCTGCAATTTTGACGTTACCGACAGAATAAGCACCGGCTAACTCTGTGCCAGCAGCCGCGGTAATACAGAGGGTGCAAGCGTTAATCGGAATTACTGGGCGTAAAGCGCGCGTAGGTGGTTTGTTAAGTTGGATGTGAAATCCCCGGGCTCAACCTGGGAACTGCATTCAAAACTGACTGACTAGAGTATGGTAGAGGGTGGTGGAATTTCCTGTGTAGCGGTGAAATGCGTAGATATAGGAAGGAACACCAGTGGCGAAGGCGACCACCTGGACTAATACTGACACTGAGGTGCGAAAGCGTGGGGAGCAAACAGGATTA…	#N/A	#N/A	#N/A	#N/A	#N/A	#N/A	#N/A
240	2	1	0	0	AGCCATGCCGCGTGTGTGAAGAAGGNCTTNGGNTTGTAAAGCACTTTMAGNTNGGAGGAAGGGTTNNANNTTAATACNCNNNAANTTTGACGTTACNNACAGAATAAGCACCGGCTAACTCYGTGCCAGCAGCCGCGGTAATACNGAGGGTGCAAGCGTTAATCGGAATTACTGGGCGTAAAGCGCNCGT	#N/A	#N/A	#N/A	#N/A	#N/A	#N/A	#N/A
241	2	0	0	0	AAGGNCTTNGGNTTGTAAAGCACTTTNAGYNNGGAGGAAGGGTTCNNNGNTAATANCNCTGNNCATTGACGTTACTCNCAGAAKAAGCACCGGCTAACTCCGTGCCAGCAGCCGCGGTAATACRGAGGGTGCAAGCGTTAATCGGAATTACTGGGCGTAAAGCGCACGCA	#N/A	#N/A	#N/A	#N/A	#N/A	#N/A	#N/A
242	0	1	0	0	#N/A	#N/A	#N/A	#N/A	#N/A	#N/A	#N/A	#N/A
243	0	0	0	Pseudomonas azotoformans strain BS&H38 16S ribosomal RNA	#N/A	#N/A	#N/A	#N/A	#N/A	#N/A	#N/A	#N/A
244	0	0	0	Pseudomonas azotoformans strain P45A chromonsome, complete genome	#N/A	GTATCAGTCCAGGTGGTCGCCTTCGCCACTGGTGTTCCTTCCTATATCTACGCATTTCACCGCTACACAGGAAATTCCACCACCCTCTACCATACTCTAGTCAGTCAGTTTTGAATGCAGTTCCCAGGTTGAGCCCGGGGATTTCACATCCAACTTAACAAACCACCTACGCGCGCTTTACGCCCAGTAATTCCGATTAACGCTTGCACCCTCTGTATTACCGCGGCTGCTGGCACAGAGTTAGCCGGTGCTTATTCTGTCGGTAACGTCAARACCATCACGTATTAGGTAATGGCCCTTCCTCCCAACTTAAAGTGCTTTACAATCCGAAGACCTTCTTCACACACGCGGCATGGCTGGATCAGGCTTTCGCCCATTGTCCAATATTCCCCACTGCTG…	#N/A	#N/A	#N/A	#N/A	#N/A	#N/A
245	1	0	0	0	#N/A	GTCAGTATTAGTCCAGGTGGTCGCCTTCGCCACTGGTGTTCCTTCCTATATCTACGCATTTCACCGCTACACAGGAAATTCCACCACCCTCTACCATACTCTAGTCAGTCAGTTTTGAATGCAGTTCCCAGGTTGAGCCCGGGGATTTCACATCCAACTTAACAAACCACCTACGCGCGCTTTACGCCCAGTAATTCCGATTAACGCTTGCACCCTCTGTATTACCGCGGCTGCTGGCACAGAGTTAGCCGGTGCTTATTCTGTCGGTAACGTCAAAATTGCAGAGTATTAATCTACAACCCTTCCTCCCAACTTAAAGTGCTTTACAATCCGAAGACCTTCTTCACACACGCGGCATGGCTGGATCAGGCTTTCGCCCATTGTCCAATATTCCCCACT…	#N/A	#N/A	#N/A	#N/A	#N/A	#N/A
246	0	0	0	0	#N/A	#N/A	#N/A	#N/A	#N/A	#N/A	#N/A	#N/A
247	1	0	0	0	#N/A	#N/A	#N/A	#N/A	#N/A	#N/A	#N/A	#N/A
248	1	4	2	Bacillus velezensis strain B268 chromosome, complete genome	TGAAGGTTTTCGGATCGTAAAGCTCTGTTGTTAGGGAAGAACAAGTGCCGTTCAAATAGGGCGGCACCTTGACGGTACCTAACCAGAAAGCCACGGCTAACTACGTGCCAGCAGCCGCGGTAATACGTAGGTGGCAAGCGTTGTCCGGAATTATTGGGCGTAAAGGGCTCGCAGGCGGTTTCTTAAGTCTGATGTGAAAGCCCCCGGCTCAACCGGGGAGGGTCATTGGAAACTGGGGAACTTGAGTGCAGAAGAGGAGAGTGGAATTCCACGTGTAGCGGTGAAATGCGTAGAGATGTGGAGGAACACCAGTGGCGAAGGCGACTCTCTGGTCTGTAACTGACGCTGAGGAGCGAAAGCGTGGGGAGCGAACAGGATTAGATACCCCNGTAGT	#N/A	CGGCGGTCTTCACGGTGTAGGGGCATCCGTCGTAAACGCCTTGTCGACCACTCTTGACGTTACGGTTCATCGTGACGGAAAAATCCATTATCAGGCGTACGAGCGCGGTGTACCTGTGGCCGATCTTGAAGTGATCGGCGAAACTGATAAGACCGGAACGATTACGCACTTCGTTCCGGACCCGGAAATTTTCAAAGAAACAACTGTATATGACTATGATCTGCTTTCAAACCGTGTCCGGGAATTGGCCTTCCTGACAAAAGGCGTAAACATCACGATTGAAGACAAACGTGAAGGACAAGAACGGAAAAACGAGTACCACTACGAAGGCGGAATCAAAAGCTATGTTGAGTACTTAAACCGTTCCAAAGAAGTCGTTCATGAAGAGCCGATTTATAT…	NATACGCGCTTTTTCAGATTAAAATCTTCTCCRAWTCCKGTTCCGAGGGCCGTGATCATTGATCTGACCTCATTGTTTGAGAGAATCTTATCAAGTCTGGCTTTCTCAACGTTCAGAATCTTACCGCGCAGCGGCAGAATGGCTTGGAAATGACGGTCCCGTCCCTGTTTCGCTGATCCGCCCGCAGAGTCACCCTCTACGATATACAGCTCGGAAATGCTCGGATCTTTAGAAGAACAGTCCGCCAGTTTGCCCGGCAGATTGGAAATCTCAAGCGCACTTTTGCGCCGGGTCAATTCCCGGGCTTTTTTCGCCGCCATCCGCGCTCTTGCGGCCATTAAACCTTTTTCAACGATTTTGCGGGCTGAGTCCGGATTTTCAAGAAGGAATGTTTCCAGC…	#N/A	CTTGTATAGCTGTCGTTGTATTGCAATGCAACTTCAACCGTTATGCCGTCTTTCTCGCCTTCNATATAAATCGGCTCTTCATGAACGACTTCTTTGGAACGGTTTAAGTACTCAACATAGCTTTTGATTCCGCCTTCGTAGTGGTACTCGTTTTTCCGTTCTTGTCCTTCACGTTTGTCTTCAATCGTGATGTTTACNCCTTTTGTCAGGAAGGCCAATTCCCGGACACGGTTTGAAAGCANATCATAGTCATATACAGTTGTTTCTTTGAAAATTTCCGGGTCCGGAACGAAGTGCGTAATCGTTCCGGTCTTATCAGTTTCGCCNATCACTTCAAGATCGGCCACAGGTACACCGCGCTCGTACGCCTGATAATGGATTTTTCCGTCACGATGAACC…	#N/A	#N/A
249	2	0	0	0	#N/A	#N/A	#N/A	#N/A	#N/A	#N/A	#N/A	#N/A
250	2	0	0	0	#N/A	#N/A	#N/A	#N/A	#N/A	#N/A	#N/A	#N/A
251	2	0	0	0	#N/A	#N/A	#N/A	#N/A	#N/A	#N/A	#N/A	#N/A
252	0	0	0	0	#N/A	#N/A	#N/A	#N/A	#N/A	#N/A	#N/A	#N/A
253	0	0	0	0	#N/A	#N/A	#N/A	#N/A	#N/A	#N/A	#N/A	#N/A
254	0	0	0	0	#N/A	#N/A	#N/A	#N/A	#N/A	#N/A	#N/A	#N/A
255	2	0	0	0	#N/A	#N/A	#N/A	#N/A	#N/A	#N/A	#N/A	#N/A
256	1	0	0	0	#N/A	#N/A	#N/A	#N/A	#N/A	#N/A	#N/A	#N/A
257	0	0	0	0	#N/A	#N/A	#N/A	#N/A	#N/A	#N/A	#N/A	#N/A
258	1	0	0	0	#N/A	#N/A	#N/A	#N/A	#N/A	#N/A	#N/A	#N/A
259	0	0	0	0	#N/A	#N/A	#N/A	#N/A	#N/A	#N/A	#N/A	#N/A
260	2	2	0	0	#N/A	#N/A	#N/A	#N/A	#N/A	#N/A	#N/A	#N/A
261	0	0	0	0	#N/A	#N/A	#N/A	#N/A	#N/A	#N/A	#N/A	#N/A
262	0	0	0	0	#N/A	#N/A	#N/A	#N/A	#N/A	#N/A	#N/A	#N/A
263	0	0	0	0	#N/A	#N/A	#N/A	#N/A	#N/A	#N/A	#N/A	#N/A
264	1	0	0	0	#N/A	#N/A	#N/A	#N/A	#N/A	#N/A	#N/A	#N/A
265	0	0	0	0	#N/A	#N/A	#N/A	#N/A	#N/A	#N/A	#N/A	#N/A
266	0	0	0	0	#N/A	#N/A	#N/A	#N/A	#N/A	#N/A	#N/A	#N/A
267	0	0	0	0	#N/A	#N/A	#N/A	#N/A	#N/A	#N/A	#N/A	#N/A
268	0	0	0	0	#N/A	#N/A	#N/A	#N/A	#N/A	#N/A	#N/A	#N/A
269	0	0	0	0	#N/A	#N/A	#N/A	#N/A	#N/A	#N/A	#N/A	#N/A
270	0	0	0	0	#N/A	#N/A	#N/A	#N/A	#N/A	#N/A	#N/A	#N/A
271	0	0	0	0	#N/A	#N/A	#N/A	#N/A	#N/A	#N/A	#N/A	#N/A
272	0	0	0	0	#N/A	#N/A	#N/A	#N/A	#N/A	#N/A	#N/A	#N/A
273	0	0	0	0	#N/A	#N/A	#N/A	#N/A	#N/A	#N/A	#N/A	#N/A
274	0	0	0	0	#N/A	#N/A	#N/A	#N/A	#N/A	#N/A	#N/A	#N/A
275	0	1	0	0	#N/A	#N/A	#N/A	#N/A	#N/A	#N/A	#N/A	#N/A
276	0	0	0	0	#N/A	#N/A	#N/A	#N/A	#N/A	#N/A	#N/A	#N/A
277	0	0	0	0	#N/A	#N/A	#N/A	#N/A	#N/A	#N/A	#N/A	#N/A
278	0	0	0	0	#N/A	#N/A	#N/A	#N/A	#N/A	#N/A	#N/A	#N/A
279	0	0	0	0	#N/A	#N/A	#N/A	#N/A	#N/A	#N/A	#N/A	#N/A
280	0	0	0	0	#N/A	#N/A	#N/A	#N/A	#N/A	#N/A	#N/A	#N/A
281	0	0	0	0	#N/A	#N/A	#N/A	#N/A	#N/A	#N/A	#N/A	#N/A
282	1	1	0	0	#N/A	#N/A	#N/A	#N/A	#N/A	#N/A	#N/A	#N/A
283	0	0	0	0	#N/A	#N/A	#N/A	#N/A	#N/A	#N/A	#N/A	#N/A
284	2	1	0	0	#N/A	#N/A	#N/A	#N/A	#N/A	#N/A	#N/A	#N/A
285	0	0	0	0	#N/A	#N/A	#N/A	#N/A	#N/A	#N/A	#N/A	#N/A
286	1	0	0	0	#N/A	#N/A	#N/A	#N/A	#N/A	#N/A	#N/A	#N/A
287	0	0	0	0	#N/A	#N/A	#N/A	#N/A	#N/A	#N/A	#N/A	#N/A
288	0	0	0	0	#N/A	#N/A	#N/A	#N/A	#N/A	#N/A	#N/A	#N/A
289	0	0	0	0	#N/A	#N/A	#N/A	#N/A	#N/A	#N/A	#N/A	#N/A
290	0	0	0	0	#N/A	#N/A	#N/A	#N/A	#N/A	#N/A	#N/A	#N/A
291	0	0	0	0	#N/A	#N/A	#N/A	#N/A	#N/A	#N/A	#N/A	#N/A
292	2	0	0	0	#N/A	#N/A	#N/A	#N/A	#N/A	#N/A	#N/A	#N/A
293	0	1	0	0	#N/A	#N/A	#N/A	#N/A	#N/A	#N/A	#N/A	#N/A
294	0	0	0	0	#N/A	#N/A	#N/A	#N/A	#N/A	#N/A	#N/A	#N/A
295	0	1	0	0	#N/A	#N/A	#N/A	#N/A	#N/A	#N/A	#N/A	#N/A
296	1	0	0	0	#N/A	#N/A	#N/A	#N/A	#N/A	#N/A	#N/A	#N/A
297	2	0	0	0	#N/A	#N/A	#N/A	#N/A	#N/A	#N/A	#N/A	#N/A
298	0	1	0	0	#N/A	#N/A	#N/A	#N/A	#N/A	#N/A	#N/A	#N/A
299	0	0	0	0	#N/A	#N/A	#N/A	#N/A	#N/A	#N/A	#N/A	#N/A
300	0	0	1	Pseudomonas sp. 15A4 chromosome, complete genome	GTCTTCGGATTGTAAAGCACTTTAAGTTGGGAGGAAGGGCAGTAAGCGAATACCTTGCTGTTTTGACGTTACCGACAGAATAAGCACCGGCTAACTCTGTGCCAGCAGCCGCGGTAATACAGAGGGTGCAAGCGTTAATCGGAATTACTGGGCGTAAAGCGCGCGTAGGTGGTTTGTTAAGTTGAATGTGAAATCCCCGGGCTCAACCTGGGAACTGCATCCAAAACTGGCAAGCTAGAGTAGGGCAGAGGGTGGTGGAATTTCCTGTGTAGCGGTGAAATGCGTAGATATAGGAAGGAACACCAGTGGCGAAGGCGACCACCTGGGCTCATACTGACACTGAGGTGCGAAAGCGTGGGGAGCAAACAGGATTAGATAC	GTGTCAGTATGAGCCCAGGTGGTCGCCTTCGCCACTGGTGTTCCTTCCTATATCTACGCATTTCACCGCTACACAGGAAATTCCACCACCCTCTGCCCTACTCTAGCTTGCCAGTTTTGGATGCAGTTCCCAGGTTGAGCCCGGGGATTTCACATTCAACTTAACAAACCACCTACGCGCGCTTTACGCCCAGTAATTCCGATTAACGCTTGCACCCTCTGTATTACCGCGGCTGCTGGCACAGAGTTAGCCGGTGCTTATTCTGTCGGTAACGTCAAAACAGCAAGGTATTCGCTTACTGCCCTTCCTCCCAACTTAAAGTGCTTTACAATCCGAAGACCTTCTTCACACACGCGGCATGGCTGGATCAGGCTTTCGCCCATTGTCCAATATTCCCCA…	ANGTATCCGGCGGTCTGCACGGTGTGGGCGTTTCAGTAGTGAATGCGCTGTCCGAGGTTCTAAACCTCACTGTGCGCCGGAGCGGAAAAGTCTGGGAACAGACGTACGTCCACGGTGTTCCACAAGAGCCGATGCAGATCGTCGGCGAAAGCGACACCACAGGCACTGAGATTCACTTCAAGCCTTCCGCTGAGACCTTCAAGAACATTCACTTCAGCTGGGACATCCTGGCCAAGCGGATTCGCGAACTGTCCTTCCTCAACTCCGGCGTGGGCATCGTTCTTAAAGACGAGCGCAGCGGTAAGGAAGAGCTGTTCAAATATGAAGGCGGTCTGCGGGCGTTCGTTGAATACCTGAACACCAACAAGACACCTGTGAACCAGGTCTTCCACTTCAACA…	CGCAGCTTTTCATGTTGTACTCGTCACGGCCAATACCGCAGCCCAGTGCAGTGATCAACGTGCCCACTTCTTGGGACGAGATCATCTTGTCGAAGCGCGCCTTCTCCACGTTCAGGATCTTGCCCTTGAGTGGCAGGATGGCCTGAGTCTTGCGGTTACGCCCCTGCTTGGCGGAGCCGCCAGCAGAGTCACCTTCCACAAGATACAGTTCGGAAAGGGCAGGGTCCTTTTCCTGGCAGTCAGCCAGTTTGCCGGGAAGGCCTGCAATATCCAGCGCACCTTTACGACGAGTCATCTCACGCGCTTTACGCGCGGCTTCACGAGCACGTGCTGCGTCRATCATCTTGCCGACAACGGCTTTCGCTTCGTTCGGGTTCTCGAGCAGGAAGTCAGAGAAGT…	#N/A	#N/A	#N/A	#N/A
301	0	0	0	0	#N/A	#N/A	#N/A	#N/A	#N/A	#N/A	#N/A	#N/A
302	0	0	0	0	#N/A	#N/A	#N/A	#N/A	#N/A	#N/A	#N/A	#N/A
303	0	1	0	0	#N/A	#N/A	#N/A	#N/A	#N/A	#N/A	#N/A	#N/A
304	0	0	0	0	#N/A	#N/A	#N/A	#N/A	#N/A	#N/A	#N/A	#N/A
305	1	0	0	0	#N/A	#N/A	#N/A	#N/A	#N/A	#N/A	#N/A	#N/A
306	2	0	0	0	#N/A	#N/A	#N/A	#N/A	#N/A	#N/A	#N/A	#N/A
307	2	0	0	0	#N/A	#N/A	#N/A	#N/A	#N/A	#N/A	#N/A	#N/A
308	2	0	0	0	#N/A	#N/A	#N/A	#N/A	#N/A	#N/A	#N/A	#N/A
309	0	0	0	0	#N/A	#N/A	#N/A	#N/A	#N/A	#N/A	#N/A	#N/A
310	0	0	0	0	#N/A	#N/A	#N/A	#N/A	#N/A	#N/A	#N/A	#N/A
311	0	2	0	0	#N/A	#N/A	#N/A	#N/A	#N/A	#N/A	#N/A	#N/A
312	0	0	0	0	#N/A	#N/A	#N/A	#N/A	#N/A	#N/A	#N/A	#N/A
313	0	0	0	0	#N/A	#N/A	#N/A	#N/A	#N/A	#N/A	#N/A	#N/A
314	0	0	0	0	#N/A	#N/A	#N/A	#N/A	#N/A	#N/A	#N/A	#N/A
315	0	0	0	0	#N/A	#N/A	#N/A	#N/A	#N/A	#N/A	#N/A	#N/A
316	0	0	0	0	#N/A	#N/A	#N/A	#N/A	#N/A	#N/A	#N/A	#N/A
317	0	0	0	0	#N/A	#N/A	#N/A	#N/A	#N/A	#N/A	#N/A	#N/A
318	0	0	0	0	#N/A	#N/A	#N/A	#N/A	#N/A	#N/A	#N/A	#N/A
319	0	0	0	0	#N/A	#N/A	#N/A	#N/A	#N/A	#N/A	#N/A	#N/A
320	0	0	0	0	#N/A	#N/A	#N/A	#N/A	#N/A	#N/A	#N/A	#N/A
321	0	0	0	0	#N/A	#N/A	#N/A	#N/A	#N/A	#N/A	#N/A	#N/A
322	0	0	0	0	#N/A	#N/A	#N/A	#N/A	#N/A	#N/A	#N/A	#N/A
323	0	0	0	0	#N/A	#N/A	#N/A	#N/A	#N/A	#N/A	#N/A	#N/A
324	2	0	0	Pantoea agglomerans strain DBM 3797 chromosome, complete genome	#N/A	GTCAGTCTTTGTCCAGGGGGCCGCCTTCGCCACCGGTRTTCCTCCNNATCTCTACGCATTTCACCGCTACACCTGNAATTCTACCCCCCTCTACMAKACTCAAGCCTGCCAGTTTCAAATGCAGTTCCCAGGTTAAGCCCGGGGATTTCACATCTGACTTAACARACCGCCTGCGYGCGCTTTACGCCCAGTAATTCCGATTAACGCTTGCACCCTCCGTATTACCGCGGCTGCTGGCACNGAGTTAGCCGGTGCTTCTTCTGCGGGTAACGTCAANCNACNNGGTTATTAANCNCNTNNCCTTCCTCCCCGCTGAAAGTNCTTTACAACCCGAAGNCCTTCTTCATACACGCGGCATGGCTGCATCAGGCTTGCGCCCATTGTGCAATATTCCCCACT…	#N/A	#N/A	#N/A	#N/A	#N/A	#N/A
325	0	1	0	Pseudomonas extremaustralis strain WS-1 16S ribosomal RNA gene, partial sequence	#N/A	AGTATCAGTCCAGGTGGTCGCCTTCGCCACTGGTGTTCCTTCCTATATCTACGCATTTCACCGCTACACAGGAAATTCCACCACCCTCTACCATACTCTAGTCAGTCAGTTTTGAATGCAGTTCCCAGGTTGAGCCCGGGGATTTCACATCCAACTTAACAAACCACCTACGCGCGCTTTACGCCCAGTAATTCCGATTAACGCTTGCACCCTCTGTATTACCGCGGCTGCTGGCACAGAGTTAGCCGGTGCTTATTCTGTCGGTAACGTCAAAACAATCACGTATTAGGTAACTGCCCTTCCTCCCAACTTAAAGTGCTTTACAATCCGAAGACCTTCTTCACACACGCGGCATGGCTGGATCAGGCTTTCGCCCATTGTCCAATATTCCCCACTGCT…	#N/A	#N/A	#N/A	#N/A	#N/A	#N/A
326	0	1	0	Pseudomonas extremaustralis strain WS-1 16S ribosomal RNA gene, partial sequence	#N/A	GTGTCAGTATCAGTCCAGGTGGTCGCCTTCGCCACTGGTGTTCCTTCCTATATCTACGCATTTCACCGCTACACAGGAAATTCCACCACCCTCTACCATACTCTAGTCAGTCAGTTTTGAATGCAGTTCCCAGGTTGAGCCCGGGGATTTCACATCCAACTTAACAAACCACCTACGCGCGCTTTACGCCCAGTAATTCCGATTAACGCTTGCACCCTCTGTATTACCGCGGCTGCTGGCACAGAGTTAGCCGGTGCTTATTCTGTCGGTAACGTCAAAACAATCACGTATTAGGTAACTGCCCTTCCTCCCAACTTAAAGTGCTTTACAATCCGAAGACCTTCTTCACACACGCGGCATGGCTGGATCAGGCTTTCGCCCATTGTCCAATATTCCCCA…	#N/A	#N/A	#N/A	#N/A	#N/A	#N/A
327	0	0	0	Pseudomonas syringae strain HV 03 16S ribosomal RNA gene, partial sequence	#N/A	CAGTCCAGGTGGTCGCCTTCGCCACTGGTGTTCCTTCCTATATCTACGCATTTCACCGCTACACAGGAAATTCCACCACCCTCTACCATACTCTAGCTTGCCAGTTTTGGATGCAGTTCCCAGGTTGAGCCCGGGGATTTCACATTCAACTTAACAAACCACCTACGCGCGCTTTACGCCCAGTAATTCCGATTAACGCTTGCACCCTCTGTATTACCGCGGCTGCTGGCACAGAGTTAGCCGGTGCTTATTCTGTCGGTAACGTCAAAACAANNACGTATTAGGTAACTGCCCTTCCTCCCAACTTAAAGTGCTTTACAATCCGAAGACCTTCTTCACACACGCGGCATGGCTGGATCAGGCTTTCGCCCATTGTCCAATATTCCCCACTGCTGNCCC…	#N/A	#N/A	#N/A	#N/A	#N/A	#N/A
328	0	0	0	0	#N/A	#N/A	#N/A	#N/A	#N/A	#N/A	#N/A	#N/A
329	0	0	0	Pseudomonas graminis strain PgKB30 chromosome, complete genome	#N/A	GTGTCAGTATGAGCCCAGGTGGTCGCCTTCGCCACTGGTGTTCCTTCCTATATCTACGCATTTCACCGCTACACAGGAAATTCCACCACCCTCTGCCCTACTCTAGCTTGCCAGTTTTGGATGCAGTTCCCAGGTTGAGCCCGGGGATTTCACATTCAACTTAACAAACCACCTACGCGCGCTTTACGCCCAGTAATTCCGATTAACGCTTGCACCCTCTGTATTACCGCGGCTGCTGGCACAGAGTTAGCCGGTGCTTATTCTGTCGGTAACGTCAAAACAGCAAGGTATTCGCTTACTGCCCTTCCTCCCAACTTAAAGTGCTTTACAATCCGAAGACCTTCTTCACACACGCGGCATGGCTGGATCAGGCTTTCGCCCATTGTCCAATATTCCCCA…	#N/A	#N/A	#N/A	#N/A	#N/A	#N/A
330	2	0	0	0	#N/A	#N/A	#N/A	#N/A	#N/A	#N/A	#N/A	#N/A
331	2	0	0	0	#N/A	#N/A	#N/A	#N/A	#N/A	#N/A	#N/A	#N/A
332	3	2	0	Metschnikowia pulcherrima isolate 8 18S ribosomal RNA gene, partial sequence; internal transcribed spacer 1 and 5.8S ribosomal RNA gene, complete sequence; and internal transcribed spacer 2, partial sequence	#N/A	#N/A	#N/A	#N/A	#N/A	#N/A	GGCTGGGGCTAAAACTTATTCTAGCGCCGTTGATATTAGGCCGAAGCAGGACCAAACCGGAGGTTTGAGAGTAAATATCGCTCACCCACGCATGCCCTGGGGAATACCCCGGGGCGCAATGTGCGTTCAAAGATTCAATGATTCACGTCTGCAAGTCATATTACGTATCGCAATTCGCTGCGTTCTTCATCGATGCGAGAACCAAGAGATCCGTTGTTGAAAGTTTTTTNAANGANTNNTTGACGGTTAANATTTANAGTTTGTGCCTAAAAGGGTGTAANAANNTTTTTAANGATCCTTCCGCAGGTTCACCTACGGAAACCTTGTTACNAT	#N/A
333	0	0	0	Pseudomonas sp. strain 3B-In-57 16S ribosomal RNA gene, partial sequence	#N/A	GTTCCTYCNNATMTCTACGCATTTCACCGCTACACMKGNAATTCNACCMCCCTCTACMANACTCTAGTCWGYCAGTTTYRAATGCAGTTCCCAGGTTNAGCCCGGGGATTTCACATCNNACTTRACARACCRCCTNCGNGCGCTTTACGCCCAGTAATTCCGATTAACGCTTGCACCCTCYGTATTACCGCGGCTGCTGGCACRGAGTTAGCCGGTGCTTA	#N/A	#N/A	#N/A	#N/A	#N/A	#N/A
334	0	1	0	Pseudomonas sp. strain PG-260.1-B(133)JM 16S ribosomal RNA gene, partial sequence	#N/A	CCAGGTGGTCGCCTTCGCCACTGGTGTTCCTTCCTATATCTACGCATTTCACCGCTACACAGGAAATTCCACCACCCTCTACCATACTCTAGTCAGTCAGTTTTGAATGCAGTTCCCAGGTTGAGCCCGGGGATTTCACATCCNACTTAACAAACCACCTACGCGCGCTTTACGCCCAGTAATTCCGATTAACGCTTGCACCCTCTGTATTACCGCGGCTGCTGGCACAGAGTTAGCCGGTGCTTATTCTGTCGGTAACGTCAAAACAATCACGTATTANGTAACTGCCCTTCCTCCCAACTTAAAGTGCTTTACAATCCGAAGACCTTCTTCACACACGCGGCATGGCTGGATCAGGCTTTCGCCCATTGTCCAATATTCCCCACTGCTGCA	#N/A	#N/A	#N/A	#N/A	#N/A	#N/A
335	0	0	0	Pseudomonas congelans strain cqsV19 16S ribosomal RNA gene, partial sequence	#N/A	GTATCAGTCCAGGTGGTCGCCTTCGCCACTGGTGTTCCTTCCTATATCTACGCATTTCACCGCTACACAGGAAATTCCACCACCCTCTACCATACTCTAGCTTGCCAGTTTTGGATGCAGTTCCCAGGTTGAGCCCGGGGATTTCACATTCAACTTAACAAACCACCTACGCGCGCTTTACGCCCAGTAATTCCGATTAACGCTTGCACCCTCTGTATTACCGCGGCTGCTGGCACAGAGTTAGCCGGTGCTTATTCTGTCGGTAACGTCAAAACAANNACGTATTAGGTAACTGCCCTTCCTCCCAACTTAAAGTGCTTTACAATCCGAAGACCTTCTTCACACACGCGGCATGGCTGGATCAGGCTTTCGCCCATTGTCCAATATTCCCCACTGCTG…	#N/A	#N/A	#N/A	#N/A	#N/A	#N/A
336	0	1	0	Pseudomonas extremaustralis strain WS-1 16S ribosomal RNA gene, partial sequence	#N/A	GTCAGTATCAGTCCAGGTGGTCGCCTTCGCCACTGGTGTTCCTTCCTATATCTACGCATTTCACCGCTACACAGGAAATTCCACCACCCTCTACCATACTCTAGTCAGTCAGTTTTGAATGCAGTTCCCAGGTTGAGCCCGGGGATTTCACATCCAACTTAACAAACCACCTACGCGCGCTTTACGCCCAGTAATTCCGATTAACGCTTGCACCCTCTGTATTACCGCGGCTGCTGGCACAGAGTTAGCCGGTGCTTATTCTGTCGGTAACGTCAAAACAATCACGTATTAGGTAACTGCCCTTCCTCCCAACTTAAAGTGCTTTACAATCCGAAGACCTTCTTCACACACGCGGCATGGCTGGATCAGGCTTTCGCCCATTGTCCAATATTCCCCACT…	#N/A	#N/A	#N/A	#N/A	#N/A	#N/A
337	0	1	0	0	#N/A	#N/A	#N/A	#N/A	#N/A	#N/A	#N/A	#N/A
338	0	0	0	0	#N/A	#N/A	#N/A	#N/A	#N/A	#N/A	#N/A	#N/A
339	0	0	0	Erwinia billingiae strain CIBCM-Mg-115 16S ribosomal RNA gene, partial sequence	#N/A	CGTCAGTCTTTGTCCAGGGGGCCGCCTTCGCCACCGGTATTCCTCCAGATCTCTACGCATTTCACCGCTACACCTGGAATTCTACCCCCCTCTACAAGACTCTAGCCTGCCAGTTTCAAATGCAGTTCCCAGGTTAAGCCCGGGGATTTCACATCTGACTTGACAGACCGCCTGCGTGCGCTTTACGCCCAGTAATTCCGATTAACGCTTGCACCCTCCGTATTACCGCGGCTGCTGGCACGGAGTTAGCCGGTGCTTCTTCTGCGGGTAACGTCAATCGANAAGGTTATTAACCTTATCGCCTTCCTCCCCGCTGAAAGTACTTTACAACCCGAAGGCCTTCTTCATACACGCGGCATGGCTGCATCAGGCTTGCGCCCATTGTGCAATATTCCCCAC…	#N/A	#N/A	#N/A	#N/A	#N/A	#N/A
340	0	0	0	Klebsiella pneumoniae subsp. pneumoniae strain MRSN752019 chromosome, complete genome	#N/A	GTCAGTCTTTGTCCAGGGGGCCGCCTTCGCCACCGGTRTTCCTYCNKATMTCTACGCATTTCACCGCTACACCNGRAATTCYACCCCCCTCTACMAKACTCTAGCYTGCCAGTTTNNAATGCAGTTCCCAGGTTAAGCCCGGGGATTTCACATNNGACTTGACARACCGCCTGCGNGCGCTTTACGCCCAGTAATTCCGATTAACGCTTGCACCCTCNGTATTACCGCGGCTGCTGGCACRGAGTTAGCCGGTGCTTCTTCTGCGGGTAACGTCAANCNANAAGGTTATTAANCTTATCNCCTTCCTCCCCGCTGAAAGTNCTTTACAACCCGAAGNCCTTCTTCANACACGCGGCATGGCTGNATCAGGCTTGCGCCCATTGTGCAATATTCCCCACT…	#N/A	#N/A	#N/A	#N/A	#N/A	#N/A
341	0	0	0	Pseudomonas sp. strain MB320 16S ribosomal RNA gene, partial sequence	#N/A	AGTATCAGTCCAGGTGGTCGCCTTCGCCACTGGTGTTCCTTCCTATATCTACGCATTTCACCGCTACACAGGAAATTCCACCACCCTCTACCATACTCTAGCTCGTCAGTTTTGAATGCAGTTCCCAGGTTGAGCCCGGGGATTTCACATCCAACTTAACGAACCACCTACGCGCGCTTTACGCCCAGTAATTCCGATTAACGCTTGCACCCTCTGTATTACCGCGGCTGCTGGCACAGAGTTAGCCGGTGCTTATTCTGTCGGTAACGTCAAAACAGCAAAGTATTAATTTACTGCCCTTCCTCCCAACTTAAAGTGCTTTACAATCCGAAGACCTTCTTCACACACGCGGCATGGCTGGATCAGGCTTTCGCCCATTGTCCAATATTCCCCACTGCT…	#N/A	#N/A	#N/A	#N/A	#N/A	#N/A
342	0	0	0	0	#N/A	#N/A	#N/A	#N/A	#N/A	#N/A	#N/A	#N/A
343	0	0	0	0	#N/A	#N/A	#N/A	#N/A	#N/A	#N/A	#N/A	#N/A
344	0	0	0	0	#N/A	#N/A	#N/A	#N/A	#N/A	#N/A	#N/A	#N/A
345	0	0	0	Erwinia billingiae strain CIBCM-Mg-115 16S ribosomal RNA gene, partial sequence	#N/A	CGTCAGTCTTTGTCCAGGGGGCCGCCTTCGCCACCGGTATTCCTCCAGATCTCTACGCATTTCACCGCTACACCTGGAATTCTACCCCCCTCTACAAGACTCTAGCCTGCCAGTTTCAAATGCAGTTCCCAGGTTAAGCCCGGGGATTTCACATCTGACTTGACAGACCGCCTGCGTGCGCTTTACGCCCAGTAATTCCGATTAACGCTTGCACCCTCCGTATTACCGCGGCTGCTGGCACGGAGTTAGCCGGTGCTTCTTCTGCGGGTAACGTCAATCGAYAAGGTTATTAACCTTATCGCCTTCCTCCCCGCTGAAAGTACTTTACAACCCGAAGGCCTTCTTCATACACGCGGCATGGCTGCATCAGGCTTGCGCCCATTGTGCAATATTCCCCAC…	#N/A	#N/A	#N/A	#N/A	#N/A	#N/A
346	0	0	0	0	#N/A	#N/A	#N/A	#N/A	#N/A	#N/A	#N/A	#N/A
347	0	0	0	0	#N/A	#N/A	#N/A	#N/A	#N/A	#N/A	#N/A	#N/A
348	0	0	0	Erwinia billingiae strain CIBCM-Mg-115 16S ribosomal RNA gene, partial sequence	#N/A	CGTCAGTCTTTGTCCAGGGGGCCGCCTTCGCCACCGGTATTCCTCCAGATCTCTACGCATTTCACCGCTACACCTGGAATTCTACCCCCCTCTACAAGACTCTAGCCTGCCAGTTTCAAATGCAGTTCCCAGGTTAAGCCCGGGGATTTCACATCTGACTTGACAGACCGCCTGCGTGCGCTTTACGCCCAGTAATTCCGATTAACGCTTGCACCCTCCGTATTACCGCGGCTGCTGGCACGGAGTTAGCCGGTGCTTCTTCTGCGGGTAACGTCAATCGAYAAGGTTATTAACCTTATCGCCTTCCTCCCCGCTGAAAGTACTTTACAACCCGAAGGCCTTCTTCATACACGCGGCATGGCTGCATCAGGCTTGCGCCCATTGTGCAATATTCCCCAC…	#N/A	#N/A	#N/A	#N/A	#N/A	#N/A
349	0	0	0	0	#N/A	#N/A	#N/A	#N/A	#N/A	#N/A	#N/A	#N/A
350	0	0	0	Enterobacter hormaechei strain Colony257 chromosome	#N/A	TTCCTNCMKATMTCTACGCATTTCACCGCTACACMKGRAATTCYACCNCCCTCTACMANACTCTAGNCTGCCAGTTTYRAATGCAGTTCCCAGGTTRAGCCCGGGGATTTCACATCNGACTTGACARACCGCCTGCGNGCGCTTTACGCCCAGTAATTCCGATTAACGCTTGCACCCTCYGTATTACCGCGGCTGCTGGCACGGAGTTAGCCGGTGCTTCTTCTGCGGGTAACGTCAATCGANAAGGTTATTAACCTTATCGCCTTCCTCCCCGCTGAAAGTACTTTACAACCCGAAGGCCTTCTTCATACACGCGGCATGGCTGCATCAGGCTTGCGCCCATTGTGCAATATTCCCCACTGCTGCCCCCCGTAGAAACGTTGTCGCTGAAGCNACTGG…	#N/A	#N/A	#N/A	#N/A	#N/A	#N/A
351	0	0	0	Frondihabitans sp. strain YMA_33 16S ribosomal RNA gene, partial sequence	#N/A	ACGGCCCAGAGATCTGCCTTCGCCATCGGTGTTCCTCCTGATATCTGCGCATTCCACCGCTACACCAGGAATTCCAATCTCCCCTACCGCACTCTAGTCTGCCCGTACCCACTGCAGGCTGGGGGTTGAGCCCCCAGATTTCACAGCAGACGCGACAAACCGCCTACGAGCTCTTTACGCCCAATAATTCCGGACAACGCTTGCACCCTACGTATTACCGCGGCTGCTGGCACGTAGTTAGCCGGTGCTTTTTCTGCTGGTACCGTCAAGAGCAAGCTCCCTTCTTCCCAACTAAAAGAGGTTTACAACCCGAAGGCCGTCGTCCCTCACGCGGCGTTGCTGCATCAGGCTTTCGCCCATTGTGCAATATTCCCCACTGCTGN	#N/A	#N/A	#N/A	#N/A	#N/A	#N/A
352	1	0	0	Erwinia billingiae strain CIBCM-Mg-115 16S ribosomal RNA gene, partial sequence	#N/A	CGTCAGTCTTTGTCCAGGGGGCCGCCTTCGCCACCGGTATTCCTCCAGATCTCTACGCATTTCACCGCTACACCTGGAATTCTACCCCCCTCTACAAGACTCTAGCCTGCCAGTTTCAAATGCAGTTCCCAGGTTAAGCCCGGGGATTTCACATCTGACTTGACAGACCGCCTGCGTGCGCTTTACGCCCAGTAATTCCGATTAACGCTTGCACCCTCCGTATTACCGCGGCTGCTGGCACGGAGTTAGCCGGTGCTTCTTCTGCGGGTAACGTCAATCGAYAAGGTTATTAACCTTATCGCCTTCCTCCCCGCTGAAAGTACTTTACAACCCGAAGGCCTTCTTCATACACGCGGCATGGCTGCATCAGGCTTGCGCCCATTGTGCAATATTCCCCAC…	#N/A	#N/A	#N/A	#N/A	#N/A	#N/A
353	0	0	0	Rhodococcus sp. strain Voy40th21a-4 16S ribosomal RNA gene, partial sequence	#N/A	AGCGTCAGTTGTTTCCCAGAGACCCGCCTTCGCCACCGGTGTTCCTCCTGATATCTGCGCATTTCACCGCTACACCAGGAATTCCAGTCTCCCCTGAAACACTCAAGTCTGCCCGTATCGCCTGCAAGCCCGAAGTTGAGCCCCGGGTTTTCACAAACGACGCGACAAACCGCCTACGAACTCTTTACGCCCAGTAATTCCGGACAACGCTCGCACCCTACGTATTACCGCGGCTGCTGGCACGTAGTTAGCCGGTGCTTCTTCTGCAGGTACCGTCACTCACGCTTCGTCCCTGCTGAAAGAGGTTTACAACCCGAAGGCCTTCATCCCTCACGCGGCGTCGCTGCATCAGGCTTCCGCCCATTGTGCAATATTCCCCACTGCTGN	#N/A	#N/A	#N/A	#N/A	#N/A	#N/A
354	0	3	0	Erwinia billingiae strain TH88 chromosome, complete genome	GTATGAAGAAGGCCTTCGGGTTGTAAAGTACTTTCAGCGGGGAGGAAGGCGATAAGGTTAATAACCTTGTCGATTGACGTTACCCGCAGAAGAAGCACCGGCTAACTCCGTGCCAGCAGCCGCGGTAATACGGAGGGTGCAAGCGTTAATCGGAATTACTGGGCGTAAAGCGCACGCAGGCGGTCTGTCAAGTCAGATGTGAAATCCCCGGGCTTAACCTGGGAACTGCATTTGAAACTGGCAGGCTAGAGTCTTGTAGAGGGGGGTAGAATTCCAGGTGTAGCGGTGAAATGCGTAGAGATCTGGAGGAATACCGGTGGCGAAGGCGGCCCCCTGGACAAAGACTGACGCTCAGGTGCGAAAGCGTGGGGAGCAAACAGGATTAGATACCCNGG	CGTCAGTCTTTGTCCAGGGGGCCGCCTTCGCCACCGGTATTCCTCCAGATCTCTACGCATTTCACCGCTACACCTGGAATTCTACCCCCCTCTACAAGACTCTAGCCTGCCAGTTTCAAATGCAGTTCCCAGGTTAAGCCCGGGGATTTCACATCTGACTTGACAGACCGCCTGCGTGCGCTTTACGCCCAGTAATTCCGATTAACGCTTGCACCCTCCGTATTACCGCGGCTGCTGGCACGGAGTTAGCCGGTGCTTCTTCTGCGGGTAACGTCAATCGANAAGGTTATTAACCTTATCGCCTTCCTCCCCGCTGAAAGTACTTTACAACCCGAAGGCCTTCTTCATACACGCGGCATGGCTGCATCAGGCTTGCGCCCATTGTGCAATATTCCCCAC…	GTTTCCGGTGGTCTGCACGGCGTCGGCGTGTCAGTGGTTAACGCCCTGTCTGAAAAGCTGGAGCTGACCATTCGCCGCGAAGGCAAGGTTCACAATCAGATTTACGTTCATGGCGTGCCACAGGCCCCACTGCACGTGACCGGTGAAACCGATCTGACCGGTACCCGCGTACGTTTCTGGCCAAGCCATCARACCTTCACCAACGTGACCGATTTCGAGTATGAAATCCTCGCCAAGCGTCTGCGTGAGCTGTCGTTCCTGAACTCCGGCGTGTCGATCAAGCTGGAAGACAAGCGTGATGCTCGTCAGGATCACTATCACTACGAAGGCGGCATCAAGGCGTTCGTTGAGTACCTGAACAAGAACAAAACCCCGATTCACCCAAATGTCTTCTATTTC…	TACGCAGTTTGTCCGGGTTGTATTCGTCACGGCCGATGCCGCAGCCCAGCGCGGTGATCAGCGTGGCAACTTCCTGCGAGGCGAGCATCTTATCGAAGCGCGCTTTCTCAACGTTGAGGATTTTACCTTTCAACGGCAGGATCGCCTGGTTTTTACGGTTACGTCCCTGCTTGGCGGAGCCGCCTGCAGAGTCACCCTCCACCAGGTAGATTTCGCACAGCGCCGGGTCACGCTCCTGACAGTCAGCCAGTTTGCCTGGCAGACCCGCCAGATCCAGCGCGCCTTTACGGCGGGTCATTTCACGCGCACGACGGGCCGCTTCACGGGCACGGGCCGCATCAATAATTTTACCGACCACGATTTTCGCATCGGTCGGGTTTTCCAGCAGGTATTCCGCCA…	#N/A	#N/A	#N/A	#N/A
355	2	1	0	0	#N/A	#N/A	#N/A	#N/A	#N/A	#N/A	#N/A	#N/A
356	0	0	0	0	#N/A	#N/A	#N/A	#N/A	#N/A	#N/A	#N/A	#N/A
357	0	1	0	0	#N/A	#N/A	#N/A	#N/A	#N/A	#N/A	#N/A	#N/A
358	2	0	0	Erwinia billingiae strain CIBCM-Mg-115 16S ribosomal RNA gene, partial sequence	#N/A	CGTCAGTCTTTGTCCAGGGGGCCGCCTTCGCCACCGGTATTCCTCCAGATCTCTACGCATTTCACCGCTACACCTGGAATTCTACCCCCCTCTACAAGACTCTAGCCTGCCAGTTTCAAATGCAGTTCCCAGGTTAAGCCCGGGGATTTCACATCTGACTTGACAGACCGCCTGCGTGCGCTTTACGCCCAGTAATTCCGATTAACGCTTGCACCCTCCGTATTACCGCGGCTGCTGGCACGGAGTTAGCCGGTGCTTCTTCTGCGGGTAACGTCAATCGAYAAGGTTATTAACCTTATCGCCTTCCTCCCCGCTGAAAGTACTTTACAACCCGAAGGCCTTCTTCATACACGCGGCATGGCTGCATCAGGCTTGCGCCCATTGTGCAATATTCCCCAC…	#N/A	#N/A	#N/A	#N/A	#N/A	#N/A
359	0	0	0	0	#N/A	#N/A	#N/A	#N/A	#N/A	#N/A	#N/A	#N/A
360	0	0	0	0	#N/A	#N/A	#N/A	#N/A	#N/A	#N/A	#N/A	#N/A
361	0	0	0	Bacillus wiedmannii strain NWUBe04 ribosomal RNA gene, partial sequence	#N/A	CAGTTACAGACCAGAAAGTCGCCTTCGCCACTGGTGTTCCTCCATATCTCTACGCATTTCACCGCTACACATGGAATTCCACTTTCCTCTTCTGCACTCAAGTCTCCCAGTTTCCAATGACCCTCCACGGTTGAGCCGTGGGCTTTCACATCAGACTTAAGAAACCACCTGCGCGCGCTTTACGCCCAATAATTCCGGATAACGCTTGCCACCTACGTATTACCGCGGCTGCTGGCACGTAGTTAGCCGTGGCTTTCTGGTTAGGTACCGTCAAGGTGCCAGCTTATTCAACTAGCACTTGTTCTTCCCTAACAACAGAGTTTTACGACCCGAAAGCCTTCATCACTCACGCGGCGTTGCTCCGTCAGACTTTCGTCCATTGCGGAAGATTCCCTACTG…	#N/A	#N/A	#N/A	#N/A	#N/A	#N/A
362	1	1	0	Klebsiella pneumoniae subsp. pneumoniae KPNIH10, complete genome	#N/A	GGGGNCGCCTTCGCCACYGGTRTTCCTYCNNATMTCTACGCATTTCACCGCTACACMKGRAATTCYACCNCCCTCTACMANACTCTAGNNTGCCAGTTTYNAATGCAGTTCCCAGGTTNAGCCCGGGGATTTCACATCNNACTTNACAAACCRCCTNCGNGCGCTTTACGCCCAGTAATTCCGATTAACGCTTGCACCCTCNGTATTACCGCGGCTGCTGGCACRGAGTTAGCCGGTGCTTCTTCTGNNGGTAACGTCAANNNACAAGGNTATTAANCTTATGCCCTTCCTCCCCGCTGAAAGTGCTTTACAACCCGAAGACCTTCTTCANACACGCGGCATGGCTGNATCAGGCTTNCGCCCATTGTN	#N/A	#N/A	#N/A	#N/A	#N/A	#N/A
363	0	0	0	0	#N/A	#N/A	#N/A	#N/A	#N/A	#N/A	#N/A	#N/A
364	0	0	0	0	#N/A	#N/A	#N/A	#N/A	#N/A	#N/A	#N/A	#N/A
365	0	0	0	0	#N/A	#N/A	#N/A	#N/A	#N/A	#N/A	#N/A	#N/A
366	2	1	0	Pseudomonas fluorescens strain R6-28-08 chromosome, complete genome	#N/A	AGTATTAGTCNAGGTGGTCGCCTTCGCCACTGGTGTTCCTTCNTATATCTACGCATTTCACNGCTACACAGGAAATTCNACCACANNCNACNATACTCTAGTCAGTCAGTTTTGAATGCAGTTCCCAGGTTGAGCCCGGGNATTTCACATCCAANTTAACAAACCNCC	#N/A	#N/A	#N/A	#N/A	#N/A	#N/A
367	2	1	0	Pseudomonas fluorescens strain UTB_111 16S ribosomal RNA gene, partial sequence	#N/A	GTCAGTATTAGTCMAGGTGGTCGCCTTCGCCACTGGTGTTCCTTCNTATATCTACGCATTTCACCGCTACACAGGAAATTCCACCACNNTCNACMATACTCTAGTCAGTCAGTTTTGAATGCAGTTCCCAGGTTGAGCCCGGGGATTTCACATCCAACTTAACAAACCACNNACGCGCGCTTTACGCCCAGTAATTCCGATTAACGCTTGCACCANCNGTATTACCGCGGCTGNTGGCACANAGTTANCCGGTGCTTATTCTGTCGGNAACGTCAAAACACTAACGTATTAGGTTAATGCCCTTCCTCC	#N/A	#N/A	#N/A	#N/A	#N/A	#N/A
368	2	1	0	Erwinia billingiae strain CIBCM-Mg-115 16S ribosomal RNA gene, partial sequence	#N/A	CGTCAGTCTTTGTCCAGGGGGCCGCCTTCGCCACCGGTATTCCTCCAGATCTCTACGCATTTCACCGCTACACCTGGAATTCTACCCCCCTCTACAAGACTCTAGCCTGCCAGTTTCAAATGCAGTTCCCAGGTTAAGCCCGGGGATTTCACATCTGACTTGACAGACCGCCTGCGTGCGCTTTACGCCCAGTAATTCCGATTAACGCTTGCACCCTCCGTATTACCGCGGCTGCTGGCACGGAGTTAGCCGGTGCTTCTTCTGCGGGTAACGTCAATCGAYAAGGTTATTAACCTTATCGCCTTCCTCCCCGCTGAAAGTACTTTACAACCCGAAGGCCTTCTTCATACACGCGGCATGGCTGCATCAGGCTTGCGCCCATTGTGCAATATTCCCCAC…	#N/A	#N/A	#N/A	#N/A	#N/A	#N/A
369	2	1	0	0	#N/A	#N/A	#N/A	#N/A	#N/A	#N/A	#N/A	#N/A
370	0	0	0	Erwinia billingiae strain CIBCM-Mg-115 16S ribosomal RNA gene, partial sequence	#N/A	TGTCAGTATGAGCCCAGGTGGTCGCCTTCGCCACTGGTGTTCCTTCCTATATCTACGCATTTCACCGCTACACAGGAAATTCCACCACCCTCTGCCCTACTCTAGCTTGCCAGTTTTGGATGCAGTTCCCAGGTTGAGCCCGGGGATTTCACATTCAACTTAACAAACCACCTACGCGCGCTTTACGCCCAGTAATTCCGATTAACGCTTGCACCCTCTGTATTACCGCGGCTGCTGGCACAGAGTTAGCCGGTGCTTATTCTGTCGGTAACGTCAAAACAGCAAGGTATTCGCTTACTGCCCTTCCTCCCAACTTAAAGTGCTTTACAATCCGAAGACCTTCTTCACACACGCGGCATGGCTGGATCAGGCTTTCGCCCATTGTCCAATATTCCCCAC…	#N/A	#N/A	#N/A	#N/A	#N/A	#N/A
371	0	0	0	0	#N/A	#N/A	#N/A	#N/A	#N/A	#N/A	#N/A	#N/A
372	2	0	0	0	#N/A	#N/A	#N/A	#N/A	#N/A	#N/A	#N/A	#N/A
373	0	0	0	0	#N/A	#N/A	#N/A	#N/A	#N/A	#N/A	#N/A	#N/A
374	0	0	0	Erwinia billingiae strain CIBCM-Mg-115 16S ribosomal RNA gene, partial sequence	#N/A	TGTCCAGGGGGCCGCCTTCGCCACCGGTRTTCCTCCNNATCTCTACGCATTTCACCGCTACACCTGNAATTCTACCCCCCTCTACNANACTCTAGCCTGCCAGTTTCNAATGCAGTTCCCAGGTTAAGCCCGGGGATTTCACATCTGACTTGACANACCGCCTGCGTGCGCTTTACGCCCAGTAATTCCGATTAACGCTTGCACCCTCCGTATTACCGCGGCTGCTGGCACGGAGTTAGCCGGTGCTTCTTCTGCGGGTAACGTCAATCGANAAGGTTATTAACCTTATCGCCTTCCTCCCCGCTGAAAGTACTTTACAACCCGAAGGCCTTCTTCATACACGCGGCATGGCTGCATCAGGCTTGCGCCCATTGTGCAATATTCCCCACTGCTGCNCCC…	#N/A	#N/A	#N/A	#N/A	#N/A	#N/A
375	0	0	0	0	#N/A	#N/A	#N/A	#N/A	#N/A	#N/A	#N/A	#N/A
376	0	0	0	0	#N/A	#N/A	#N/A	#N/A	#N/A	#N/A	#N/A	#N/A
377	0	0	0	0	#N/A	#N/A	#N/A	#N/A	#N/A	#N/A	#N/A	#N/A
378	0	0	1	Pantoea agglomerans strain CFSAN047153 chromosome, complete genome	TGCCGCGTGTATGAAGAAGGCCTTCGGGTTGTAAAGTACTTTCAGCGGGGAGGAAGGCGATGNGGTTAATAACCSYGTCGATTGACGTTACCCGCAGAAGAAGCACCGGCTAACTCCGTGCCAGCAGCCGCGGTAATACGGAGGGTGCAAGCGTTAATCGGAATTACTGGGCGTAAAGCGCACGCAGGCGGTCTGTTAAGTCAGATGTGAAATCCCCGGGCTTAACCTGGGAACTGCATTTGAAACTGGCAGGCTTGAGTCTTGTAGAGGGGGGTAGAATTCCAGGTGTAGCGGTGAAATGCGTAGAGATCTGGAGGAATACCGGTGGCGAAGGCGGCCCCCTGGACAAAGACTGACGCTCAGGTGCGAAAGCGTGGGGAGCAAACAGGATTAGATACN	CGTCAGTCTTTGTCCAGGGGGCCGCCTTCGCCACCGGTATTCCTCCAGATCTCTACGCATTTCACCGCTACACCTGGAATTCTACCCCCCTCTACAAGACTCAAGCCTGCCAGTTTCAAATGCAGTTCCCAGGTTAAGCCCGGGGATTTCACATCTGACTTAACAGACCGCCTGCGTGCGCTTTACGCCCAGTAATTCCGATTAACGCTTGCACCCTCCGTATTACCGCGGCTGCTGGCACGGAGTTAGCCGGTGCTTCTTCTGCGGGTAACGTCAATCGACGNGGTTATTAACCNCATCGCCTTCCTCCCCGCTGAAAGTACTTTACAACCCGAAGGCCTTCTTCATACACGCGGCATGGCTGCATCAGGCTTGCGCCCATTGTGCAATATTCCCCAC…	TCTCCGGCGGCCTGCACGGCGTGGGCGTCTCCGTGGTTAACGCCCTGTCGCAGAAGCTGGAGCTGACCATTCGTCGCGAAGGCAAAGTGCATCAGCAGATTTACGTCCATGGCGTACCGCAGGCACCGCTGGCGGTGACGGGTGAGACCGACATTACAGGGACCCGTGTGCGTTTCTGGCCGAGCCACGAAACCTTTACCAACGTGCGCGATTTTGAGTATGACATCCTGGCGAAACGCCTGCGTGAACTCTCATTCCTGAACTCCGGCGTGTCGATTCGTCTGGATGATAAGCGTGATGGCAAAAGCGATCACTTCCACTATGAAGGCGGCATCCGGGCGTTTGTTGAGTACCTCAACAAAAACAAAACCCCGATTCACCCTACCGTGTTCTATTTCT…	GATAGCGCAGCTTGTCCGGGTTGTACTCGTCGCGACCAATACCGCAGCCCAGCGCGGTGATCAGCGTGGCCACTTCCTGGGAGGCGAGCATCTTGTCGAAACGCGCTTTCTCAACGTTAAGAATCTTACCTTTCAGCGGCAGAATCGCCTGGTTTTTACGGTTACGGCCCTGTTTGGCCGAGCCGCCKGCTGAGTCACCCTCCACCAGGTAGATTTCAGACAGCGCCGGGTCGCGCTCCTGGCAATCTGCCAGTTTGCCTGGCAGACCCGCCAGGTCCAGCGCGCCTTTACGGCGAGTCATTTCACGGGCGCGGCGTGCCGCTTCACGGGCACGGGCAGCGTCGATGATTTTGCCGACTACAATTTTGGCGTCTGAAGGATTTTCCAGCAGGTATTCAG…	#N/A	#N/A	#N/A	#N/A
379	1	0	1	Pantoea agglomerans strain CFSAN047153 chromosome, complete genome	ATGCCGCGTGTATGAAGAAGGCCTTCGGGTTGTAAAGTACTTTCAGCGGGGAGGAAGGCGATGNGGTTAATAACCSYGTCGATTGACGTTACCCGCAGAAGAAGCACCGGCTAACTCCGTGCCAGCAGCCGCGGTAATACGGAGGGTGCAAGCGTTAATCGGAATTACTGGGCGTAAAGCGCACGCAGGCGGTCTGTTAAGTCAGATGTGAAATCCCCGGGCTTAACCTGGGAACTGCATTTGAAACTGGCAGGCTTGAGTCTTGTAGAGGGGGGTAGAATTCCAGGTGTAGCGGTGAAATGCGTAGAGATCTGGAGGAATACCGGTGGCGAAGGCGGCCCCCTGGACAAAGACTGACGCTCAGGTGCGAAAGCGTGGGGAGCAAACAGGATTAGATAC…	CGTCAGTCTTTGTCCAGGGGGCCGCCTTCGCCACCGGTATTCCTCCAGATCTCTACGCATTTCACCGCTACACCTGGAATTCTACCCCCCTCTACAAGACTCAAGCCTGCCAGTTTCAAATGCAGTTCCCAGGTTAAGCCCGGGGATTTCACATCTGACTTAACAGACCGCCTGCGTGCGCTTTACGCCCAGTAATTCCGATTAACGCTTGCACCCTCCGTATTACCGCGGCTGCTGGCACGGAGTTAGCCGGTGCTTCTTCTGCGGGTAACGTCAATCGACGNGGTTATTAACCNCATCGCCTTCCTCCCCGCTGAAAGTACTTTACAACCCGAAGGCCTTCTTCATACACGCGGCATGGCTGCATCAGGCTTGCGCCCATTGTGCAATATTCCCCAC…	ANTCTCCGGCGGCCTGCACGGCGTGGGCGTCTCCGTGGTTAACGCCCTGTCGCAGAAGCTGGAGCTGACCATTCGTCGCGAAGGCAAAGTGCATCAGCAGATTTACGTCCATGGCGTACCGCAGGCACCGCTGGCGGTGACGGGTGAGACCGACATTACAGGGACCCGTGTGCGTTTCTGGCCGAGCCACGAAACCTTTACCAACGTGCGCGATTTTGAGTATGACATCCTGGCGAAACGCCTGCGTGAACTCTCATTCCTGAACTCCGGCGTGTCGATTCGTCTGGATGATAAGCGTGATGGCAAAAGCGATCACTTCCACTATGAAGGCGGCATCCGGGCGTTTGTTGAGTACCTCAACAAAAACAAAACCCCGATTCACCCTACCGTGTTCTATTT…	GCGCAGCTTGTCCGGGTTGTACTCGTCGCGACCAATACCGCAGCCCAGCGCGGTGATCAGCGTGGCCACTTCCTGGGAGGCGAGCATCTTGTCGAAACGCGCTTTCTCAACGTTAAGAATCTTACCTTTCAGCGGCAGAATCGCCTGGTTTTTACGGTTACGGCCCTGTTTGGCCGAGCCGCCTGCTGAGTCACCCTCCACCAGGTAGATTTCAGACAGCGCCGGGTCGCGCTCCTGGCAATCTGCCAGTTTGCCTGGCAGACCCGCCAGGTCCAGCGCGCCTTTACGGCGAGTCATTTCACGGGCGCGGCGTGCCGCTTCACGGGCACGGGCAGCGTCGATGATTTTGCCGACTACAATTTTGGCGTCTGAAGGATTTTCCAGCAGGTATTCAGCCAG…	#N/A	#N/A	#N/A	#N/A
380	0	0	0	Erwinia billingiae strain CIBCM-Mg-115 16S ribosomal RNA gene, partial sequence	#N/A	CAGTCTTTGTCCAGGGGGCCGCCTTCGCCACCGGTATTCCTCCAGATCTCTACGCATTTCACCGCTACACCTGGAATTCTACCCCCCTCTACAAGACTCTAGCCTGCCAGTTTCAAATGCAGTTCCCAGGTTAAGCCCGGGGATTTCACATCTGACTTGACAGACCGCCTGCGTGCGCTTTACGCCCAGTAATTCCGATTAACGCTTGCACCCTCCGTATTACCGCGGCTGCTGGCACGGAGTTAGCCGGTGCTTCTTCTGCGGGTAACGTCAATCGANAAGGTTATTAACCTTATCGCCTTCCTCCCCGCTGAAAGTACTTTACAACCCGAAGGCCTTCTTCATACACGCGGCATGGCTGCATCAGGCTTGCGCCCATTGTGCAATATTCCCCACTGC…	#N/A	#N/A	#N/A	#N/A	#N/A	#N/A
381	0	0	0	Erwinia billingiae strain CIBCM-Mg-115 16S ribosomal RNA gene, partial sequence	#N/A	CAGTCTTTGTCCAGGGGGCCGCCTTCGCCACCGGTATTCCTCCAGATCTCTACGCATTTCACCGCTACACCTGGAATTCTACCCCCCTCTACAAGACTCTAGCCTGCCAGTTTCAAATGCAGTTCCCAGGTTAAGCCCGGGGATTTCACATCTGACTTGACARACCGCCTGCGTGCGCTTTACGCCCAGTAATTCCGATTAACGCTTGCACCCTCCGTATTACCGCGGCTGCTGGCACGGAGTTAGCCGGTGCTTCTTCTGCGGGTAACGTCAATCGANAAGGTTATTAACCTTATCGCCTTCCTCCCCGCTGAAAGTACTTTACAACCCGAAGGCCTTCTTCATACACGCGGCATGGCTGCATCAGGCTTGCGCCCATTGTGCAATATTCCCCACTGC…	#N/A	#N/A	#N/A	#N/A	#N/A	#N/A
382	0	0	0	Staphylococcus hominis subsp. novobiosepticus strain 4260 16S ribosomal RNA gene, partial sequence	#N/A	AGCGTCAGTTACAGACCAGAAAGTCGCCTTCGCCACTGGTGTTCCTCCATATCTCTGCGCATTTCACCGCTACACATGGAATTCCACTTTCCTCTTCTGCACTCAAGTTTTCCAGTTTCCAATGACCCTCCACGGTTGAGCCGTGGGCTTTCACATCAGACTTAAAAAACCGCCTACGCGCGCTTTACGCCCAATAATTCCGGATAACGCTTGCCACCTACGTATTACCGCGGCTGCTGGCACGTAGTTAGCCGTGGCTTTCTGATTAGGTACCGTCAAGACGTGCACAGTTACTTACACGTTTGTTCTTCCCTAATAACAGAGTTTTACGATCCGAAGACCTTCATCACTCACGCGGCGTTGCTCCGTCAGGCTTTCGCCCATTGCGGAAGATTCCCT…	#N/A	#N/A	#N/A	#N/A	#N/A	#N/A
383	0	0	0	0	#N/A	#N/A	#N/A	#N/A	#N/A	#N/A	#N/A	#N/A
384	0	0	0	0	#N/A	#N/A	#N/A	#N/A	#N/A	#N/A	#N/A	#N/A
385	0	1	0	0	#N/A	#N/A	#N/A	#N/A	#N/A	#N/A	#N/A	#N/A
386	0	2	0	0	#N/A	#N/A	#N/A	#N/A	#N/A	#N/A	#N/A	#N/A
387	0	0	0	Sodalis sp. strain Bb-Pol-5 16S ribosomal RNA gene, partial sequence	#N/A	GCGTCAGTCTTCGTCCAGGGGGCCGCCTTCGCCACCGGTATTCCTCCAGATCTCTACGCATTTCACCGCTACACCTGGAATTCTACCCCCCTCTACGAGACTCTAGCTTGCCAGTTTCAAATGCAGTTCCCGAGTTAAGCTCGGGGATTTCACATCTGACTTAACAAACCGCCTGCGTACGCTTTACGCCCAGTAATTCCGATTAACGCTCGCACCCTCCGTATTACCGCGGCTGCTGGCACGGAGTTAGCCGGTGCTTCTTCTGCGGGTAACGTCAATCAACAAGGTTATTAACCTTRTTGCCTTCCTCCCCGCTGAAAGTGCTTTACAACCCGAAGGCCTTCTTCACACACGCGGCATGGCTGCATCAGGCTTGCGCCCATTGTGCAATATTCCCCA…	#N/A	#N/A	#N/A	#N/A	#N/A	#N/A
388	0	0	0	0	#N/A	#N/A	#N/A	#N/A	#N/A	#N/A	#N/A	#N/A
389	0	0	0	Mucilaginibacter sp. strain YFlour_31 16S ribosomal RNA gene, partial sequence	#N/A	GCGTCATCACACTTTAGTAAGCTGCCTTCGCAATTGGTGTTCTGTGACATATCTATGCATTTCACCGCTACTTGTCACATTCCGCCTACCTCAAGTGTATTCAAGCTCTTCAGTATCAAAGGCACTGCGATAGTTGAGCTACCGTCTTTCACCCCTGACTTAAAAAGCCGCCTACGCACCCTTTAAACCCAATAAATCCGGATAACGCTCGGATCCTCCGTATTACCGCGGCTGCTGGCACGGAGTTAGCCGATCCTTATTCTTACCGTACATTCAGCTTGATTCACGAATCAAGGTTTATTCCGGTACAAAAGCAGTTTACAACCCGTAGGGCCGTCTTCCTGCACGCGGCATGGCTGGTTCAGGCTTCCGCCCATTGACCAATATTCCTTACTGCTG…	#N/A	#N/A	#N/A	#N/A	#N/A	#N/A
390	2	0	0	0	#N/A	#N/A	#N/A	#N/A	#N/A	#N/A	#N/A	#N/A
391	0	0	0	0	#N/A	#N/A	#N/A	#N/A	#N/A	#N/A	#N/A	#N/A
392	0	0	0	Rosenbergiella nectarea strain ST23 16S ribosomal RNA gene, partial sequence	#N/A	GCGTCAGTCTTTGTCCAGGGGGCCGCCTTCGCCACCGGTATTCCTCCAGATCTCTACGCATTTCACCGCTACACCTGGAATTCTACCCCCCTCTACAAGACTCAAGCTTGCCAGTTTCAAATGCAGTTCCCAGGTTGAGCCCGGGGATTTCACATCTGACTTAACAAACCGCCTGCGTGCGCTTTACGCCCAGTAATTCCGATTAACGCTTGCACCCTCCGTATTACCGCGGCTGCTGGCACGGAGTTAGCCGGTGCTTCTTCTGTCAGTAACGTCAATGCATGAAAGTATTAATTTCACACCCTTCCTCCTGACTGAAAGTACTTTACAACCCGAAGGCCTTCTTCATACACGCGGCATGGCTGCATCAGGCTTGCGCCCATTGTGCAATATTCCCCA…	#N/A	#N/A	#N/A	#N/A	#N/A	#N/A
393	0	0	0	Micrococcus sp. strain 1_2_R2A_6B 16S ribosomal RNA gene, partial sequence	#N/A	TTACAGCCCAGAGACCTGCCTTCGCCATCGGTGTTCCTCCTGATATCTGCGCATTCCACCGCTACACCAGGAATTCCAGTCTCCCCTACTGCACTCTAGTCTGCCCGTACCCACCGCAGATCCGGGGTTAAGCCCCGGACTTTCACGACAGACGCGACAAACCGCCTACGAGCTCTTTACGCCCAATAATTCCGGATAACGCTCGCACCCTACGTATTACCGCGGCTGCTGGCACGTAGTTAGCCGGTGCTTCTTCTGCAGGTACCGTCACTTTCGCTTCTTCCCTACTGAAAGAGGTTTACAACCCGAAGGCCGTCATCCCTCACGCGGCGTCGCTGCATCAGGCTTKCGCCCATTGTGCAATATTCCCCACTGCTGN	#N/A	#N/A	#N/A	#N/A	#N/A	#N/A
394	0	0	0	0	#N/A	#N/A	#N/A	#N/A	#N/A	#N/A	#N/A	#N/A
395	0	0	0	0	#N/A	#N/A	#N/A	#N/A	#N/A	#N/A	#N/A	#N/A
396	0	0	0	Serratia sp. M47C12B1 from Portugal 16S ribosomal RNA gene, partial sequence	#N/A	CGTCAGTCTTCGTCCAGGGGGCCGCCTTCGCCACCGGTATTCCTCCAGATCTCTACGCATTTCACCGCTACACCTGGAATTCTACCCCCCTCTACGAGACTCTAGCTTGCCAGTTTCAAATGCAGTTCCCGAGTTAAGCTCGGGGATTTCACATCTGACTTAACAAACCGCCTGCGTACGCTTTACGCCCAGTAATTCCGATTAACGCTCGCACCCTCCGTATTACCGCGGCTGCTGGCACGGAGTTAGCCGGTGCTTCTTCTGCGGGTAACGTCAATCAACAAGGTTATTAACCTTRTTGCCTTCCTCCCCGCTGAAAGTGCTTTACAACCCGAAGGCCTTCTTCACACACGCGGCATGGCTGCATCAGGCTTGCGCCCATTGTGCAATATTCCCCAC…	#N/A	#N/A	#N/A	#N/A	#N/A	#N/A
397	0	0	0	Methylobacterium sp. BA-264 gene for 16S ribosomal RNA, partial sequence	#N/A	GTAATGGTCCAGTTGGCCGCCTTCGCCACCGGTGTTCTTGCGAATATCTACGAATTTCACCTCTACACTCGCAGTTCCACCAACCTCTACCATACTCAAGCCAAACAGTATCGAAGGCAATTCTGTGGTTGAGCCACAGGCTTTCACCCCCGACTTGAATGGCCGCCTACGCGCCCTTTACGCCCAGTGATTCCGAGCAACGCTAGCCCCCTTCGTATTACCGCGGCTGCTGGCACGAAGTTAGCCGGGGCTTATTCTTCCGGTACCGTCATTATCGTCCCGGACAAAAGAGCTTTACAACCCTAAGGCCTTCATCACTCACGCGGCATGGCTGGATCAGGCTTGCGCCCATTGTCCAATATTCCCCACTGCTGN	#N/A	#N/A	#N/A	#N/A	#N/A	#N/A
398	0	0	0	0	#N/A	#N/A	#N/A	#N/A	#N/A	#N/A	#N/A	#N/A
399	0	0	0	0	#N/A	#N/A	#N/A	#N/A	#N/A	#N/A	#N/A	#N/A
400	0	0	0	0	#N/A	GTAATGGTCCAGTTGGCCGCCTTCGCCACCGGTGTTCTTGCGAATATCTACGAATTTCACCTCTACACTCGCAGTTCCACCAACCTCTACCATACTCAAGCCAAACAGTATCGAAGGCAATTCTGTGGTTGAGCCACAGGCTTTCACCCCCGACTTGAATGGCCGCCTACGCGCCCTTTACGCCCAGTGATTCCGAGCAACGCTAGCCCCCTTCGTATTACCGCGGCTGCTGGCACGAAGTTAGCCGGGGCTTATTCTTCCGGTACCGTCATTATCGTCCCGGACAAAAGAGCTTTACAACCCTAAGGCCTTCATCACTCACGCGGCATGGCTGGATCAGGCTTGCGCCCATTGTCCAATATTCCCCACTGCTGN	#N/A	#N/A	#N/A	#N/A	#N/A	#N/A
401	0	0	0	0	#N/A	#N/A	#N/A	#N/A	#N/A	#N/A	#N/A	#N/A
402	0	0	0	Methylobacterium sp. BA-264 gene for 16S ribosomal RNA, partial sequence	#N/A	AGTAATGGTCCAGTTGGCCGCCTTCGCCACCGGTGTTCTTGCGAATATCTACGAATTTCACCTCTACACTCGCAGTTCCACCAACCTCTACCATACTCAAGCCAAACAGTATCGAAGGCAATTCTGTGGTTGAGCCACAGGCTTTCACCCCCGACTTGAATGGCCGCCTACGCGCCCTTTACGCCCAGTGATTCCGAGCAACGCTAGCCCCCTTCGTATTACCGCGGCTGCTGGCACGAAGTTAGCCGGGGCTTATTCTTCCGGTACCGTCATTATCGTCCCGGACAAAAGAGCTTTACAACCCTAAGGCCTTCATCACTCACGCGGCATGGCTGGATCAGGCTTGCGCCCATTGTCCAATATTCCCCACTGCTGN	#N/A	#N/A	#N/A	#N/A	#N/A	#N/A
403	0	0	0	Methylobacterium sp. BA-264 gene for 16S ribosomal RNA, partial sequence	#N/A	CGTCAGTAATGGTCCAGTTGGCCGCCTTCGCCACCGGTGTTCTTGCGAATATCTACGAATTTCACCTCTACACTCGCAGTTCCACCAACCTCTACCATACTCAAGCCAAACAGTATCGAAGGCAATTCTGTGGTTGAGCCACAGGCTTTCACCCCCGACTTGAATGGCCGCCTACGCGCCCTTTACGCCCAGTGATTCCGAGCAACGCTAGCCCCCTTCGTATTACCGCGGCTGCTGGCACGAAGTTAGCCGGGGCTTATTCTTCCGGTACCGTCATTATCGTCCCGGACAAAANAGCTTTACAACCCTAAGGCCTTCATCACTCACGCGGCATGGCTGGATCAGGCTTGCGCCCATTGTCCAATATTCCCCACTGCTGN	#N/A	#N/A	#N/A	#N/A	#N/A	#N/A
404	0	0	0	0	#N/A	TGGTCCAGTTGGCCGCCTTCGCCACCGGTGTTCTTGCGAATATCTACGAATTTCACCTCTACACTCGCAGTTCCACCAACCTCTACCATACTCAAGCCAAACAGTATCGAAGGCAATTCNGTGGTTGAGCCNCAGGCTTTCACCCCCGACTTGAATGGCCGCCTACGCGCCCTTTACGCCCAGTGATTCCGAGCAACGCTAGCCCCCTTCGTATTACCGCGGCTGCTGGCACGAAGTTAGCCGGGGCTTATTCTTCCGGTACCGTCATTATCGTCCCGGACAAAAGAGCTTTACAACCCTAAGGCCTTCATCACTCACGCGGCATGGCTGGATCAGGCTTGCGCCCATTGNCCAATATTCCCCACTGCTG	#N/A	#N/A	#N/A	#N/A	#N/A	#N/A
405	0	0	0	0	#N/A	#N/A	#N/A	#N/A	#N/A	#N/A	#N/A	#N/A
406	2	1	0	Enterobacter hormaechei strain SRU4.4 chromosome	#N/A	CAGTCTTTGTCCAGGGGGCCGCCTTCGCCACCGGTNTTCCTCCAGATCTCTACGCATTTCACCGCTACACCTGGAATTCNACCCCCCTCTACAAGACTCTAGCCTGCCAGTTTCAAATGCAGTTCCCAGGTTAAGCCCGGGGATTTCACATCTGACTTGACANACCGCCTGCGNGCGCTTTACGCCCAGTAATTCCGANTAACGCTTGCACCCTCCGTATTACCGCGGCTGCTGGCACGGAGTTAGCCGGTGCTTCTTCTGCGGGTAACGTCAATCGANAAGGTTATTAACCTTATCGCCTTCCTCCCCGCTGAAAGTACTTTACAACCCGAAGGCCTTCTTCATACACGCGGCANGGCTGCATCAGGCTTGCGCCCATTGTGCAATATTCCCCACTGC…	#N/A	#N/A	#N/A	#N/A	#N/A	#N/A
407	2	0	0	Enterobacter hormaechei strain SRU4.4 chromosome	#N/A	GGNCGCCTTCGCCACNGGTNTTCCTYCNNATMTCTACGCATTTCACCGCTACACMKGRAATTCYACCCCCCTCTACNANACTCTAGNCTGCCAGTTTYRAATGCAGTTCCCAGGTTNAGCCCGGGGATTTCACATCNGACTTRACARACCNCCTGCGNGCGCTTTACGCCCAGTAATTCCGATTAACGCTTGCACCCTCYGTATTACCGCGGCTGCTGGCACNGAGTTAGCCGGTGCTTNTTCTGNNGGTAACGTCAANNNACAAGGTTATTAANCTNATNNCCTTCCTCCCCGCTGAAAGTNCTTTACAACCCGAAGGCCTTCTTCATACACGCGGCATGGCTGNATCAGGCT	#N/A	#N/A	#N/A	#N/A	#N/A	#N/A
408	0	0	0	0	#N/A	#N/A	#N/A	#N/A	#N/A	#N/A	#N/A	#N/A
409	0	0	0	Gamma proteobacterium 5.1.11_I 16S ribosomal RNA gene, partial sequence	#N/A	GGNGGNCGCCTTCGCCACNGGTNTTCCTNCNNATNTCTACGCATTTCACCGCTACACMKGNAATTCNACCMCCCTCTACNANACTCTAGNCNGNCAGTTTYNAATGCAGTTCCCAGGTTNAGCCCGGGGATTTCACATCNRACTTRACARACCRCCTGCGNGCGCTTTACGCCCAGTAATTCCGATTAACGCTTGCACCCTCNGTATTACCGCGGCTGCTGGCACNGAGTTAGCCGGTGCTTATTCTGNNGGTAACGTCAAAACAATAGGTTATTAAGCTTATGCCCTTCCTCCCCGCTTAAAGTGCTTTACAANCCGAAGACCTTCTTCANACACGCGGCATGGCTGNATCAGGCTT	#N/A	#N/A	#N/A	#N/A	#N/A	#N/A
410	1	0	0	0	#N/A	#N/A	#N/A	#N/A	#N/A	#N/A	#N/A	#N/A
411	0	0	0	0	#N/A	#N/A	#N/A	#N/A	#N/A	#N/A	#N/A	#N/A
412	0	0	0	Pseudomonas graminis strain PgKB30 chromosome, complete genome	#N/A	AGTATGAGCCCAGGTGGTCGCCTTCGCCACTGGTGTTCCTTCCTATATCTACGCATTTCACCGCTACACAGGAAATTCCACCACCCTCTGCCCTACTCTAGCTTGCCAGTTTTGGATGCAGTTCCCAGGTTGAGCCCGGGGATTTCACATTCAACTTAACAAACCACCTACGCGCGCTTTACGCCCAGTAATTCCGATTAACGCTTGCACCCTCTGTATTACCGCGGCTGCTGGCACAGAGTTAGCCGGTGCTTATTCTGTCGGTAACGTCAAAACAGCAAGGTATTCGCTTACTGCCCTTCCTCCCAACTTAAAGTGCTTTACAATCCGAAGACCTTCTTCACACACGCGGCATGGCTGGATCAGGCTTTCGCCCATTGTCCAATATTCCCCACTGCT…	#N/A	#N/A	#N/A	#N/A	#N/A	#N/A
413	0	0	0	0	#N/A	#N/A	#N/A	#N/A	#N/A	#N/A	#N/A	#N/A
414	0	0	0	0	#N/A	#N/A	#N/A	#N/A	#N/A	#N/A	#N/A	#N/A
415	0	0	0	Bacillus sp. RM117 16S ribosomal RNA gene, partial sequence	#N/A	CAGACCAGAAAGTCGCCTTCGCCACTGGTGTTCCTCCAAATCTCTACGCATTTCACCGCTACNCTTGGAATTCCACTTTCCTCTTCTGCACTCAAGTTCCCCAGTTTCCAATGACCCTCCACGGTTGAGCCGNGGGCTTTCACATCAGACTTAAGGAACCACCTGCGCGCGCTTTACGCCCAATAATTCCGGACAACGCTTGCCACCTACGTATTACCGCGGCTGCTGGCACGTAGTTAGCCGTGGCTTTNTGGTTAGGTACCGTCAAGGTACCAGCAGTTACTCTGGTACTTGTTCTTCCCTAACAACAGAACTTTACGACCCGAAGGCCTTCTTCGTTCACGCGGCGTNGCTCCGTCAGACTTTCGTCCATTGCGGAAGATTCCCTACTGCTGCNCC…	#N/A	#N/A	#N/A	#N/A	#N/A	#N/A
416	2	0	0	Bacillus licheniformis strain EMB BAC3 16S ribosomal RNA gene, partial sequence	#N/A	NNNAGCGTCAGTTACAGACCAGAGAGTCGCCTTCGCCACTGGTGTTCCTCCACATCTCTACGCATTTCACCGCTACACGTGGAATTCCACTCTCCTCTTCTGCACTCAAGTTCCCCAGTTTCCAATGACCCTCCCCGGTTGAGCCGGGGGCTTTCACATCAGACTTAAGAAACCGCCTGCGCGCGCTTTACGCCCAATAATTCCGGACAACGCTTGCCACCTACGTATTACCGCGGCTGCTGGCACGTAGTTAGCCGTGGCTTTCTGGTTAGGTACCGTCAAGGTRCCGCCCTATTCGAACGGTACTTGTTCTTCCCTAACAACAGAGTTTTACGATCCGAAAACCTTCATCACTCACGCGGCGTTGCTCCGTCAGACTTTCGTCCATTGCGGAAGATT…	#N/A	#N/A	#N/A	#N/A	#N/A	#N/A
417	0	0	0	0	#N/A	#N/A	#N/A	#N/A	#N/A	#N/A	#N/A	#N/A
418	0	0	0	Curtobacterium oceanosedimentum strain DUCC11111 16S ribosomal RNA gene, partial sequence	#N/A	GCGTCAGTTACGGCCCAGAGATCTGCCTTCGCCATCGGTGTTCCTCCTGATATCTGCGCATTCCACCGCTACACCAGGAATTCCAATCTCCCCTACCGCACTCTAGTYTGCCCGTACCCACTGCAAGCCCGAGGTTGAGCCTCGGGATTTCACAGCAGACGCGACAAACCGCCTACGAGCTCTTTACGCCCAATAATTCCGGACAACGCTTGCACCCTACGTATTACCGCGGCTGCTGGCACGTAGTTAGCCGGTGCTTTTTCTGCAGGTACCGTCACTTTCGCTTCTTCCCTACTAAAAGAGGTTTACAACCCGAAGGCCGTCATCCCTCACGCGGCGTTGCTGCATCAGGCTTTCGCCCATTGTGCAATATTCCCCACTGCTGA	#N/A	#N/A	#N/A	#N/A	#N/A	#N/A
419	0	0	0	0	#N/A	#N/A	#N/A	#N/A	#N/A	#N/A	#N/A	#N/A
420	0	0	0	0	#N/A	#N/A	#N/A	#N/A	#N/A	#N/A	#N/A	#N/A
421	0	0	0	Bacillus velezensis strain AB230 16S ribosomal RNA gene, partial sequence	#N/A	GTCAGTTACAGACCAGAGAGTCGCCTTCGCCACTGGTGTTCCTCCACATCTCTACGCATTTCACCGCTACACGTGGAATTCCACTCTCCTCTTCTGCACTCAAGTTCCCCAGTTTCCAATGACCCTCCCCGGTTGAGCCGGGGGCTTTCACATCAGACTTAAGAAACCGCCTGCGAGCCCTTTACGCCCAATAATTCCGGACAACGCTTGCCACCTACGTATTACCGCGGCTGCTGGCACGTAGTTAGCCGTGGCTTTCTGGTTAGGTACCGTCAAGGTGCCGCCCTATTTGAACGGCACTTGTTCTTCCCTAACAACAGAGCTTTACGATCCGAAAACCTTCATCACTCACGCGGCGTTGCTCCGTCAGACTTTCGTCCATTGCGGAAGATTCCCTAC…	#N/A	#N/A	#N/A	#N/A	#N/A	#N/A
422	2	3	1	Bacillus velezensis strain B268 chromosome, complete genome	GTTGTTNNGGAAGAACANGTGCCGTTCNAATNGGGCGGCACCTTGACGGTACCTANCCNNAANNCCACGGCTAACTACGTGCCANCAGCCGCGGTAATACGTAGGTGGCAAGCGTTGTCCGGAATTATTGGGCGTAAAGGGCTCGCANGCGGTTTCTTAANTCTGATGTGAAAGCCCCCGGCTCAACCGGGGAGGGTCATTGGAAACTGGGGAACTTGAGTGCAGAAAAGGAGAGTGGAATTCCACGTGTAGCGGTGAAATGCGTANAGATGTGGAGGAACACCANTGGCGAAGGCGACTCTCTGGTCTGTAACTGACGCTGAGGAGCGAAAGCGTGGGGAGCGAACAGGATTAGATACCC	CTCAGCGTCAGTTACAGACCAGAGAGTCGCCTTCGCCACTGGTGTTCCTCCACATCTCTACGCATTTCACCGCTACACGTGGAATTCCACTCTCCTCTTCTGCACTCAAGTTCCCCAGTTTCCAATGACCCTCCCCGGTTGAGCCGGGGGCTTTCACATCAGACTTAARAAACCGCCTGCGAGCCCTTTACGCCCAATAATTCCGGACAACGCTTGCCACCTACGTATTACCGCGGCTGCTGGCACGTAGTTAGCCGTGGCTTTCTGGTTAGGTACCGTCAAGGTGCCGCCCTATTTGAACGGCACTTGTTCTTCCCTAACAACAGAGCTTTACGATCCGAAAACCTTCATCACTCACGCGGCGTTGCTCCGTCAGACTTTCGTCCATTGCGGAAGATT…	CCGGCGGTCTTCACGGTGTAGGGGCATCCGTCGTAAACGCCTTGTCGACCACTCTTGACGTTACGGTTCATCGTGACGGAAAAATCCATTATCAGGCGTACGAGCGCGGTGTACCTGTGGCCGATCTTGAAGTGATCGGCGAAACTGATAAGACCGGAACGATTACGCACTTCGTTCCGGACCCGGAAATTTTCAAAGAAACAACTGTATATGACTATGATCTGCTTTCAAACCGTGTCCGGGAATTGGCCTTCCTGACAAAAGGCGTAAACATCACGATTGAAGACAAACGTGAAGGACAAGAACGGAAAAACGAGTACCACTACGAAGGCGGAATCAAAAGCTATGTTGAGTACTTAAACCGTTCCAAAGAAGTCGTTCATGAAGAGCCGATTTATA…	NATTAAAATCTTCTCCRAWTCCTGTTCCGAGGGCCGTGATCATTGATCTGACCTCATTGTTTGAGAGAATCTTATCAAGTCTGGCTTTCTCAACGTTCAGAATCTTACCGCGCAGCGGCAGAATGGCTTGGAAATGACGGTCCCGTCCCTGTTTCGCTGATCCGCCCGCAGAGTCACCCTCTACGATATACAGCTCGGAAATGCTCGGATCTTTAGAAGAACAGTCCGCCAGTTTGCCCGGCAGATTGGAAATCTCAAGCGCACTTTTGCGCCGGGTCAATTCCCGGGCTTTTTTCGCCGCCATCCGCGCTCTTGCGGCCATTAAACCTTTTTCAACGATTTTGCGGGCTGAGTCCGGATTTTCAAGAAGGAATGTTTCCAGCGCAGAAGAAAACAGCG…	#N/A	TGCAATGCAACTTCAACCGTTATGCCGTCTTTCTCGCCTTCGATATAAATCGGCTCTTCATGAACGACTTCTTTGGAACGGTTTAAGTACTCAACATAGCTTTTGATTCCGCCTTCGTAGNGGTACTCGTTTTTCCGTTCTTGTCCTTCACGTTTGTCTTCAATCGNGATGTTTACNCCTTTTGTCAGGAAGGCCAATTCCCGGACACGGTTTGAAAGCANATCATAGTCATATACAGTTGTTTCTTTGAAAATTTCCGGGTCCGGAACGAAGTGCGTAATCGTTCCGGTCTTATCAGTTTCGCCGATCACTTCAANATCGGCCACAGGTACACCGCGCTCGTACGCCTGATAATGGATTTTTCCGTCACGATGAACCGTAACGTCAANAGNGGTCNAC…	#N/A	#N/A
423	1	0	0	Bacillus aryabhattai strain NIIST B 513 16S ribosomal RNA gene, partial sequence	#N/A	CGTCAGTTACAGACCAAAAAGCCGCCTTCGCCACTGGTGTTCCTCCACATCTCTACGCATTTCACCGCTACACGTGGAATTCCGCTTTTCTCTTCTGCACTCAAGTTCCCCAGTTTCCAATGACCCTCCACGGTTGAGCCGTGGGCTTTCACATCAGACTTAAGAAACCGCCTGCGCGCGCTTTACGCCCAATAATTCCGGATAACGCTTGCCACCTACGTATTACCGCGGCTGCTGGCACGTAGTTAGCCGTGGCTTTCTGGTTAGGTACCGTCAAGGTACRAGCAGTTACTCTYGTACTTGTTCTTCCCTAACAACAGAGTTTTACGACCCGAAAGCCTTCATCACTCACGCGGCGTTGCTCCGTCAGACTTTCGTCCATTGCGGAAGATTCCCTAC…	#N/A	#N/A	#N/A	#N/A	#N/A	#N/A
424	0	0	0	Priestia sp. strain B176/17 16S ribosomal RNA gene, partial sequence	#N/A	CGTCAGTTACAGACCAAAAAGCCGCCTTCGCCACTGGTGTTCCTCCACATCTCTACGCATTTCACCGCTACACGTGGAATTCCGCTTTTCTCTTCTGCACTCAAGTTCCCCAGTTTCCAATGACCCTCCACGGTTGAGCCGTGGGCTTTCACATCAGACTTAAGAAACCGCCTGCGCGCGCTTTACGCCCAATAATTCCGGATAACGCTTGCCACCTACGTATTACCGCGGCTGCTGGCACGTAGTTAGCCGTGGCTTTCTGGTTAGGTACCGTCAAGGTACNAGCAGTTACTCTCGTACTTGTTCTTCCCTAACAACAGAGTTTTACGACCCGAAAGCCTTCATCACTCACGCGGCGTTGCTCCGTCAGACTTTCGTCCATTGCGGAAGATTCCCTAC…	#N/A	#N/A	#N/A	#N/A	#N/A	#N/A
425	0	0	0	Bacillus altitudinis strain NASRJ3 16S ribosomal RNA gene, partial sequence	#N/A	CGTCAGTTACAGACCAGAGAGTCGCCTTCGCCACTGGTGTTCCTCCACATCTCTACGCATTTCACCGCTACACGTGGAATTCCACTCTCCTCTTCTGCACTCAAGTTTCCCAGTTTCCAATGACCCTCCCCGGTTGAGCCGGGGGCTTTCACATCAGACTTAAGAAACCGCCTGCGAGCCCTTTACGCCCAATAATTCCGGACAACGCTTGCCACCTACGTATTACCGCGGCTGCTGGCACGTAGTTAGCCGTGGCTTTCTGGTTAGGTACCGTCAAGGTGCAAGCAGTTACTCTTGCACTTGTTCTTCCCTAACAACAGAGCTTTACGATCCGAAAACCTTCATCACTCACGCGGCGTTGCTCCGTCAGACTTTCGTCCATTGCGGAAGATTCCCTAC…	#N/A	#N/A	#N/A	#N/A	#N/A	#N/A
426	0	0	0	Priestia megaterium strain NASRJ6 16S ribosomal RNA gene, partial sequence	#N/A	AGCGTCAGTTACAGACCAAAAAGCCGCCTTCGCCACTGGTGTTCCTCCACATCTCTACGCATTTCACCGCTACACGTGGAATTCCGCTTTTCTCTTCTGCACTCAAGTTCCCCAGTTTCCAATGACCCTCCACGGTTGAGCCGTGGGCTTTCACATCAGACTTAAGAAACCGCCTGCGCGCGCTTTACGCCCAATAATTCCGGATAACGCTTGCCACCTACGTATTACCGCGGCTGCTGGCACGTAGTTAGCCGTGGCTTTCTGGTTAGGTACCGTCAAGGTACAAGCAGTTACTCTTGTACTTGTTCTTCCCTAACAACAGAGTTTTACGACCCGAAAGCCTTCATCACTCACGCGGCGTTGCTCCGTCAGACTTTCGTCCATTGCGGAAGATTCCCT…	#N/A	#N/A	#N/A	#N/A	#N/A	#N/A
427	0	0	0	Bacillus sp. (in: Bacteria) strain 95 16S ribosomal RNA gene, partial sequence	#N/A	AGCGTCAGTTACAGACCAAAAAGCCGCCTTCGCCACTGGTGTTCCTCCACATCTCTACGCATTTCACCGCTACACGTGGAATTCCGCTTTTCTCTTCTGCACTCAAGTTCCCCAGTTTCCAATGACCCTCCACGGTTGAGCCGTGGGCTTTCACATCAGACTTAAGAAACCGCCTGCGCGCGCTTTACGCCCAATAATTCCGGATAACGCTTGCCACCTACGTATTACCGCGGCTGCTGGCACGTAGTTAGCCGTGGCTTTCTGGTTAGGTACCGTCAAGGTACNAGCAGTTACTCTCGTACTTGTTCTTCCCTAACAACAGAGTTTTACGACCCGAAAGCCTTCATCACTCACGCGGCGTTGCTCCGTCAGACTTTCGTCCATTGCGGAAGATTCCCT…	#N/A	#N/A	#N/A	#N/A	#N/A	#N/A
428	0	0	0	Lysinibacillus sp. strain S77a 16S ribosomal RNA gene, partial sequence	#N/A	GTCAGTTACAGACCAGATAGTCGCCTTCGCCACTGGTGTTCCTCCAAATCTCTACGCATTTCACCGCTACACTTGGAATTCCACTATCCTCTTCTGCACTCAAGTTCCCCAGTTTCCAATGACCCTCCACGGTTGAGCCGTGGGCTTTCACATCAGACTTAAGGAACCACCTGCGCGCGCTTTACGCCCAATAATTCCGGACAACGCTTGCCACCTACGTATTACCGCGGCTGCTGGCACGTAGTTAGCCGTGGCTTTCTAATAAGGTACCGTCAAGGTACAGCCAGTTACTACTGTACTTGTTCTTCCCTTACAACAGAGTTTTACGAACCGAAATCCTTCTTCACTCACGCGGCGTTGCTCCATCAGGCTTTCGCCCATTGTGGAAGATTCCCTACT…	#N/A	#N/A	#N/A	#N/A	#N/A	#N/A
429	0	0	0	Bacillus pumilus strain AMS 2 16S ribosomal RNA gene, partial sequence	#N/A	AGCGTCAGTTACAGACCAGAGAGTCGCCTTCGCCACTGGTGTTCCTCCACATCTCTACGCATTTCACCGCTACACGTGGAATTCCACTCTCCTCTTCTGCACTCAAGTTTCCCAGTTTCCAATGACCCTCCCCGGTTGAGCCGGGGGCTTTCACATCAGACTTAAGAAACCGCCTGCGAGCCCTTTACGCCCAATAATTCCGGACAACGCTTGCCACCTACGTATTACCGCGGCTGCTGGCACGTAGTTAGCCGTGGCTTTCTGGTTAGGTACCGTCAAGGTGCGAGCAGTTACTCTCGCACTTGTTCTTCCCTAACAACAGAGCTTTACGATCCGAAAACCTTCATCACTCACGCGGCGTTGCTCCGTCAGACTTTCGTCCATTGCGGAAGATTCCCT…	#N/A	#N/A	#N/A	#N/A	#N/A	#N/A
430	0	0	0	0	#N/A	#N/A	#N/A	#N/A	#N/A	#N/A	#N/A	#N/A
431	0	0	0	Pseudomonas graminis strain P9-48 16S ribosomal RNA gene, partial sequence	#N/A	AGTGTCAGTATGAGCCCAGGTGGTCGCCTTCGCCACTGGTGTTCCTTCCTATATCTACGCATTTCACCGCTACACAGGAAATTCCACCACCCTCTGCCCTACTCTAGCTTGCCAGTTTTGGATGCAGTTCCCAGGTTGAGCCCGGGGATTTCACATTCAACTTAACAAACCACCTACGCGCGCTTTACGCCCAGTAATTCCGATTAACGCTTGCACCCTCTGTATTACCGCGGCTGCTGGCACAGAGTTAGCCGGTGCTTATTCTGTCGGTAACGTCAAAACACTAACGTATTAGGTTAATGCCCTTCCTCCCAACTTAAAGTGCTTTACAATCCTAAGACCTTCTTCACACACGCGGCATGGCTGGATCAGGCTTTCGCCCATTGTCCAATATTCCCC…	#N/A	#N/A	#N/A	#N/A	#N/A	#N/A
432	2	3	1	Bacillus velezensis strain B268 chromosome, complete genome	CGCCGCGTGAGTGATGAAGGTTTTCGGATCGTAAAGCTCTGTTGTTAGGGAAGAACAAGTGCCGTTCAAATAGGGCGGCACCTTGACGGTACCTAACCAGAAAGCCACGGCTAACTACGTGCCAGCAGCCGCGGTAATACGTAGGTGGCAAGCGTTGTCCGGAATTATTGGGCGTAAAGGGCTCGCAGGCGGTTTCTTAAGTCTGATGTGAAAGCCCCCGGCTCAACCGGGGAGGGTCATTGGAAACTGGGGAACTTGAGTGCAGAAGAGGAGAGTGGAATTCCACGTGTAGCGGTGAAATGCGTAGAGATGTGGAGGAACACCAGTGGCGAAGGCGACTCTCTGGTCTGTAACTGACGCTGAGGAGCGAAAGCGTGGGGAGCGAACAGGATTAGATAC…	GTCAGTTACAGACCAGAGAGTCGCCTTCGCCACTGGTGTTCCTCCACATCTCTACGCATTTCACCGCTACACGTGGAATTCCACTCTCCTCTTCTGCACTCAAGTTCCCCAGTTTCCAATGACCCTCCCCGGTTGAGCCGGGGGCTTTCACATCAGACTTAAGAAACCGCCTGCGAGCCCTTTACGCCCAATAATTCCGGACAACGCTTGCCACCTACGTATTACCGCGGCTGCTGGCACGTAGTTAGCCGTGGCTTTCTGGTTAGGTACCGTCAAGGTGCCGCCCTATTTGAACGGCACTTGTTCTTCCCTAACAACAGAGCTTTACGATCCGAAAACCTTCATCACTCACGCGGCGTTGCTCCGTCAGACTTTCGTCCATTGCGGAAGATTCCCTAC…	TACNTATCCGGCGGTCTTCACGGTGTAGGGGCATCCGTCGTAAACGCCTTGTCGACCACTCTTGACGTTACGGTTCATCGTGACGGAAAAATCCATTATCAGGCGTACGAGCGCGGTGTACCTGTGGCCGATCTTGAAGTGATCGGCGAAACTGATAAGACCGGAACGATTACGCACTTCGTTCCGGACCCGGAAATTTTCAAAGAAACAACTGTATATGACTATGATCTGCTTTCAAACCGTGTCCGGGAATTGGCCTTCCTGACAAAAGGCGTAAACATCACGATTGAAGACAAACGTGAAGGACAAGAACGGAAAAACGAGTACCACTACGAAGGCGGAATCAAAAGCTATGTTGAGTACTTAAACCGTTCCAAAGAAGTCGTTCATGAAGAGCCG…	NTGATACGCGCTTTTTCAGATTAAAATCTTCTCCGATTCCKGTTCCGAGGGCCGTGATCATTGATCTGACCTCATTGTTTGAGAGAATCTTATCAAGTCTGGCTTTCTCAACGTTCAGAATCTTACCGCGCAGCGGCAGAATGGCTTGGAAATGACGGTCCCGTCCCTGTTTCGCTGATCCGCCCGCAGAGTCACCCTCTACGATATACAGCTCGGAAATGCTCGGATCTTTAGAAGAACAGTCCGCCAGTTTGCCCGGCAGATTGGAAATCTCAAGCGCACTTTTGCGCCGGGTCAATTCCCGGGCTTTTTTCGCCGCCATCCGCGCTCTTGCGGCCATTAAACCTTTTTCAACGATTTTGCGGGCTGAGTCCGGATTTTCAAGAAGGAATGTTTCCA…	#N/A	ATAGCTGTCGTTGTATTGCAATGCAACTTCAACCGTTATGCCGTCTTTCTCGCCTTCNATATAAATCGGCTCTTCATGAACGACTTCTTTGGAACGGTTTAAGTACTCAACATAGCTTTTGATTCCGCCTTCGTAGTGGTACTCGTTTTTCCGTTCTTGTCCTTCACGTTTGTCTTCAATCGTGATGTTTACNCCTTTTGTCAGGAAGGCCAATTCCCGGACACGGTTTGAAAGCANATCATAGTCATATACAGTTGTTTCTTTGAAAATTTCCGGGTCCGGAACGAAGTGCGTAATCGTTCCGGTCTTATCAGTTTCGCCNATCACTTCAAGATCGGCCACAGGTACACCGCGCTCGTACGCCTGATAATGGATTTTTCCGTCACGATGAACCGTAAC…	#N/A	#N/A
433	0	0	0	Frondihabitans sp. LE-137 gene for 16S ribosomal RNA, partial sequence	#N/A	CAGCGTCAGTTACGGCCCAGAGATCTGCCTTCGCCATCGGTGTTCCTCCTGATATCTGCGCATTCCACCGCTACACCAGGAATTCCAATCTCCCCTACCGCACTCTAGTCTGCCCGTACCCACTGCAGGCTGGGGGTTGAGCCCCCAGATTTCACAGCAGACGCGACAAACCGCCTACGAGCTCTTTACGCCCAATAATTCCGGACAACGCTTGCACCCTACGTATTACCGCGGCTGCTGGCACGTAGTTAGCCGGTGCTTTTTCTGCAGGTACCGTCACTTTCGCTTCTTCCCTACTAAAAGAGGTTTACAACCCGAAGGCCGTCATCCCTCACGCGGCGTTGCTGCATCAGGCTTTCGCCCATTGTGCAATATTCCCCACTGCTGN	#N/A	#N/A	#N/A	#N/A	#N/A	#N/A
434	0	0	0	Sanguibacter keddieii DSM 10542, complete genome	#N/A	GCGTCAGTAGTGGCCCAGTGACCTGCCTTCGCCATCGGTGTTCCTCCTGATATCTGCGCATTCCACCGCTACACCAGGAATTCCAGTCACCCCTACCACACTCTAGTCTGCCCGTACCCGATGCAAGCTCAAGGTTGAGCCTTGAGTTTTCACACCAGACGCGACAAACCGCCTACGAGCTCTTTACGCCCAATAATTCCGGACAACGCTTGCGCCCTACGTATTACCGCGGCTGCTGGCACGTAGTTAGCCGGCGCTTCTTCTGCAGGTACCGTCACTTTCGCTTCTTCCCTACTGAAAGAGGTTTACAACCCGAAGGCCTTCATCCCTCACGCGGCGTCGCTGCATCAGGCTTTCGCCCATTGTGCAATATTCCCCACTGCTGNCCCCGTAGGANTC…	#N/A	#N/A	#N/A	#N/A	#N/A	#N/A
435	0	0	0	0	#N/A	#N/A	#N/A	#N/A	#N/A	#N/A	#N/A	#N/A
436	0	0	0	Paenibacillus seodonensis strain DCT-19 16S ribosomal RNA, partial sequence	#N/A	AGCGTCAGTTACAGCCCAGAGAGTCGCCTTCGCCACTGGTGTTCCTCCACATATCTACGCATTTCACCGCTACACGTGGAATTCCACTCTCCTCTTCTGCACTCAAGTCACCCAGTTTCCAGTGCGATCCGGGGTTGAGCCCCGGGATTAAACACCAGACTTAAATGACCGCCTGCGCGCGCTTTACGCCCAATAATTCCGGACAACGCTTGCCCCCTACGTATTACCGCGGCTGCTGGCACGTAGTTAGCCGGGGCTTTCTTCTCAGGTACCGTCACCTCAGGAGCAGTTACTCTCCTAAGCGTTCTTCCCTGGCAACAGAGCTTTACGATCCGAAAACCTTCATCACTCACGCGGCATTGCTCCGTCAGGCTTTCGCCCATTGCGGAANATTCCCTA…	#N/A	#N/A	#N/A	#N/A	#N/A	#N/A
437	0	0	0	Kocuria rhizophila strain NO4 16S ribosomal RNA gene, partial sequence	#N/A	AGCGTCAGTAACAGCCCAGAGACCTGCCTTCGCCATCGGTGTTCCTCCTGATATCTGCGCATTTCACCGCTACACCAGGAATTCCAGTCTCCCCTACTGCACTCAAGTCTGCCCGTACCCACTGCACACCCGGGGTTAAGCCCCGGGCTTTCACAGCAGACGCGACAAACCGCCTACGAGCTCTTTACGCCCAATAATTCCGGACAACGCTTGCGCCCTACGTATTACCGCGGCTGCTGGCACGTAGTTAGCCGGCGCTTCTTCTGCACGTACCGTCACTTTCGCTTCTTCCGTGCTGAAAGAGGTTTACAACCCGAAGGCCGTCATCCCTCACGCGGCGTCGCTGCATCAGGCTTNCGCCCATTGTGCAATATTCCCCACTGCTGA	#N/A	#N/A	#N/A	#N/A	#N/A	#N/A
438	0	0	0	0	#N/A	#N/A	#N/A	#N/A	#N/A	#N/A	#N/A	#N/A
439	0	0	0	0	#N/A	#N/A	#N/A	#N/A	#N/A	#N/A	#N/A	#N/A
440	0	0	0	Bacillus cereus strain EKCB5 16S ribosomal RNA gene, partial sequence	#N/A	AGTTACAGACCAGAAAGTCGCCTTCGCCACTGGTGTTCCTCCATATCTCTACGCATTTCACCGCTACACATGGAATTCCACTTTCCTCTTCTGCACTCAAGTCTCCCAGTTTCCAATGACCCTCCACGGTTGAGCCGTGGGCTTTCACATCAGACTTAAGAAACCACCTGCGCGCGCTTTACGCCCAATAATTCCGGATAACGCTTGCCACCTACGTATTACCGCGGCTGCTGGCACGTAGTTAGCCGTGGCTTTCTGGTTAGGTACCGTCAAGGTGCCAGCTTATTCAACTAGCACTTGTTCTTCCCTAACAACAGAGTTTTACGACCCGAAAGCCTTCATCACTCACGCGGCGTTGCTCCGTCAGACTTTCGTCCATTGCGGAAGATTCCCTACTGC…	#N/A	#N/A	#N/A	#N/A	#N/A	#N/A
441	0	0	0	Tremella fibulifera voucher sp 211759 small subunit ribosomal RNA gene, partial sequence	#N/A	AATANGNCNTCGCCTTTAGCACTCCCCCTAGTATCATAAGATATCAGCCCTACTCTAGGTATTGTAATTACTTCTATTTGACTCTAGCCATTTTTACGGCCGGCTACGTATCCTTTACACCAATTTAAAACTCCAATGGGTCGCCCTTTCTGTCTTACCGCGTCTGCTGGCACANAGTTTGGACAGGACTTATAGTACTTTGATCATCATTCATAAGTACGACATCTATTTTATTAGAATCTAGGTGACTGGTTCACACGTTTGTGCATTGACCAATATTCTTCACTGCTGCNCCCCGTAGGANCC	#N/A	#N/A	#N/A	#N/A	#N/A	#N/A
442	0	0	0	Microbacterium sp. strain T804 16S ribosomal RNA gene, partial sequence	#N/A	GCGTCAGTTACGGCCCAGAGATCTGCCTTCGCCATCGGTGTTCCTCCTGATATCTGCGCATTCCACCGCTACACCAGGAATTCCAATCTCCCCTACCGCACTCTAGTCTGCCCGTACCCACTGCAGGCCGGAGGTTGAGCCTCCGGATTTCACAGCAGACGCGACAAACCGCCTACGAGCTCTTTACGCCCAATAATTCCGGATAACGCTTGCGCCCTACGTATTACCGCGGCTGCTGGCACGTAGTTAGCCGGCGCTTTTTCTGCAGGTACCGTCACTTTCGCTTCTTCCCTGCTAAAAGAGGTTTACAACCCGAAGGCCGTCATCCCTCACGCGGCGTTGCTGCATCAGGCTTGCGCCCATTGTGCAATATTCCCCACTGCTGN	#N/A	#N/A	#N/A	#N/A	#N/A	#N/A
443	0	0	0	[Brevibacterium] frigoritolerans strain HY34 16S ribosomal RNA gene, partial sequence	#N/A	AGTTACAGACCAGAAAGTCGCCTTCGCCACTGGTGTTCCTCCAAATCTCTACGCATTTCACCGCTACACTTGGAATTCCACTTTCCTCTTCTGCACTCAAGTTCCCCAGTTTCCAATGACCCTCCACGGTTGAGCCGTGGGCTTTCACATCAGACTTAAGGAACCACCTGCGCGCGCTTTACGCCCAATAATTCCGGACAACGCTTGCCACCTACGTATTACCGCGGCTGCTGGCACGTAGTTAGCCGTGGCTTTCTGGTTAGGTACCGTCAAGGTACCAGCAGTTACTCTGGTACTTGTTCTTCCCTAACAACAGAACTTTACGACCCGAAGGCCTTCTTCGTTCACGCGGCGTTGCTCCGTCAGACTTTCGTCCATTGCGGAAGATTCCCTACTGCT…	#N/A	#N/A	#N/A	#N/A	#N/A	#N/A
444	0	0	0	Pseudomonas bohemica strain IA19 16S ribosomal RNA, partial sequence >gi|1254461010|gb|MG190030.1| Pseudomonas bohemica strain IA19 16S ribosomal RNA gene, partial sequence	#N/A	AGTATGAGCCCAGGTGGTCGCCTTCGCCACTGGTGTTCCTTCCTATATCTACGCATTTCACCGCTACACAGGAAATTCCACCACCCTCTGCCCTACTCTAGCCTGCCAGTTTTGGATGCAGTTCCCAGGTTGAGCCCGGGGATTTCACATCCAACTTAACAAACCACCTACGCGCGCTTTACGCCCAGTAATTCCGATTAACGCTTGCACCCTCTGTATTACCGCGGCTGCTGGCACAGAGTTAGCCGGTGCTTATTCTGTCGGTAACGTCAAAACACCAACGTATTAGGTTAATGCCCTTCCTCCCAACTTAAAGTGCTTTACAATCCGAAGACCTTCTTCACACACGCGGCATGGCTGGATCAGGCTTTCGCCCATTGTCCAATATTCCCCACTGCT…	#N/A	#N/A	#N/A	#N/A	#N/A	#N/A
445	0	0	0	0	#N/A	#N/A	#N/A	#N/A	#N/A	#N/A	#N/A	#N/A
446	2	0	0	Bacillus licheniformis strain EN-25 16S ribosomal RNA gene, partial sequence	#N/A	GTTACAGACCAGAGAGTCGCCTTCGCCACTGGTGTTCCTCCACATCTCTACGCATTTCACCGCTACACGTGGAATTCCACTCTCCTCTTCTGCACTCAAGTTCCCCAGTTTCCAATGACCCTCCCCGGTTGAGCCGGGGGCTTTCACATCAGACTTAAGAAACCGCCTGCGCGCGCTTTACGCCCAATAATTCCGGACAACGCTTGCCACCTACGTATTACCGCGGCTGCTGGCACGTAGTTAGCCGTGGCTTTCTGGTTAGGTACCGTCAAGGTACCGCCCTATTCGAACGGTACTTGTTCTTCCCTAACAACAGAGTTTTACGATCCGAAAACCTTCATCACTCACGCGGCGTTGCTCCGTCAGACTTTCGTCCATTGCGGAAGATTCCCTACTGCT…	#N/A	#N/A	#N/A	#N/A	#N/A	#N/A
447	0	0	0	Pseudomonas synxantha strain PLA-28 16S ribosomal RNA gene, partial sequence	#N/A	TTCCTNCNNATNTCTACGCATTTCACCGCTACACNNGRAATTCCACCMCCCTCTACNATACTCTAGNCNGNCAGTTTNNAATGCAGTTCCCAGGTTNAGCCCGGGGATTTCACATCNNACTTNACAAACCNCCTRCGCGCGCTTTACGCCCANTAATTCCGANTAACGCTTGCACCCTCNGTATTACCGCGGCTGCTGGCACNGAGTTAGCCGGTGCTTNTTCTGNNGGTAACGTCAAA	#N/A	#N/A	#N/A	#N/A	#N/A	#N/A
448	0	2	0	0	#N/A	#N/A	#N/A	#N/A	#N/A	#N/A	#N/A	#N/A
449	1	1	0	Bacillus subtilis strain 3 16S ribosomal RNA gene, partial sequence	#N/A	AGTTACAGACCAGAGAGTCGCCTTCGCCACNGGTGTTCCTCCACATCTCTACGCATTTCACCGCTACACGTGGAATTCCACTCTCCTCTTCTGCACTCAAGTTCCCCAGTTTCCAATGACCCTCCCCGGTTGAGCCGGGGGCTTTCACATCANACTTAAGAAACCGCCTGCGAGCCCTTTACGCCCAATAATTCCGGACAACGCTTGCCACCTACGTATTACCGCGGCTGCTGGCACGTAGTTAGCCGTGGCTTTCTGGTTAGGTACCGTCAAGGTACCGCCCTATTCGAACGGTACTTGTTCTTCCCTAACAACAGAGCTTTACGATCCGAAAACCTTCATCACTCACGCGGCGTTGCTCCGTCAGACTTTCGTCCATTGNGGAANATTCCCTACNGC…	#N/A	#N/A	#N/A	#N/A	#N/A	#N/A
450	1	1	0	0	#N/A	#N/A	#N/A	#N/A	#N/A	#N/A	#N/A	#N/A
451	1	0	0	0	#N/A	AGTTACAGACCAGAGAGTCGCCTTCGCCACTGGTGTTCCTCCACATCTCTACGCATTTCACCGCTACACGTGGAATTCCACTCTCCTCTTCTGCACTCAAGTTTCCCAGTTTCCAATGACCCTCCCCGGTTGAGCCGGGGGCTTTCACATCAGACTTAAGAAACCGCCTGCGAGCCCTTTACGCCCAATAATTCCGGACAACGCTTGCCACCTACGTATTACCGCGGCTGCTGGCACGTAGTTAGCCGTGGCTTTCTGGTTAGGTACCGTCAAGGTGCAAGCAGTTACTCTTGCACTTGTTCTTCCCTAACAACAGAGCTTTACGATCCGAAAACCTTCATCACTCACGCGGCGTTGCTCCGTCAGACTTTCGTCCATTGCGGAAGATTCCCTACTGCT…	#N/A	#N/A	#N/A	#N/A	#N/A	#N/A
452	0	0	0	Tremella fibulifera voucher sp 211759 small subunit ribosomal RNA gene, partial sequence	#N/A	GNCKTCGCCTTTAGCACTCCCCCTAGTATCATAAGATATCAGCCCTACTCTAGGTATTGTAATTACTTCTATTTGACTCTAGCCATTTTTACGGCCGGCTACGTATCCTTTACACCAATTTAAAACTCCAATGGGTCGCCCTTTCTGTCTTACCGCGTCTGCTGGCACAGAGTTTGGACAGGACTTATAGTACTTTGATCATTATTCATAAGTACGACATCTATTACTAGAATCTAGGTGACTGGTTCACACGTTTGTGCATTGACCAATATTCTTCACTGCTGCACCCCGTAGGANN	#N/A	#N/A	#N/A	#N/A	#N/A	#N/A
453	0	0	0	Pseudomonas graminis strain PgKB30 chromosome, complete genome	#N/A	TGTCAGTATGAGCCCAGGTGGTCGCCTTCGCCACTGGTGTTCCTTCCTATATCTACGCATTTCACCGCTACACAGGAAATTCCACCACCCTCTGCCCTACTCTAGCTTGCCAGTTTTGGATGCAGTTCCCAGGTTGAGCCCGGGGATTTCACATTCAACTTAACAAACCACCTACGCGCGCTTTACGCCCAGTAATTCCGATTAACGCTTGCACCCTCTGTATTACCGCGGCTGCTGGCACAGAGTTAGCCGGTGCTTATTCTGTCGGTAACGTCAAAACAGCAAGGTATTCGCTTACTGCCCTTCCTCCCAACTTAAAGTGCTTTACAATCCGAAGACCTTCTTCACACACGCGGCATGGCTGGATCAGGCTTTCGCCCATTGTCCAATATTCCCCAC…	#N/A	#N/A	#N/A	#N/A	#N/A	#N/A
454	0	0	0	0	#N/A	#N/A	#N/A	#N/A	#N/A	#N/A	#N/A	#N/A
455	2	0	0	0	#N/A	#N/A	#N/A	#N/A	#N/A	#N/A	#N/A	#N/A
456	2	0	0	0	#N/A	#N/A	#N/A	#N/A	#N/A	#N/A	#N/A	#N/A
457	0	2	0	Pseudomonas lurida strain WL94 16S ribosomal RNA gene, partial sequence	#N/A	AGTATTAGTCCAGGTGGTCGCCTTCGCCACTGGTGTTCCTTCCTATATCTACGCATTTCACCGCTACACAGGAAATTCCACCACCCTCTACCATACTCTAGTCAGTCAGTTTTGAATGCAGTTCCCAGGTTGAGCCCGGGGATTTCACATCCAACWTAACAAACCACCTACGCGCGCTTTACGCCCAGTAATTCCGATTAACGCTTGCACCCTCTGTATTACCGCGGCTGCTGGCACAGAGTTAGCCGGTGCTTATTCTGTCGGTAACGTCAAAACAGTTACGTATTAGGCAACTGCCCTTCCTCCCAACTTAAAGTGCTTTACAATCCGAANACCNTCTTCACACACGCGGCATGGCTGGATCAGGCTTTCGCCCATTGTCCAATATTCCCCACTGCT…	#N/A	#N/A	#N/A	#N/A	#N/A	#N/A
458	0	0	0	Bacillus thuringiensis strain Bc601, complete genome	#N/A	GCNCAGTGTCAGTTACAGACCAGAAAGTCGCCTTCGCCACTGGTGTTCCTCCATATCTCTACGCATTTCACCGCTACACATGGAATTCCACTTTCCTCTTCTGCACTCAAGTCTCCCAGTTTCCAATGACCCTCCACGGTTGAGCCGTGGGCTTTCACATCAGACTTAAGAAACCACCTGCGCGCGCTTTACGCCCAATAATTCCGGATAACGCTTGCCACCTACGTATTACCGCGGCTGCTGGCACGTAGTTAGCCGTGGCTTTCTGGTTAGGTACCGTCAAGGTGCCAGCTTATTCAACTAGCACTTGTTCTTCCCTAACAACAGAGTTTTACGACCCGAAAGCCTTCATCACTCACGCGGCGTTGCTCCGTCAGACTTTCGTCCATTGCGGAAGAT…	#N/A	#N/A	#N/A	#N/A	#N/A	#N/A
459	0	0	0	Sodalis sp. strain Bb-Pol-5 16S ribosomal RNA gene, partial sequence	#N/A	CGTCAGTCTTCGTCCAGGGGGCCGCCTTCGCCACCGGTATTCCTCCAGATCTCTACGCATTTCACCGCTACACCTGGAATTCTACCCCCCTCTACGAGACTCTAGCCTGCCAGTTTCAAATGCAGTTCCCGGGTTAAGCCCGGGGATTTCACATCTGACTTAACAGACCGCCTGCGTACGCTTTACGCCCAGTAATTCCGATTAACGCTCGCACCCTCCGTATTACCGCGGCTGCTGGCACGGAGTTAGCCGGTGCTTCTTCTGCGGGTAACGTCAATCRACAAGGTTATTAACCTTATCGCCTTCCTCCCCGCTGAAAGTGCTTTACAACCCGAAGGCCTTCTTCACACACGCGGCATGGCTGCATCAGGCTTGCGCCCATTGTGCAATATTCCCCAC…	#N/A	#N/A	#N/A	#N/A	#N/A	#N/A
460	0	0	0	Pseudomonas synxantha strain PLA-28 16S ribosomal RNA gene, partial sequence	#N/A	TTCCTNCNNATNTCTACGCATTTCACCGCTACACNKGNAATTCNACCMCCCTCTACMANACTCTAGNCNGNCAGTTTNNAATGCAGTTCCCAGGTTNAGCCCGGGGATTTCACATCNNACTTRACAAACCRCCTRCGNGCGCTTTACGCCCAGTAATTCCGANTAACGCTTGCACCCTCNGTATTACCGCGGCTGCTGGCACNGAGTTAGCCGGTGCTTNTTCTGNNGGTAACGTCAAN	#N/A	#N/A	#N/A	#N/A	#N/A	#N/A
461	0	0	0	Pantoea sp. strain TRSCYN34 16S ribosomal RNA gene, partial sequence	#N/A	GTCAGTCTTTGTCCAGGGGGCCGCCTTCGCCACCGGTRTTCCTCCAGATCTCTACGCATTTCACCGCTACACCTGNAATTCTACCCCCCTCTACAAGACTCAAGCCTGCCAGTTTCAAATGCAGTTCCCAGGTTAAGCCCGGGGATTTCACATCTGACTTAACARACCGCCTGCGTGCGCTTTACGCCCAGTAATTCCGATTAACGCTTGCACCCTCCGTATTACCGCGGCTGCTGGCACGGAGTTAGCCGGTGCTTCTTCTGCGGGTAACGTCAATCGACNNGGTTATTAACCNCATCGCCTTCCTCCCCGCTGAAAGTACTTTACAACCCGAAGGCCTTCTTCATACACGCGGCATGGCTGCATCAGGCTTGCGCCCATTGTGCAATATTCCCCACT…	#N/A	#N/A	#N/A	#N/A	#N/A	#N/A
462	2	3	0	Serratia plymuthica strain C-1 chromosome, complete genome	GAAGGCCTTCGGGTTGTAAAGCACTTTCAGCGGGGAGGAAGGCGATAAGGTTAATAACCTTGTNGATTGACGTTACCCGCAGAAGAAGCACCGGCTAACTCCGTGCCAGCAGCCGCGGTAATACGGAGGGTGCGAGCGTTAATCGGAATTACTGGGCGTAAAGCGTACGCAGGCGGTCTGTTAAGTCAGATGTGAAATCCCCGGGCTTAACCCGGGAACTGCATTTGAAACTGGCAGGCTAGAGTCTCGTAGAGGGGGGTAGAATTCCAGGTGTAGCGGTGAAATGCGTAGAGATCTGGAGGAATACCGGTGGCGAAGGCGGCCCCCTGGACGAAGACTGACGCTCAGGTACGAAAGCGTGGGGAGCAAACAGGATTAGATA	GTCTTCGTCCAGGGGGCCGCCTTCGCCACCGGTATTCCTCCAGATCTCTACGCATTTCACCGCTACACCTGGAATTCTACCCCCCTCTACGAGACTCTAGCCTGCCAGTTTCAAATGCAGTTCCCGGGTTAAGCCCGGGGATTTCACATCTGACTTAACAGACCGCCTGCGTACGCTTTACGCCCAGTAATTCCGATTAACGCTCGCACCCTCCGTATTACCGCGGCTGCTGGCACGGAGTTAGCCGGTGCTTCTTCTGCGGGTAACGTCAATCRACAAGGTTATTAACCTTATCGCCTTCCTCCCCGCTGAAAGTGCTTTACAACCCGAAGGCCTTCTTCACACACGCGGCATGGCTGCATCAGGCTTGCGCCCATTGTGCAATATTCCCCACTGCTA	CGGGTGGATTGCACGGCGTGGGTATCTCCGTCGTCAACGCCCTGTCGGAAAAGCTGGAACTGGTGGTGCGGCGCGAAGGCCGCGTCCATGAGCAGACCTACCTGGGCGGGATTCCGCAGGCGCCGCTGGCGGTGGTCGGTGAAACCGACCAGACCGGCACCACCATCCGCTTCTGGCCGAGCTTCGCCACCTTTACCAATAACGTAGAATTTCAATATGAAATCCTGGCCAAGCGCCTGCGCGAACTGTCCTTCCTGAATTCCGGCGTGTCCATCCGCCTGAAGGACAAGCGTAACGATAAAGAAGATCACTTCCACTACCAGGGCGGCATCAAGGCGTTTGTGGAATACCTGAGCAAGAATAAAAACCCGATCCATCCCACCGTGTTTTATTTCTCCA…	NNGATAGCGCAGTTTATCGGGATTATATTCATCCCGGCCGATGCCGCAGCCCAGCGCGGTTATCAGCGTGGCCACCTCCTGGGAGGAGAGCATCTTGTCGAAGCGCGCTTTCTCGACGTTGAGGATCTTGCCCTTCAGCGGCAAAATCGCCKGGTTTTTACGGTTACGGCCCTGCTTGGCGGATCCGCCGGCCGAGTCCCCTTCCACCAGGTACAGTTCTGATAAGGCCGGATCGCGTTCCTGGCAATCCGCCAGCTTGCCCGGCAGGCCCGCCAGGTCCAGCGCGCCTTTGCGGCGGGTCATTTCACGCGCTTTGCGGGCCGCTTCACGGGCGCGCGCGGCGTCRATGATCTTGCCCACTACGATTTTGGCGTCGGTGGGGTTTTCCAGCAAATAGGC…	#N/A	#N/A	#N/A	#N/A
463	2	3	0	Metschnikowia pulcherrima isolate 8 18S ribosomal RNA gene, partial sequence; internal transcribed spacer 1 and 5.8S ribosomal RNA gene, complete sequence; and internal transcribed spacer 2, partial sequence	#N/A	#N/A	#N/A	#N/A	#N/A	#N/A	GGCTGGGGCTAAAACTTATTCTAGCGCCGTTGATATTAGGCCGAAGCAGGACCAAACCGGAGGTTTGAGAGTAAATATCGCTCACCCACGCATGCCCTGGGGAATACCCCGGGGCGCAATGTGCGTTCAAAGATTCAATGATTCACGTCTGCAAGTCATATTACGTATCGCAATTCGCTGCGTTCTTCATCGATGCGAGAACCAAGAGATCCGTTGTTGAAAGTTTTTTNAANGANTNNTTGACGGTTAANATTTANAGTTTGTGCCTAAAAGGGTGTAANAANATTTTTAATGATCCTTCCGCAGGTTCACCTACGGAAACCTTGTTACNA	#N/A
464	0	0	0	Serratia fonticola strain M472 16S ribosomal RNA gene, partial sequence	#N/A	GAGCGTCAGTCTTTGTCCAGGGGGCCGCCTTCGCCACCGGTATTCCTCCAGATCTCTACGCATTTCACCGCTACACCTGGAATTCTACCCCCCTCTACAAGACTCTAGCTTGCCAGTTTCAAATGCAGTTCCCAAGTTAAGCTCGGGGATTTCACATCTGACTTAACAAACCGCCTGCGTGCGCTTTACGCCCAGTAATTCCGATTAACGCTTGCACCCTCCGTATTACCGCGGCTGCTGGCACGGAGTTAGCCGGTGCTTCTTCTGCGAGTAACGTCAATGAACRGTGCTATTAACACYGAACCCTTCCTCCTCGCTGAAAGTGCTTTACAACCCGAAGGCCTTCTTCACACACGCGGCATGGCTGCATCAGGCTTGCGCCCATTGTGCAATATTCCC…	#N/A	#N/A	#N/A	#N/A	#N/A	#N/A
465	2	1	0	Pseudomonas graminis strain PgKB30 chromosome, complete genome	#N/A	CNTTCGCCACTGGTGTTCCTNCCTATATCTACGCATTTCACCGCTACACMNGAAATTCCACCMCCCTCTNCCNTACTCTAGCTTGCCAGTTTNGNATGCAGTTCCCAGGTTGAGCCCGGGGATTTCACATNCNACTTAACAAACCRCCTNCGCGCGCTTTACGCCCAGTAATTCCGATTAACGCTTGCACCCTCYGTATTACCGCGGCTGCTGGCACNGAGTTAGCCGGTGCTTATTCTGNCGGTAACGTCAAAANANCAAGGTATTNNCTTACNGCCCTTCCTCCCNACTNAAAGTGCTTTACAANCCGAAGACCTTCTTCACACACGCGGCATGGCTGGATCAGGCTTNCGCCCATTGTNCAATATTCCCCACTGCTGCNCCCCGTAGGA	#N/A	#N/A	#N/A	#N/A	#N/A	#N/A
466	2	0	0	Pseudomonas graminis strain PgKB30 chromosome, complete genome	#N/A	GTGGTCGCCTTCGCCACTGGTGTTCCTTCCTATATCTACGCATTTCACCGCTACACAGGAAATTCCACCACCCTCTGCCCTACTCTAGCTTGCCAGTTTTGGATGCANTTCCCAGGTTGAGCCCGGGGATTTCACATTCAACTTAACAAACCACCTACGCNCGCTTTACNCCCANTAATTCCGATTAACGCTTGCNCCCTCTGTATTACCGCGGCTGCTGGCACANAGTTAGCCGGNGCTTATTCTGTCGGTAACGTCAAAACAGCAAGGTATTCGCTTACTGCCCTTCCTCCCAACTTAAAGTGCTTTACAATCCGAANACCTTCTTCACACACGCGGCATGGCTGGATCAGGCTTTCNCCCATTGTCCAATATTCCCCACTGCTGCCCCCCGTAG	#N/A	#N/A	#N/A	#N/A	#N/A	#N/A
467	2	2	0	0	#N/A	#N/A	#N/A	#N/A	#N/A	#N/A	#N/A	#N/A
468	0	0	0	0	#N/A	#N/A	#N/A	#N/A	#N/A	#N/A	#N/A	#N/A
469	0	0	0	Pantoea agglomerans strain KM1 16S ribosomal RNA gene, partial sequence	#N/A	CGTCAGTCTTTGTCCAGGGGGCCGCCTTCGCCACCGGTATTCCTCCAGATCTCTACGCATTTCACCGCTACACCTGGAATTCTACCCCCCTCTACAAGACTCAAGCCTGCCAGTTTCAAATGCAGTTCCCAGGTTAAGCCCGGGGATTTCACATCTGACTTAACAGACCGCCTGCGTGCGCTTTACGCCCAGTAATTCCGATTAACGCTTGCACCCTCCGTATTACCGCGGCTGCTGGCACGGAGTTAGCCGGTGCTTCTTCTGCGGGTAACGTCAATCGACNNGGTTATTAACCNCATCGCCTTCCTCCCCGCTGAAAGTACTTTACAACCCGAAGGCCTTCTTCATACACGCGGCATGGCTGCATCAGGCTTGCGCCCATTGTGCAATATTCCCCAC…	#N/A	#N/A	#N/A	#N/A	#N/A	#N/A
470	2	0	0	0	#N/A	#N/A	#N/A	#N/A	#N/A	#N/A	#N/A	#N/A
471	2	0	0	0	#N/A	#N/A	#N/A	#N/A	#N/A	#N/A	#N/A	#N/A
472	0	0	0	0	#N/A	#N/A	#N/A	#N/A	#N/A	#N/A	#N/A	#N/A
473	0	0	0	Pseudomonas sp. strain 2180 16S ribosomal RNA gene, partial sequence	#N/A	GTGTCAGTATGAGCCCAGGTGGTCGCCTTCGCCACTGGTGTTCCTTCCTATATCTACGCATTTCACCGCTACACAGGAAATTCCACCACCCTCTGCCCTACTCTAGCTTGCCAGTTTTGGATGCAGTTCCCAGGTTGAGCCCGGGGATTTCACATTCAACTTAACAAACCACCTACGCGCGCTTTACGCCCAGTAATTCCGATTAACGCTTGCACCCTCTGTATTACCGCGGCTGCTGGCACAGAGTTAGCCGGTGCTTATTCTGTCGGTAACGTCAAAACAGCAAGGTATTCGCTTACTGCCCTTCCTCCCAACTTAAAGTGCTTTACAATCCGAAGACCTTCTTCACACACGCGGCATGGCTGGATCAGGCTTTCGCCCATTGTCCAATATTCCCCA…	#N/A	#N/A	#N/A	#N/A	#N/A	#N/A
474	0	0	0	0	#N/A	#N/A	#N/A	#N/A	#N/A	#N/A	#N/A	#N/A
475	2	1	0	0	#N/A	#N/A	#N/A	#N/A	#N/A	#N/A	#N/A	#N/A
476	2	2	0	0	#N/A	#N/A	#N/A	#N/A	#N/A	#N/A	#N/A	#N/A
477	0	0	0	0	#N/A	#N/A	#N/A	#N/A	#N/A	#N/A	#N/A	#N/A
478	0	0	0	Priestia megaterium strain NASRJ6 16S ribosomal RNA gene, partial sequence	#N/A	GCGTCAGTTACAGACCAAAAAGCCGCCTTCGCCACTGGTGTTCCTCCACATCTCTACGCATTTCACCGCTACACGTGGAATTCCGCTTTTCTCTTCTGCACTCAAGTTCCCCAGTTTCCAATGACCCTCCACGGTTGAGCCGTGGGCTTTCACATCAGACTTAAGAAACCGCCTGCGCGCGCTTTACGCCCAATAATTCCGGATAACGCTTGCCACCTACGTATTACCGCGGCTGCTGGCACGTAGTTAGCCGTGGCTTTCTGGTTAGGTACCGTCAAGGTACNAGCAGTTACTCTYGTACTTGTTCTTCCCTAACAACAGAGTTTTACGACCCGAAAGCCTTCATCACTCACGCGGCGTTGCTCCGTCAGACTTTCGTCCATTGCGGAAGATTCCCTA…	#N/A	#N/A	#N/A	#N/A	#N/A	#N/A
479	0	0	0	0	#N/A	#N/A	#N/A	#N/A	#N/A	#N/A	#N/A	#N/A
480	1	0	0	0	#N/A	#N/A	#N/A	#N/A	#N/A	#N/A	#N/A	#N/A
481	1	0	0	0	#N/A	#N/A	#N/A	#N/A	#N/A	#N/A	#N/A	#N/A
482	3	1	0	Metschnikowia sp. (in: Fungi) strain EB2016-107 small subunit ribosomal RNA gene, partial sequence; internal transcribed spacer 1, 5.8S ribosomal RNA gene, and internal transcribed spacer 2, complete sequence; and large subunit ribosomal RNA gene, partial sequence	#N/A	#N/A	#N/A	#N/A	#N/A	#N/A	AGNTGGGGCTAAAACTTATTCTAGCGCCGTTGATATTAGGCCGAAGCAGGACCAAACCGGAGGTTTGAGAGTAAATATCGCTCACCCACGCATGCCCTGGGGAATACCCCGGGGCGCAATGTGCGTTCAAAGATTCAATGATTCACGTCTGCAAGTCATATTACGTATCGCAATTCGCTGCGTTCTTCATCGATGCGAGAACCAAGAGATCCGTTGTTGAAAGTTTTTTAATTGNGTTNTTGA	#N/A
483	3	1	0	Metschnikowia pulcherrima culture CBS:2244 small subunit ribosomal RNA gene, partial sequence; internal transcribed spacer 1 and 5.8S ribosomal RNA gene, complete sequence; and internal transcribed spacer 2, partial sequence	#N/A	#N/A	#N/A	#N/A	#N/A	#N/A	GGATGGGGCTAAAACTTATTCTAGCGCCGTTGATATTAGGCCGAAGCAGGACCAAACCAGAGGTTTGAGAGTAAATATCGCTCACCCACGCATGCCCTGGGGAATACCCCGGGGCGCAATGTGCGTTCAAAGATTCAATGATTCACGTCTGCAAGTCATATTACGTATCGCAATTCGCTGCGTTCTTCATCGATGCGAGAACCAAGAGATCCGTTGTTGAAAGTTTTTTTAATAAA	#N/A
484	0	0	0	0	#N/A	#N/A	#N/A	#N/A	#N/A	#N/A	#N/A	#N/A
485	0	0	0	0	#N/A	#N/A	#N/A	#N/A	#N/A	#N/A	#N/A	#N/A
486	0	0	0	0	#N/A	#N/A	#N/A	#N/A	#N/A	#N/A	#N/A	#N/A
487	0	0	0	0	#N/A	#N/A	#N/A	#N/A	#N/A	#N/A	#N/A	#N/A
488	0	0	0	0	#N/A	#N/A	#N/A	#N/A	#N/A	#N/A	#N/A	#N/A
489	0	0	0	0	#N/A	#N/A	#N/A	#N/A	#N/A	#N/A	#N/A	#N/A
490	0	0	0	0	#N/A	#N/A	#N/A	#N/A	#N/A	#N/A	#N/A	#N/A
491	0	0	0	0	#N/A	#N/A	#N/A	#N/A	#N/A	#N/A	#N/A	#N/A
492	0	0	0	0	#N/A	#N/A	#N/A	#N/A	#N/A	#N/A	#N/A	#N/A
493	0	0	0	0	#N/A	#N/A	#N/A	#N/A	#N/A	#N/A	#N/A	#N/A
494	0	0	0	0	#N/A	#N/A	#N/A	#N/A	#N/A	#N/A	#N/A	#N/A
495	0	0	0	0	#N/A	#N/A	#N/A	#N/A	#N/A	#N/A	#N/A	#N/A
496	0	0	0	0	#N/A	#N/A	#N/A	#N/A	#N/A	#N/A	#N/A	#N/A
497	0	0	0	0	#N/A	#N/A	#N/A	#N/A	#N/A	#N/A	#N/A	#N/A
498	1	0	0	0	#N/A	#N/A	#N/A	#N/A	#N/A	#N/A	#N/A	#N/A
499	0	0	0	0	#N/A	#N/A	#N/A	#N/A	#N/A	#N/A	#N/A	#N/A
500	0	0	0	0	#N/A	#N/A	#N/A	#N/A	#N/A	#N/A	#N/A	#N/A
501	0	0	0	0	#N/A	#N/A	#N/A	#N/A	#N/A	#N/A	#N/A	#N/A
502	0	0	0	0	#N/A	#N/A	#N/A	#N/A	#N/A	#N/A	#N/A	#N/A
503	0	0	0	0	#N/A	#N/A	#N/A	#N/A	#N/A	#N/A	#N/A	#N/A
504	1	0	0	0	#N/A	#N/A	#N/A	#N/A	#N/A	#N/A	#N/A	#N/A
505	0	0	0	0	#N/A	#N/A	#N/A	#N/A	#N/A	#N/A	#N/A	#N/A
506	0	0	0	0	#N/A	#N/A	#N/A	#N/A	#N/A	#N/A	#N/A	#N/A
507	0	0	0	0	#N/A	#N/A	#N/A	#N/A	#N/A	#N/A	#N/A	#N/A
508	0	0	0	0	#N/A	#N/A	#N/A	#N/A	#N/A	#N/A	#N/A	#N/A
509	0	0	0	0	#N/A	#N/A	#N/A	#N/A	#N/A	#N/A	#N/A	#N/A
510	0	0	0	0	#N/A	#N/A	#N/A	#N/A	#N/A	#N/A	#N/A	#N/A
511	0	0	0	0	#N/A	#N/A	#N/A	#N/A	#N/A	#N/A	#N/A	#N/A
512	0	0	0	0	#N/A	#N/A	#N/A	#N/A	#N/A	#N/A	#N/A	#N/A
513	0	0	0	0	#N/A	#N/A	#N/A	#N/A	#N/A	#N/A	#N/A	#N/A
514	0	0	0	0	#N/A	#N/A	#N/A	#N/A	#N/A	#N/A	#N/A	#N/A
515	0	0	0	0	#N/A	#N/A	#N/A	#N/A	#N/A	#N/A	#N/A	#N/A
516	0	0	0	0	#N/A	#N/A	#N/A	#N/A	#N/A	#N/A	#N/A	#N/A
517	0	0	0	0	#N/A	#N/A	#N/A	#N/A	#N/A	#N/A	#N/A	#N/A
518	2	0	0	0	#N/A	#N/A	#N/A	#N/A	#N/A	#N/A	#N/A	#N/A
519	0	0	0	0	#N/A	#N/A	#N/A	#N/A	#N/A	#N/A	#N/A	#N/A
520	0	0	0	0	#N/A	#N/A	#N/A	#N/A	#N/A	#N/A	#N/A	#N/A
521	0	0	0	0	#N/A	#N/A	#N/A	#N/A	#N/A	#N/A	#N/A	#N/A
522	0	0	0	0	#N/A	#N/A	#N/A	#N/A	#N/A	#N/A	#N/A	#N/A
523	2	0	0	0	#N/A	#N/A	#N/A	#N/A	#N/A	#N/A	#N/A	#N/A
524	1	0	0	0	#N/A	#N/A	#N/A	#N/A	#N/A	#N/A	#N/A	#N/A
525	0	0	0	0	#N/A	#N/A	#N/A	#N/A	#N/A	#N/A	#N/A	#N/A
526	0	0	0	0	#N/A	#N/A	#N/A	#N/A	#N/A	#N/A	#N/A	#N/A
527	0	0	0	0	#N/A	#N/A	#N/A	#N/A	#N/A	#N/A	#N/A	#N/A
528	0	1	0	0	#N/A	#N/A	#N/A	#N/A	#N/A	#N/A	#N/A	#N/A
529	0	1	0	0	#N/A	#N/A	#N/A	#N/A	#N/A	#N/A	#N/A	#N/A
530	0	1	0	0	#N/A	#N/A	#N/A	#N/A	#N/A	#N/A	#N/A	#N/A
531	0	0	0	0	#N/A	#N/A	#N/A	#N/A	#N/A	#N/A	#N/A	#N/A
532	2	0	0	0	#N/A	#N/A	#N/A	#N/A	#N/A	#N/A	#N/A	#N/A
533	2	1	0	0	#N/A	#N/A	#N/A	#N/A	#N/A	#N/A	#N/A	#N/A
534	0	0	0	0	#N/A	#N/A	#N/A	#N/A	#N/A	#N/A	#N/A	#N/A
535	1	2	0	0	#N/A	#N/A	#N/A	#N/A	#N/A	#N/A	#N/A	#N/A
536	1	0	0	0	#N/A	#N/A	#N/A	#N/A	#N/A	#N/A	#N/A	#N/A
537	2	0	0	0	#N/A	#N/A	#N/A	#N/A	#N/A	#N/A	#N/A	#N/A
538	2	1	0	0	#N/A	#N/A	#N/A	#N/A	#N/A	#N/A	#N/A	#N/A
539	1	0	0	0	#N/A	#N/A	#N/A	#N/A	#N/A	#N/A	#N/A	#N/A
